# Supplementary material
Source: publisher figshare collection journal article supplement (https://acs.figshare.com/ndownloader/files/5836440)

## SUPPORTING INFORMATION

### Synthesis of Annulated $\gamma$ -Carbolines by Palladium-Catalyzed Intramolecular Iminoannulation

Haiming Zhang and Richard C. Larock\*

*Department of Chemistry, Iowa State University, Ames, IA 50011*

*larock@iastate.edu*

**General.**  $^1\text{H}$  and  $^{13}\text{C}$  NMR spectra were recorded at 300 and 75.5 MHz or 400 and 100 MHz respectively. Thin-layer chromatography was performed using commercially prepared 60-mesh silica gel plates (Whatman K6F), and visualization was effected with short wavelength UV light (254 nm) and basic  $\text{KMnO}_4$  solution [3 g of  $\text{KMnO}_4$  + 20 g of  $\text{K}_2\text{CO}_3$  + 5 mL of  $\text{NaOH}$  (5 %) + 300 mL of  $\text{H}_2\text{O}$ ]. All melting points are uncorrected. High-resolution mass spectra were recorded on a Kratos MS50TC double focusing magnetic sector mass spectrometer using EI at 70 eV. All reagents were used directly as obtained commercially unless otherwise noted. 2-Bromo-1*H*-indole-3-carboxaldehyde,<sup>1</sup> 1-bromoundec-4-yne,<sup>2</sup> 6-phenylhex-5-yn-1-ol,<sup>3</sup> 2-(phenylethynyl)benzyl alcohol,<sup>4</sup> and 1-(hydroxymethyl)-2-(trifluoromethanesulfonyloxy)cyclopentene<sup>5</sup> were prepared according to literature procedures. The following starting materials were prepared as described.

**5-Chloro-1-phenylpent-1-yne.** This compound was prepared by a procedure used to synthesize 6-phenylhex-5-yn-1-ol,<sup>3</sup> but using iodobenzene and 5-chloropent-1-yne. The product was purified using 50:1 hexanes/EtOAc to afford 87% of the indicated compound as a colorless oil whose spectral properties are consistent with those in the literature.<sup>6</sup>

**6-Chloro-1-(4-methoxyphenyl)hex-2-yn-1-ol.** To 5-chloropent-1-yne (0.513 g, 5.0 mmol) in dry THF (10 mL) was added *n*-BuLi (5.5 mmol, 2.5 M in hexanes) dropwise at -78 °C. The mixture was stirred for 30 min and a solution

of 4-methoxybenzaldehyde (0.885g, 6.5 mmol) in THF (10 mL) was added slowly. The resulting mixture was stirred at -78 °C for another 30 min and at room temperature for 2 h. The reaction was quenched with satd aq NH<sub>4</sub>Cl and extracted with ether (3 x 20 mL). The combined organic layers were dried (Na<sub>2</sub>SO<sub>4</sub>) and the solvent was evaporated. The residue was purified using 2:1 hexanes/EtOAc to afford 1.08 g (91%) of the indicated compound as a pale yellow oil: <sup>1</sup>H NMR (CDCl<sub>3</sub>) δ 1.97 (quintet, *J* = 6.9 Hz, 2H), 2.45 (dt, *J* = 2.1, 6.9 Hz, 2H), 3.63 (t, *J* = 6.9 Hz, 2H), 3.79 (s, 3H), 5.37 (dd, *J* = 3.9, 1.8 Hz, 1H), 6.88 (dd, *J* = 6.9, 1.8 Hz, 2H), 7.42 (dd, *J* = 6.9, 1.8 Hz, 2H); <sup>13</sup>C NMR (CDCl<sub>3</sub>) δ 16.5, 31.5, 43.9, 55.5, 64.5, 81.6, 85.3, 114.1, 128.2, 133.7, 159.8.

**Ethyl 3-(5-chloropent-1-ynyl)benzoate.** This compound was prepared by a procedure used to synthesize 6-phenylhex-5-yn-1-ol,<sup>3</sup> but using ethyl 3-iodobenzoate and 5-chloropent-1-yne. The product was purified using 10:1 hexanes/EtOAc to afford 99% of the indicated compound as a yellow oil: <sup>1</sup>H NMR (CDCl<sub>3</sub>) δ 1.39 (t, *J* = 7.2 Hz, 3H), 2.06 (quintet, *J* = 6.8 Hz, 2H), 2.62 (t, *J* = 6.8 Hz, 2H), 3.72 (t, *J* = 6.8 Hz, 2H), 4.37 (q, *J* = 7.2 Hz, 2H), 7.36 (t, *J* = 7.6 Hz, 1H), 7.56 (d, *J* = 7.6 Hz, 1H), 7.95 (d, *J* = 7.6 Hz, 1H), 8.07 (s, 1H); <sup>13</sup>C NMR (CDCl<sub>3</sub>) δ 14.4, 16.9, 31.4, 43.7, 61.2, 80.7, 89.2, 124.0, 128.4, 128.8, 130.7, 132.7, 135.7, 166.0.

**5-(5-Chloropent-1-ynyl)pyrimidine.** This compound was prepared by a procedure used to synthesize 6-phenylhex-5-yn-1-ol,<sup>3</sup> but using 5-bromopyrimidine and 5-chloropent-1-yne. The product was purified using 2:1 hexanes/EtOAc to afford a 93% yield of the indicated compound as a yellow oil: <sup>1</sup>H NMR (CDCl<sub>3</sub>) δ 2.09 (quintet, *J* = 6.9 Hz, 2H), 2.68 (t, *J* = 6.9 Hz, 2H), 3.71 (t, *J* = 6.9 Hz, 2H), 8.73 (s, 2H), 9.11 (s, 1H); <sup>13</sup>C NMR (CDCl<sub>3</sub>) δ 17.0, 31.0, 43.5, 74.9, 95.9, 120.1, 156.5, 158.8.

**1-(Hydroxymethyl)-2-(phenylethynyl)cyclopentene.** This compound was prepared by a procedure used to synthesize 6-phenylhex-5-yn-1-ol,<sup>3</sup> but using 1-(hydroxymethyl)-2-(trifluoromethanesulfonyloxy)cyclopentene<sup>5</sup> and phenylacetylene. The product was purified using 2:1 hexanes/EtOAc to afford a

95% yield of the indicated compound as a yellow oil:  $^1\text{H}$  NMR ( $\text{CDCl}_3$ )  $\delta$  1.94 (quintet,  $J$  = 5.7 Hz, 2H), 2.57 (m, 4H), 4.42 (s, 2H), 7.30 (m, 3H), 7.42 (m, 2H);  $^{13}\text{C}$  NMR ( $\text{CDCl}_3$ )  $\delta$  22.6, 34.0, 37.1, 60.9, 85.1, 94.5, 120.0, 123.4, 128.2, 128.4, 131.4, 150.0.

**1-(Bromomethyl)-2-(phenylethynyl)cyclopentene.** To a solution of 1-(hydroxymethyl)-2-(phenylethynyl)cyclopentene (1.0 mmol, 0.198 g) and  $\text{CBr}_4$  (1.3 mmol, 0.431 g) in  $\text{CH}_2\text{Cl}_2$  (5 mL) at 0 °C was added  $\text{PPh}_3$  (1.5 mmol, 0.393 g) portionwise. The mixture was stirred at room temperature for 2 h. The reaction mixture was flushed through a short silica gel column to remove the triphenylphosphine oxide. The solvent was evaporated and the residue was purified using 20:1 hexanes/EtOAc to afford 0.248 g (95%) of the indicated compound as a yellow oil:  $^1\text{H}$  NMR ( $\text{CDCl}_3$ )  $\delta$  1.97 (quintet,  $J$  = 7.6 Hz, 2H), 2.61 (t,  $J$  = 7.6 Hz, 4H), 4.29 (s, 2H), 7.31 (m, 3H), 7.46 (m, 2H);  $^{13}\text{C}$  NMR ( $\text{CDCl}_3$ )  $\delta$  22.3, 29.7, 34.3, 37.2, 84.6, 96.3, 123.2, 124.0, 128.4, 128.5, 131.6, 145.7.

**General Procedure for the Synthesis of *N*-Substituted 2-Bromo-1*H*-indole-3-carboxaldehydes.** Method A: 2-bromo-1*H*-indole-3-carboxaldehyde (0.5 mmol), the alkynyl halide (0.6 mmol), NaI (0.75 mmol) and  $\text{K}_2\text{CO}_3$  (0.75 mmol) were placed in a 4-dram vial and acetone (3 mL) was added. The vial was flushed with Ar and heated in an oil bath at 75 °C for 24 h. The mixture was cooled and diluted with ether (5 mL). The precipitate was removed by filtration and the solvent was evaporated. The residue was purified by chromatography on a silica gel column. Method B: to a mixture of 2-bromo-1*H*-indole-3-carboxaldehyde (0.5 mmol), the alkynyl alcohol (0.6 mmol), and  $\text{PPh}_3$  (0.75 mmol) in  $\text{CH}_2\text{Cl}_2$  (8 mL) was added diethyl azodicarboxylate (0.75 mmol) at 0 °C. The resulting mixture was flushed with Ar and stirred at room temperature for 24 h. The mixture was concentrated and the residue was purified by chromatography on a silica gel column.

***N*-Substituted 2-Bromo-1*H*-indole-3-carboxaldehydes Prepared**

**2-Bromo-1-(5-phenylpent-4-ynyl)-1H-indole-3-carboxaldehyde (3a).**

This compound was prepared using 5-chloro-1-phenylpent-1-yne according to method A. The product was purified using 5:1 hexanes/EtOAc to afford 166 mg (91%) of the indicated compound as a yellow solid: mp 74-76 °C; <sup>1</sup>H NMR (CDCl<sub>3</sub>) δ 2.13 (quintet, *J* = 7.2 Hz, 2H), 2.52 (t, *J* = 7.2 Hz, 2H), 4.46 (t, *J* = 7.2 Hz, 2H), 7.25-7.38 (m, 5H), 7.38-7.50 (m, 3H), 8.32 (m, 1H), 10.03 (s, 1H); <sup>13</sup>C NMR (CDCl<sub>3</sub>) δ 17.0, 28.5, 44.3, 82.2, 88.0, 109.9, 115.5, 121.3, 123.3, 123.4, 124.2, 125.4, 125.7, 128.1, 128.4, 131.6, 136.9, 185.5; IR (neat, cm<sup>-1</sup>) 3055, 2947, 2806, 2228, 1653; HRMS calcd for C<sub>20</sub>H<sub>16</sub>BrNO: 365.0415. Found: 365.0420.

**2-Bromo-1-(undec-4-ynyl)-1H-indole-3-carboxaldehyde (3b).**

This compound was prepared using 1-bromoundec-4-yne according to method A. The product was purified using 3:1 hexanes/EtOAc to afford 172 mg (92%) of the indicated compound as a yellow oil: <sup>1</sup>H NMR (CDCl<sub>3</sub>) δ 0.90 (t, *J* = 7.2 Hz, 3H), 1.25-1.35 (m, 4H), 1.35-1.45 (m, 2H), 1.51 (quintet, *J* = 7.2 Hz, 2H), 1.99 (quintet, *J* = 7.2 Hz, 2H), 2.19 (m, 2H), 2.27 (m, 2H), 4.38 (2H, *J* = 7.2 Hz, 2H), 7.30 (m, 2H), 7.44 (m, 1H), 8.31 (m, 1H), 10.03 (s, 1H); <sup>13</sup>C NMR (CDCl<sub>3</sub>) δ 14.1, 16.4, 18.8, 22.7, 28.7, 28.8, 29.1, 31.5, 44.4, 78.1, 82.2, 109.9, 115.4, 121.3, 123.4, 124.1, 125.4, 125.7, 136.9, 185.4; IR (neat, cm<sup>-1</sup>) 3060, 2960, 2855, 1660; HRMS calcd for C<sub>20</sub>H<sub>24</sub>BrNO: 373.1041. Found: 373.1046.

**2-Bromo-1-[6-hydroxy-6-(4-methoxyphenyl)hex-4-ynyl]-1H-indole-3-carboxaldehyde (3c).** This compound was prepared using 6-chloro-1-(4-methoxyphenyl)hex-2-yn-1-ol according to method A. The product was purified using 4:5 hexanes/EtOAc to afford 180 mg (85%) of the indicated compound as a thick yellow oil: <sup>1</sup>H NMR (CDCl<sub>3</sub>) δ 2.04 (m, 2H), 2.36 (m, 2H), 2.51 (s, 1H), 3.80 (s, 3H), 4.34 (t, *J* = 7.2 Hz, 2H), 5.43 (s, 1H), 6.91 (d, *J* = 8.4 Hz, 2H), 7.20-7.33 (m, 3H), 7.47 (d, *J* = 8.4 Hz, 2H), 8.28 (dd, *J* = 7.6, 1.6 Hz, 1H), 9.96 (s, 1H); <sup>13</sup>C NMR (CDCl<sub>3</sub>) δ 16.4, 28.2, 44.3, 55.4, 64.4, 82.2, 84.9, 109.9, 114.1, 115.4, 121.2, 123.4, 124.2, 125.3, 125.7, 128.0, 133.5, 136.8, 159.7, 185.5; IR (neat,

cm<sup>-1</sup>) 3386, 2953, 1655; HRMS calcd for C<sub>22</sub>H<sub>20</sub>BrNO<sub>3</sub>: 425.0627. Found: 425.0633.

**Ethyl 3-[5-(2-bromo-3-formyl-1H-indol-1-yl)pent-1-ynyl]benzoate (3d).**

This compound was prepared using ethyl 3-(5-chloropent-1-ynyl)benzoate according to method A. The product was purified using 2:1 hexanes/EtOAc to afford 205 mg (94%) of the indicated compound as a yellow oil: <sup>1</sup>H NMR (CDCl<sub>3</sub>) δ 1.38 (t, *J* = 7.2 Hz, 3H), 2.13 (quintet, *J* = 7.2 Hz, 2H), 2.51 (t, *J* = 7.2 Hz, 2H), 4.37 (q, *J* = 7.2 Hz, 2H), 4.45 (t, *J* = 7.2 Hz, 2H), 7.25-7.33 (m, 2H), 7.37 (t, *J* = 8.0 Hz, 1H), 7.44 (d, *J* = 7.2 Hz, 1H), 7.55 (d, *J* = 8.0 Hz, 1H), 7.96 (d, *J* = 8.0 Hz, 1H), 8.08 (s, 1H), 8.30 (d, *J* = 8.0 Hz, 1H), 10.01 (s, 1H); <sup>13</sup>C NMR (CDCl<sub>3</sub>) δ 14.4, 17.0, 28.4, 44.3, 61.3, 81.3, 89.0, 109.8, 115.5, 121.4, 123.4, 123.7, 124.2, 125.4, 125.6, 128.5, 129.1, 130.8, 132.7, 135.6, 166.0, 185.4; IR (neat, cm<sup>-1</sup>) 2979, 2232, 1717, 1658; HRMS calcd for C<sub>23</sub>H<sub>20</sub>BrNO<sub>3</sub>: 437.0627. Found: 437.0633.

**2-Bromo-1-[5-(pyrimidin-5-yl)pent-4-ynyl]-1H-indole-3-carboxaldehyde (3e).** This compound was prepared using 5-(5-chloropent-1-ynyl)pyrimidine according to method A. The product was purified using 1:3 hexanes/EtOAc to afford 152 mg (83%) of the indicated compound as a pale yellow solid: mp 116-118 °C; <sup>1</sup>H NMR (CDCl<sub>3</sub>) δ 2.19 (quintet, *J* = 7.2 Hz, 2H), 2.58 (t, *J* = 7.2 Hz, 2H), 4.45 (t, *J* = 7.2 Hz, 2H), 7.28-7.35 (m, 2H), 7.40 (m, 1H), 8.31 (m, 1H), 8.70 (s, 2H), 9.12 (s, 1H), 10.02 (s, 1H); <sup>13</sup>C NMR (CDCl<sub>3</sub>) δ 17.1, 28.0, 44.2, 75.3, 95.6, 109.7, 115.6, 119.9, 121.4, 123.5, 124.3, 125.4, 125.5, 136.8, 156.7, 158.8, 185.4; IR (neat, cm<sup>-1</sup>) 3036, 2950, 2807, 2231, 1657; HRMS calcd for C<sub>18</sub>H<sub>14</sub>BrN<sub>3</sub>O: 367.0320. Found: 367.0326.

**2-Bromo-1-(6-phenylhex-5-ynyl)-1H-indole-3-carboxaldehyde (3f).**

This compound was prepared using 6-phenylhex-5-yn-1-ol according to method B. The product was purified using 4:1 hexanes/EtOAc to afford 170 mg (89%) of the indicated compound as a yellow oil: <sup>1</sup>H NMR (CDCl<sub>3</sub>) δ 1.70 (quintet, *J* = 7.6 Hz, 2H), 2.05 (quintet, *J* = 7.6 Hz, 2H), 2.49 (t, *J* = 7.6 Hz, 2H), 4.33 (t, *J* = 7.6 Hz, 2H), 7.25-7.31 (m, 5H), 7.31-7.40 (m, 3H), 8.32 (m, 1H), 10.03 (s, 1H); <sup>13</sup>C

NMR (CDCl<sub>3</sub>)  $\delta$  19.1, 25.7, 28.5, 45.0, 81.7, 88.8, 109.9, 115.3, 121.3, 123.4, 123.6, 124.1, 125.5, 125.7, 127.9, 128.3, 131.6, 136.8, 185.5; IR (neat, cm<sup>-1</sup>) 3055, 2942, 2805, 2232, 1653; HRMS calcd for C<sub>21</sub>H<sub>18</sub>BrNO: 379.0572. Found: 379.0578.

**2-Bromo-1-(dec-3-ynyl)-1H-indole-3-carboxaldehyde (3g).** This compound was prepared using 3-decyn-1-ol according to method B. The product was purified using 6:1 hexanes/EtOAc to afford 180 mg (99%) of the indicated compound as a yellow oil which crystallizes upon standing at 0 °C: mp 52-54 °C; <sup>1</sup>H NMR (CDCl<sub>3</sub>)  $\delta$  0.88 (t,  $J$  = 7.2 Hz, 3H), 1.18-1.31 (m, 6H), 1.38 (m, 2H), 2.06 (m, 2H), 2.68 (m, 2H), 4.40 (t,  $J$  = 7.2 Hz, 2H), 7.26-7.32 (m, 2H), 7.40 (m, 1H), 8.31 (m, 1H), 10.04 (s, 1H); <sup>13</sup>C NMR (CDCl<sub>3</sub>)  $\delta$  14.1, 18.7, 19.9, 22.6, 28.6, 31.4, 44.5, 74.9, 83.9, 110.0, 115.5, 121.3, 123.4, 124.1, 125.4, 125.6, 136.8, 185.5; IR (neat, cm<sup>-1</sup>) 3055, 2929, 2856, 1660; HRMS calcd for C<sub>19</sub>H<sub>22</sub>BrNO: 359.0890. Found: 359.0890.

**2-Bromo-1-[2-(phenylethynyl)benzyl]-1H-indole-3-carboxaldehyde (3h).** This compound was prepared using 2-(phenylethynyl)benzyl alcohol according to method B. The product was purified using 5:1 hexanes/EtOAc to afford 86 mg (42%) of the indicated compound as a yellow solid: mp 151-152 °C; <sup>1</sup>H NMR (CDCl<sub>3</sub>)  $\delta$  5.76 (s, 2H), 6.59 (d,  $J$  = 7.8 Hz, 1H), 7.18 (dt,  $J$  = 1.2, 7.5 Hz, 1H), 7.25-7.34 (m, 4H), 7.36-7.42 (m, 3H), 7.58-7.64 (m, 3H), 8.37 (dt,  $J$  = 7.2, 1.2 Hz), 10.10 (s, 1H); <sup>13</sup>C NMR (CDCl<sub>3</sub>)  $\delta$  47.5, 86.4, 96.0, 110.6, 116.0, 121.5, 121.6, 122.9, 123.8, 124.7, 125.6, 125.7, 126.5, 128.1, 128.8, 129.1, 129.3, 131.8, 132.7, 136.8, 137.4, 185.8; IR (neat, cm<sup>-1</sup>) 3058, 2808, 2249, 1659; HRMS calcd for C<sub>24</sub>H<sub>16</sub>BrNO: 413.0415. Found: 413.0423.

**2-Bromo-1-[[2-(phenylethynyl)cyclopent-1-en-1-yl]methyl]-1H-indole-3-carboxaldehyde (3i).** This compound was prepared using 1-(bromomethyl)-2-(phenylethynyl)cyclopentene according to method A. The product was purified using 5:1 hexanes/EtOAc to afford 110 mg (55%) of the indicated compound as a pale yellow solid: mp 162-163 °C; <sup>1</sup>H NMR (CDCl<sub>3</sub>)  $\delta$  1.86 (quintet,  $J$  = 7.2 Hz, 2H), 2.24 (t,  $J$  = 7.2 Hz, 2H), 2.63 (t,  $J$  = 7.2 Hz, 2H), 5.20 (s, 2H), 7.26-7.38 (m,

5H), 7.43-7.55 (m, 3H), 8.31 (m, 1H), 10.04 (s, 1H);  $^{13}\text{C}$  NMR ( $\text{CDCl}_3$ )  $\delta$  22.2, 33.8, 36.9, 45.0, 84.5, 96.1, 110.4, 115.5, 121.2, 123.0, 123.4, 123.5, 124.3, 125.4, 126.0, 128.5, 128.6, 131.5, 137.1, 143.4, 185.6; IR (neat,  $\text{cm}^{-1}$ ) 3055, 2955, 2252, 1658; HRMS calcd for  $\text{C}_{23}\text{H}_{18}\text{BrNO}$ : 403.0572. Found: 403.0577.

**General Procedure for the Synthesis of Annulated  $\gamma$ -Carbolines by Palladium-Catalyzed Intramolecular Iminoannulation.** The *N*-substituted 2-bromo-1*H*-indole-3-carboxaldehyde (0.25 mmol) was placed in a 2-dram vial and *tert*-butylamine (1 mL) was added. The vial was flushed with Ar and carefully sealed. The mixture was heated at 100 °C for 8 h and cooled, diluted with ether, dried over anhydrous  $\text{Na}_2\text{SO}_4$  and filtered. The solvent was evaporated and the residue was dissolved in DMF (5 mL) and transferred to a 4-dram vial containing  $\text{Pd}(\text{OAc})_2$  (5 mol %),  $\text{PPh}_3$  (10 mol %) and  $\text{Na}_2\text{CO}_3$  (0.25 mmol). The mixture was flushed with Ar and heated at 100 °C for the indicated time. The completion of the reaction was established by the observation of palladium black. The mixture (except entries 3 and 5 in Table 1, which produce reasonably water soluble products) was diluted with EtOAc (30 mL), washed with satd aq  $\text{NH}_4\text{Cl}$  ( $3 \times 10$  mL) and dried over anhydrous  $\text{Na}_2\text{SO}_4$ . The solvent was evaporated and the residue was purified by chromatography on a silica gel column. The solvent from the reaction mixtures of entries 3 and 5 was directly evaporated and the residue was purified by chromatography on a silica gel column.

### Annulated $\gamma$ -Carbolines Prepared

**3-Phenyl-5,6-dihydro-4*H*-indolo[3,2,1-*ij*]-1,6-naphthyridine (4a).** The mixture was chromatographed using 1:1 hexanes/EtOAc to afford 66 mg (93%) of the indicated compound as a white solid: mp 172-173 °C;  $^1\text{H}$  NMR ( $\text{CDCl}_3$ )  $\delta$  2.24 (quintet,  $J = 6.0$  Hz, 2H), 3.15 (t,  $J = 6.0$  Hz, 2H), 4.22 (t,  $J = 6.0$  Hz, 2H), 7.31 (dt,  $J = 0.9, 7.8$  Hz, 1H), 7.36-7.43 (m, 2H), 7.43-7.52 (m, 3H), 7.69-7.73 (m, 2H), 8.16 (d,  $J = 7.8$  Hz, 1H), 9.23 (s, 1H);  $^{13}\text{C}$  NMR ( $\text{CDCl}_3$ )  $\delta$  22.7, 23.9, 41.0, 108.9, 113.8, 116.9, 120.5, 121.5, 121.6, 126.5, 127.9, 128.4, 129.6, 140.3,

140.5, 140.7, 143.2, 150.8; IR (neat,  $\text{cm}^{-1}$ ) 3055, 2943; HRMS calcd for  $\text{C}_{20}\text{H}_{16}\text{N}_2$ : 284.1314. Found: 284.1317.

**3-Hexyl-5,6-dihydro-4H-indolo[3,2,1-*ij*]-1,6-naphthyridine (4b).** The mixture was chromatographed using 10:1  $\text{CHCl}_3/\text{MeOH}$  to afford 70 mg (95%) of the indicated compound as a white solid: mp 58-59  $^{\circ}\text{C}$ ;  $^1\text{H}$  NMR ( $\text{CDCl}_3$ )  $\delta$  0.88 (t,  $J$  = 6.9 Hz, 3H), 1.25-1.48 (m, 6H), 1.75 (m, 2H), 2.32 (quintet,  $J$  = 6.0 Hz, 2H), 2.89 (t,  $J$  = 7.8 Hz, 2H), 3.01 (t,  $J$  = 6.0 Hz, 2H), 4.15 (t,  $J$  = 6.0 Hz, 2H), 7.26 (dt,  $J$  = 1.2, 7.8 Hz, 1H), 7.36 (d,  $J$  = 8.1 Hz, 1H), 7.46 (dt,  $J$  = 1.2, 7.2 Hz, 1H), 8.09 (d,  $J$  = 7.8 Hz, 1H), 9.06 (s, 1H);  $^{13}\text{C}$  NMR ( $\text{CDCl}_3$ )  $\delta$  14.4, 21.8, 22.4, 22.9, 29.7, 30.2, 32.1, 34.8, 40.7, 108.8, 113.3, 116.3, 120.2, 121.3, 121.8, 126.1, 140.0, 140.4, 143.2, 153.5; IR (neat,  $\text{cm}^{-1}$ ) 3053, 2925, 2854; HRMS calcd for  $\text{C}_{20}\text{H}_{24}\text{N}_2$ : 292.1940. Found: 292.1945.

**5,6-Dihydro-4H-indolo[3,2,1-*ij*]-1,6-naphthyridin-3-yl(4-methoxyphenyl)methanol (4c).** The mixture was chromatographed using 10:1  $\text{CHCl}_3/\text{MeOH}$  to afford 82 mg (95%) of the indicated compound as a yellow oil, which crystallizes upon standing at 0  $^{\circ}\text{C}$ : mp 131-133  $^{\circ}\text{C}$ ;  $^1\text{H}$  NMR ( $\text{CDCl}_3$ )  $\delta$  2.25 (m, 2H), 2.50 (m, 1H), 2.93 (dt,  $J$  = 16.4, 4.8 Hz, 1H), 3.76 (s, 3H), 4.03 (m, 1H), 4.23 (m, 1H), 5.86 (s, 1H), 6.82 (d,  $J$  = 8.4 Hz, 2H), 7.23 (d,  $J$  = 8.4 Hz, 2H), 7.29 (t,  $J$  = 8.0 Hz, 1H), 7.33 (d,  $J$  = 8.0 Hz, 1H), 7.49 (d,  $J$  = 8.0 Hz, 1H), 8.12 (d,  $J$  = 8.0 Hz, 1H), 9.11 (s, 1H);  $^{13}\text{C}$  NMR ( $\text{CDCl}_3$ )  $\delta$  20.9, 21.7, 40.4, 55.3, 71.8, 108.8, 112.4, 113.9, 117.6, 120.4, 121.3, 121.4, 126.6, 128.8, 136.0, 138.2, 140.7, 143.2, 150.9, 159.0; IR (neat,  $\text{cm}^{-1}$ ) 3321, 3005, 2930, 1473; HRMS calcd for  $\text{C}_{22}\text{H}_{20}\text{N}_2\text{O}_2$ : 344.1525. Found: 344.1531.

**Ethyl 3-(5,6-dihydro-4H-indolo[3,2,1-*ij*]-1,6-naphthyridin-3-yl)benzoate (4d).** The mixture was chromatographed using 12:1  $\text{CHCl}_3/\text{MeOH}$  to afford 83 mg (93%) of the indicated compound as a yellow oil:  $^1\text{H}$  NMR ( $\text{CDCl}_3$ )  $\delta$  1.41 (t,  $J$  = 7.2 Hz, 3H), 2.27 (quintet,  $J$  = 6.0 Hz, 2H), 3.17 (t,  $J$  = 6.0 Hz, 2H), 4.25 (t,  $J$  = 6.0 Hz, 2H), 4.41 (q,  $J$  = 7.2 Hz, 2H), 7.33 (t,  $J$  = 7.2 Hz, 1H), 7.43 (d,  $J$  = 8.0 Hz, 1H), 7.50-7.58 (m, 2H), 7.94 (d,  $J$  = 8.0 Hz, 1H), 8.09 (d,  $J$  = 8.0 Hz, 1H), 8.17 (d,  $J$  = 8.0 Hz, 1H), 8.39 (s, 1H), 9.24 (s, 1H);  $^{13}\text{C}$  NMR ( $\text{CDCl}_3$ )  $\delta$  14.4, 22.5, 23.6,



40.8, 61.1, 108.8, 113.9, 117.0, 120.4, 121.3, 121.4, 126.5, 128.4, 128.5, 128.8, 130.4, 133.9, 140.4, 140.5, 140.6, 143.0, 149.5, 166.7; IR (neat,  $\text{cm}^{-1}$ ) 3055, 2952, 1716; HRMS calcd for  $\text{C}_{23}\text{H}_{20}\text{N}_2\text{O}_2$ : 356.1525. Found: 356.1532.

**3-(5-Pyrimidin-5-yl)-5,6-dihydro-4H-indolo[3,2,1-*ij*]-1,6-naphthyridine (4e).** The mixture was chromatographed using 12:1  $\text{CHCl}_3/\text{MeOH}$  to afford 71 mg (99%) of the indicated compound as a yellow solid: mp 217-218  $^{\circ}\text{C}$ ;  $^1\text{H}$  NMR ( $\text{CDCl}_3$ )  $\delta$  2.33 (quintet,  $J = 5.6$  Hz, 2H), 3.20 (t,  $J = 5.6$  Hz, 2H), 4.29 (t,  $J = 5.6$  Hz, 2H), 7.24-7.31 (m, 2H), 7.36 (t,  $J = 7.6$  Hz, 1H), 7.46 (d,  $J = 7.6$  Hz, 1H), 7.57 (t,  $J = 7.6$  Hz, 1H), 8.19 (d,  $J = 7.6$  Hz, 1H), 9.14 (s, 2H), 9.26 (s, 2H);  $^{13}\text{C}$  NMR ( $\text{CDCl}_3$ )  $\delta$  22.4, 23.4, 40.8, 109.0, 114.8, 117.6, 120.8, 121.1, 121.6, 127.0, 133.6, 140.6, 141.1, 142.8, 143.8, 157.0, 157.5; IR (neat,  $\text{cm}^{-1}$ ) 3043, 2958, 2866; HRMS calcd for  $\text{C}_{18}\text{H}_{14}\text{N}_4$ : 286.1219. Found: 286.1223.

**3-Phenyl-4,5,6,7-tetrahydro-2,7-diazacyclohept[1,2,3-*ijk*]-fluorene (4f).** The mixture was chromatographed using 1:1 hexanes/EtOAc to afford 69 mg (90%) of the indicated compound as a yellow solid: mp 164-166  $^{\circ}\text{C}$ ;  $^1\text{H}$  NMR ( $\text{CDCl}_3$ )  $\delta$  2.10 (quintet,  $J = 6.0$  Hz, 2H), 2.27 (quintet,  $J = 6.0$  Hz, 2H), 3.18 (t,  $J = 6.0$  Hz, 2H), 4.40 (t,  $J = 6.0$  Hz, 2H), 7.31 (t,  $J = 7.6$  Hz, 1H), 7.37-7.53 (m, 5H), 7.55-7.59 (m, 2H), 8.14 (d,  $J = 7.6$  Hz, 1H), 9.20 (s, 1H);  $^{13}\text{C}$  NMR ( $\text{CDCl}_3$ )  $\delta$  26.9, 28.2, 29.1, 45.0, 109.5, 118.6, 119.2, 120.5, 120.6, 121.6, 126.5, 127.6, 128.1, 129.7, 140.0, 141.6, 141.9, 146.6, 154.2; IR (neat,  $\text{cm}^{-1}$ ) 3056, 2931, 1585; HRMS calcd for  $\text{C}_{21}\text{H}_{18}\text{N}_2$ : 298.1470. Found: 298.1475.

**3-*n*-Hexyl-4,5-dihydrobenzo[*b*]pyrido[3,4,5-*gh*]pyrrolizine (4g).** The mixture was chromatographed using 10:1  $\text{CHCl}_3/\text{MeOH}$  to afford 63 mg (91%) of the indicated compound as a yellow solid: mp 76-78  $^{\circ}\text{C}$ ;  $^1\text{H}$  NMR ( $\text{CDCl}_3$ )  $\delta$  0.88 (t,  $J = 7.2$  Hz, 3H), 1.25-1.45 (m, 6H), 1.79 (quintet,  $J = 7.8$  Hz, 2H), 2.87 (t,  $J = 7.5$  Hz, 2H), 3.82 (t,  $J = 7.5$  Hz, 2H), 4.53 (t,  $J = 7.5$  Hz, 2H), 7.25 (m, 1H), 7.35 (dd,  $J = 0.6, 7.5$  Hz, 1H), 7.43 (dt,  $J = 1.2, 8.1$  Hz, 1H), 8.04 (dd,  $J = 0.6, 8.1$  Hz, 1H), 8.93 (s, 1H);  $^{13}\text{C}$  NMR ( $\text{CDCl}_3$ )  $\delta$  14.3, 22.9, 29.5, 29.7, 32.0, 32.9, 36.1, 49.0, 110.6, 112.1, 117.2, 120.2, 123.1, 125.9, 126.5, 140.5, 140.7, 151.4, 158.0;

IR (neat,  $\text{cm}^{-1}$ ) 3051, 2953, 2853; HRMS calcd for  $\text{C}_{19}\text{H}_{22}\text{N}_2$ : 278.1783. Found: 278.1787.

**1-Phenyl-9H-benzo[*c*]indolo[3,2,1-*h*]-1,6-naphthyridine (4h).** The mixture was chromatographed using 1:1 hexanes/EtOAc to afford 72 mg (88%) of the indicated compound as a white solid: mp 234-235 °C;  $^1\text{H}$  NMR ( $\text{CDCl}_3$ )  $\delta$  5.52 (s, 2H), 7.01 (t,  $J$  = 8.0 Hz, 1H), 7.19-7.26 (m, 2H), 7.30 (d,  $J$  = 8.0 Hz, 1H), 7.39 (t,  $J$  = 7.6 Hz, 1H), 7.46-7.52 (m, 4H), 7.57 (t,  $J$  = 7.6 Hz, 1H), 7.65 (dd,  $J$  = 1.6, 8.0 Hz, 2H), 8.17 (d,  $J$  = 8.0 Hz, 1H), 9.15 (s, 1H);  $^{13}\text{C}$  NMR ( $\text{CDCl}_3$ )  $\delta$  45.7, 109.3, 112.2, 117.3, 121.2, 121.5, 122.0, 126.6, 127.1, 127.5, 127.7, 128.0, 128.3, 128.8, 129.0, 129.2, 129.4, 130.6, 140.5, 140.8, 142.0, 143.6; IR (neat,  $\text{cm}^{-1}$ ) 3057, 2934, 2841; HRMS calcd for  $\text{C}_{24}\text{H}_{16}\text{N}_2$ : 332.1314. Found: 332.1320.

**3-Phenyl-4,5,6,7-tetrahydrocyclopenta[*c*]indolo[3,2,1-*h*]-1,6-naphthyridine (4i).** The mixture was chromatographed using 10:1  $\text{CHCl}_3/\text{MeOH}$  to afford 76 mg (94%) of the indicated compound as a yellow solid: mp 184-185 °C;  $^1\text{H}$  NMR ( $\text{CDCl}_3$ )  $\delta$  1.89 (quintet,  $J$  = 7.2 Hz, 2H), 2.10 (m, 2H), 2.41 (m, 2H), 5.02 (s, 2H), 7.30-7.52 (m, 8H), 8.11 (d,  $J$  = 7.6 Hz, 1H), 9.03 (s, 1H);  $^{13}\text{C}$  NMR ( $\text{CDCl}_3$ )  $\delta$  23.0, 33.4, 34.3, 45.4, 109.0, 112.1, 115.6, 120.9, 121.4, 122.3, 126.1, 127.5, 127.7, 129.9, 130.8, 135.5, 140.0, 141.2, 141.6, 142.6, 149.0; IR (neat,  $\text{cm}^{-1}$ ) 3055, 2957, 2841; HRMS calcd for  $\text{C}_{23}\text{H}_{18}\text{N}_2$ : 322.1470. Found: 322.1476.

**2-Phenyl-2,4,5,6-tetrahydro-1H-6-azabenzocyclopenta[*c*]azulen-1-one (5a).** To a 4-dram vial were added 2-bromo-1-(6-phenylhex-5-ynyl)-1H-indole-3-carboxaldehyde (**3f**, 0.25 mmol),  $\text{Pd}(\text{OAc})_2$  (5 mol %),  $n\text{-Bu}_4\text{NCl}$  (0.25 mmol),  $\text{Na}_2\text{CO}_3$  (1.0 mmol) and DMA (5 mL). The mixture was flushed with Ar and heated at 100 °C for 8 h. The completion of the reaction was established by the observation of palladium black. The mixture was diluted with EtOAc (30 mL), washed with satd aq  $\text{NH}_4\text{Cl}$  ( $3 \times 10$  mL) and dried over anhydrous  $\text{Na}_2\text{SO}_4$ . The solvent was evaporated and the residue was purified by chromatography on a silica gel column. The mixture was chromatographed using 1:1 hexanes/EtOAc to afford 36 mg (48%) of the indicated compound as an off-white solid: mp 231-233 °C;  $^1\text{H}$  NMR ( $\text{CDCl}_3$ )  $\delta$  2.32 (m, 2H), 2.67 (m, 2H), 4.30 (t,  $J$  = 5.2 Hz, 2H),

4.50 (s, 1H), 5.78 (t,  $J$  = 5.2 Hz, 1H), 7.20-7.36 (m, 8H), 7.97 (d,  $J$  = 7.8 Hz, 1H);  $^{13}\text{C}$  NMR ( $\text{CDCl}_3$ )  $\delta$  25.8, 30.7, 46.7, 62.6, 110.2, 119.7, 121.7, 122.1, 122.6, 124.4, 127.0, 127.9, 128.5, 128.6, 132.0, 138.9, 143.8, 160.9, 192.0; IR (neat,  $\text{cm}^{-1}$ ) 3055, 2923, 1683; HRMS calcd for  $\text{C}_{21}\text{H}_{17}\text{NO}$ : 299.1310. Found: 299.1314.

## References

1. Gilchrist, T. L.; Kemmitt, P. D.; Germain, A. L. *Tetrahedron* **1997**, *53*, 4447.  
We used ethyl acetate instead of diethyl ether as the extraction solvent and were able to isolate 2-bromo-1*H*-indole-3-carboxaldehyde in 55% yield.
2. Sudo, T.; Asao, N.; Yamamoto, Y. *J. Org. Chem.* **2000**, *65*, 8919.
3. Roesch, K. R.; Larock, R. C. *J. Org. Chem.* **2001**, *66*, 412.
4. Padwa, A.; Krumple, K. E.; Weingarten, M. D. *J. Org. Chem.* **1995**, *60*, 5595.
5. Saulnier, M. G.; Kadow, J. F.; Tun, M. M.; Langley, D. R.; Vyas, D. M. *J. Am. Chem. Soc.* **1989**, *111*, 8320.
6. Baker, M. V.; Brown, D. H.; Skelton, B. W.; White, A. H. *J. Chem. Soc., Dalton Trans.* **2000**, 4607.

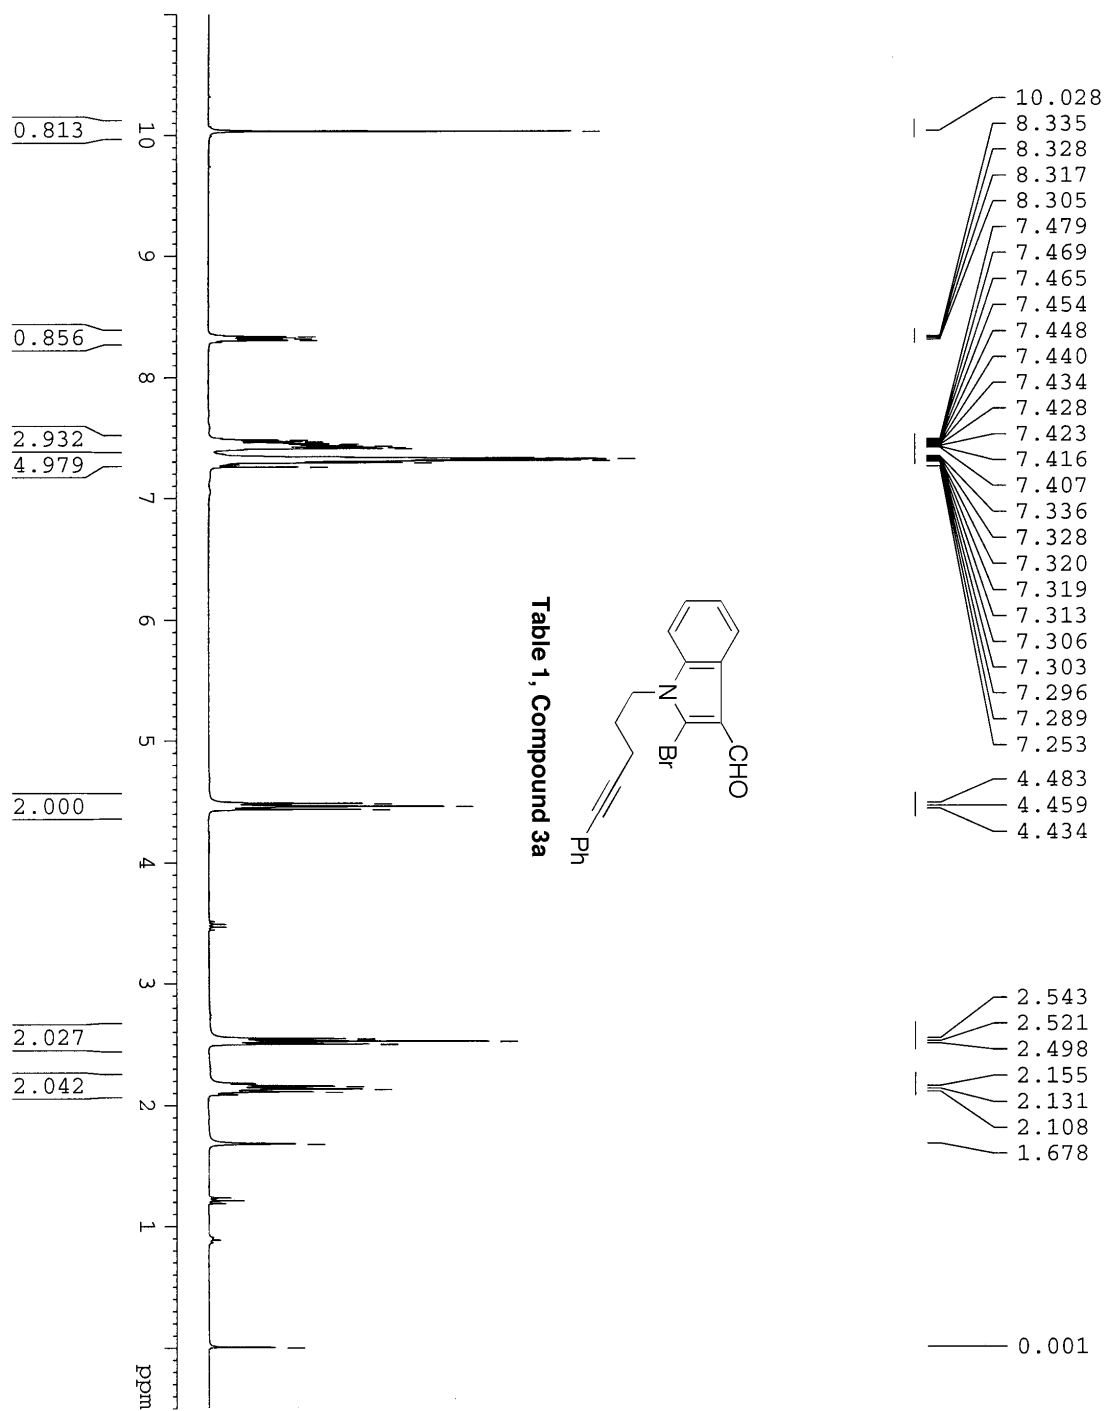

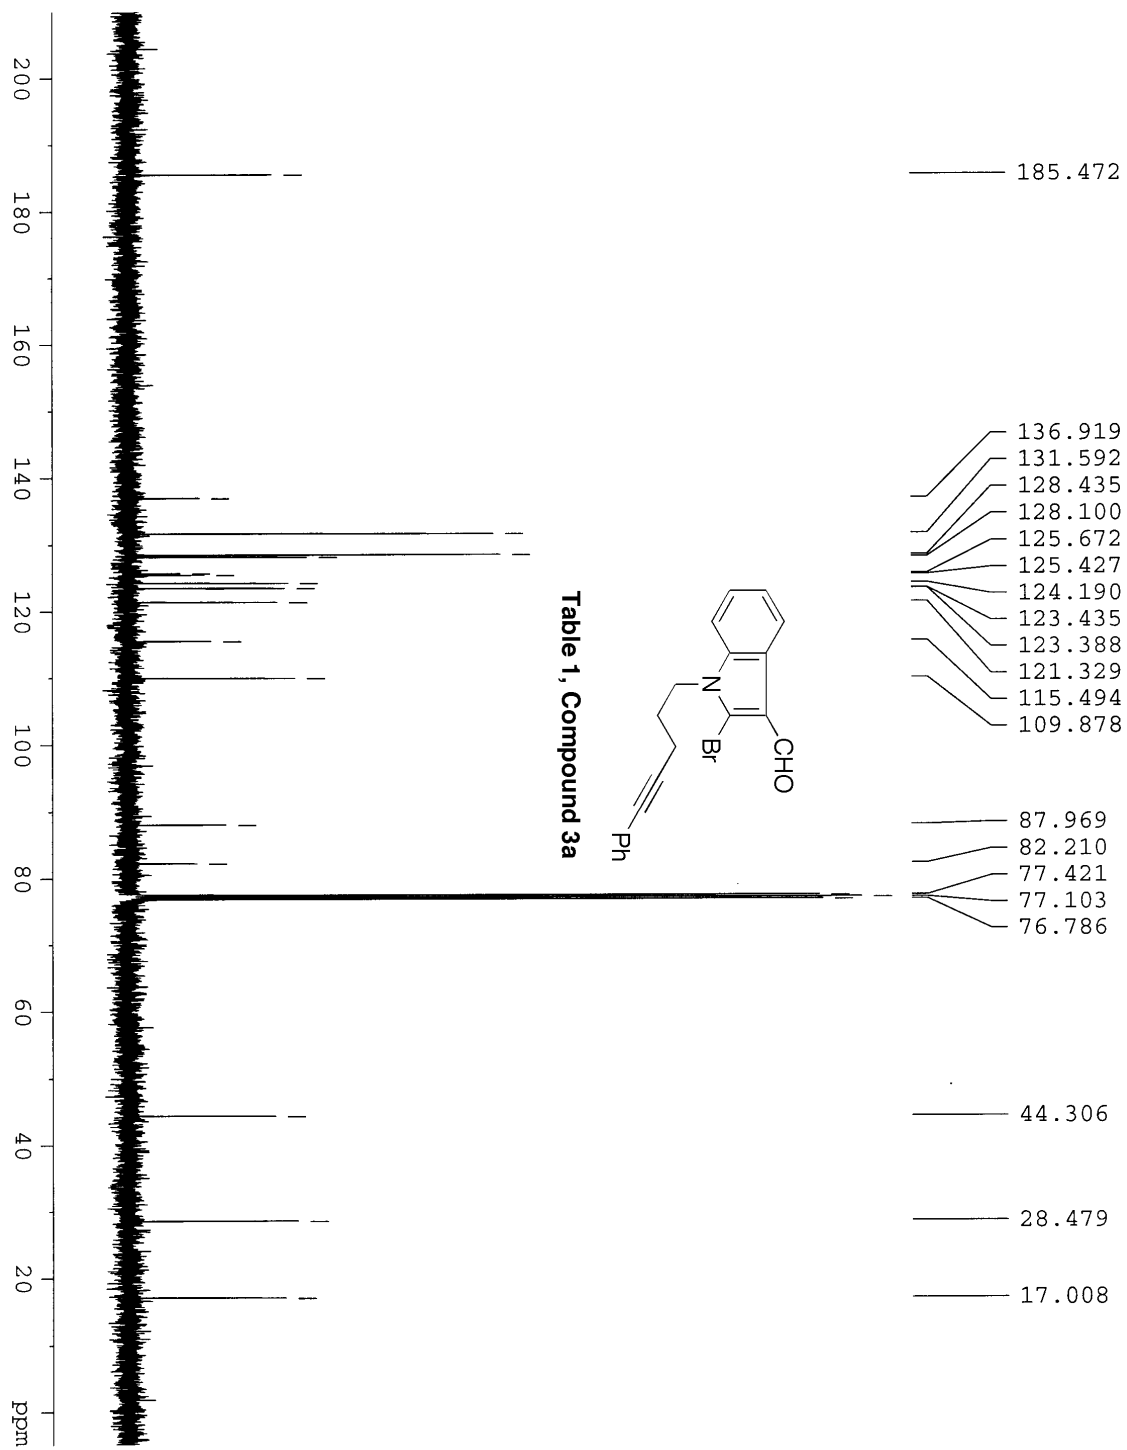

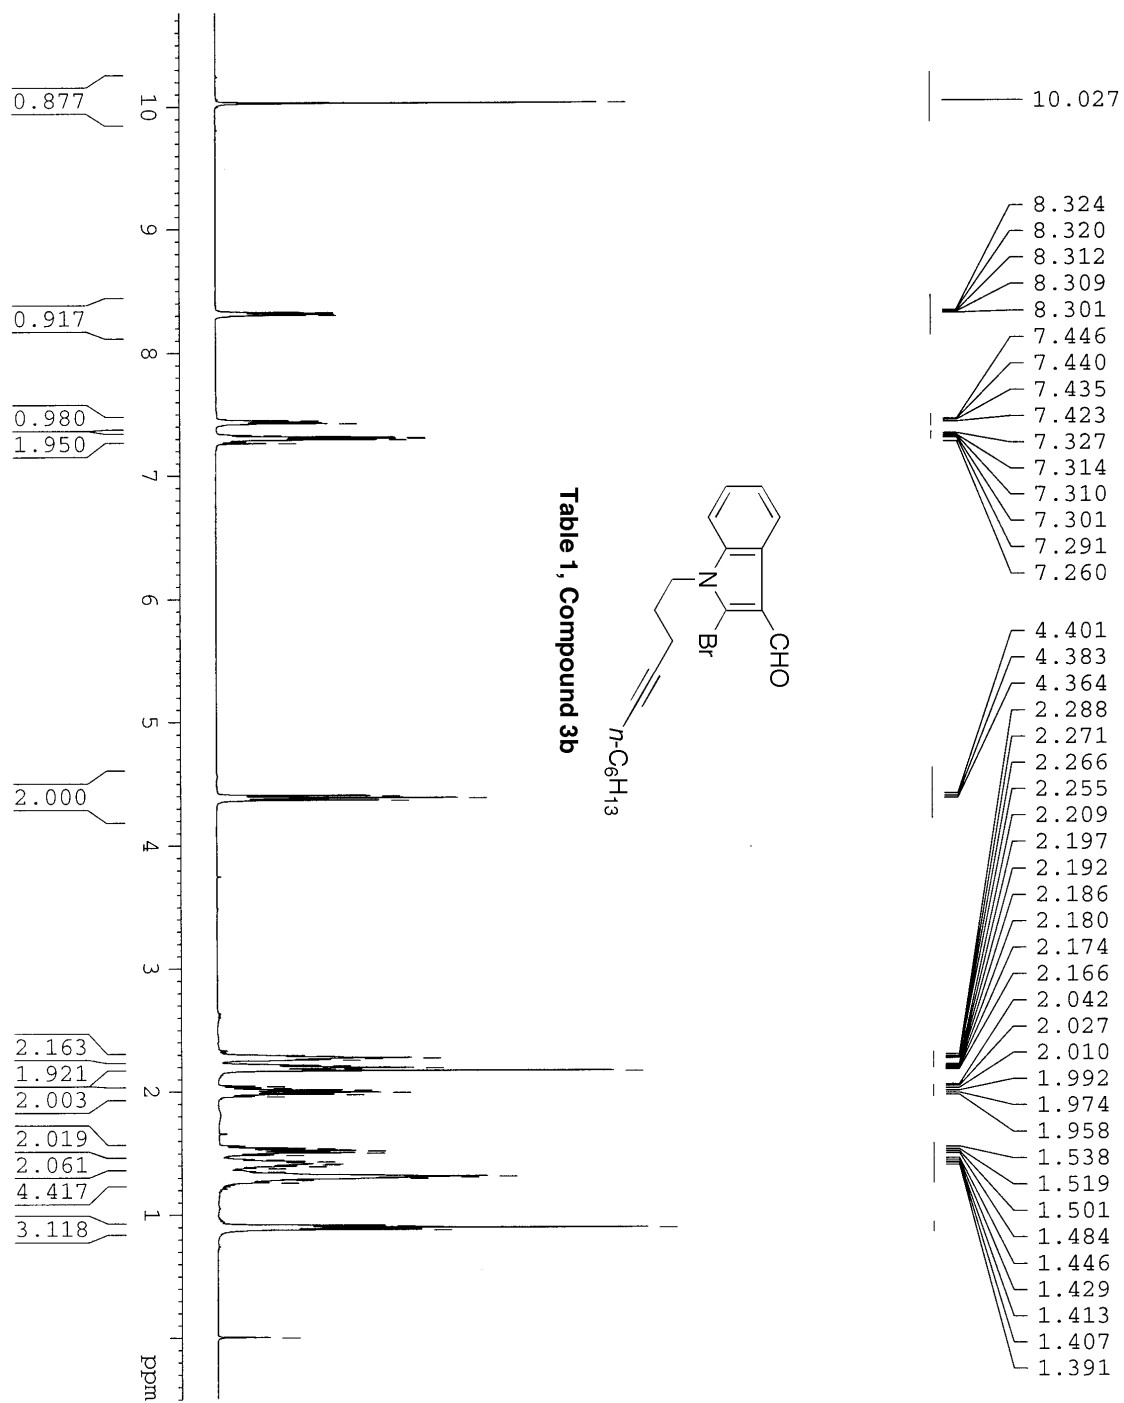

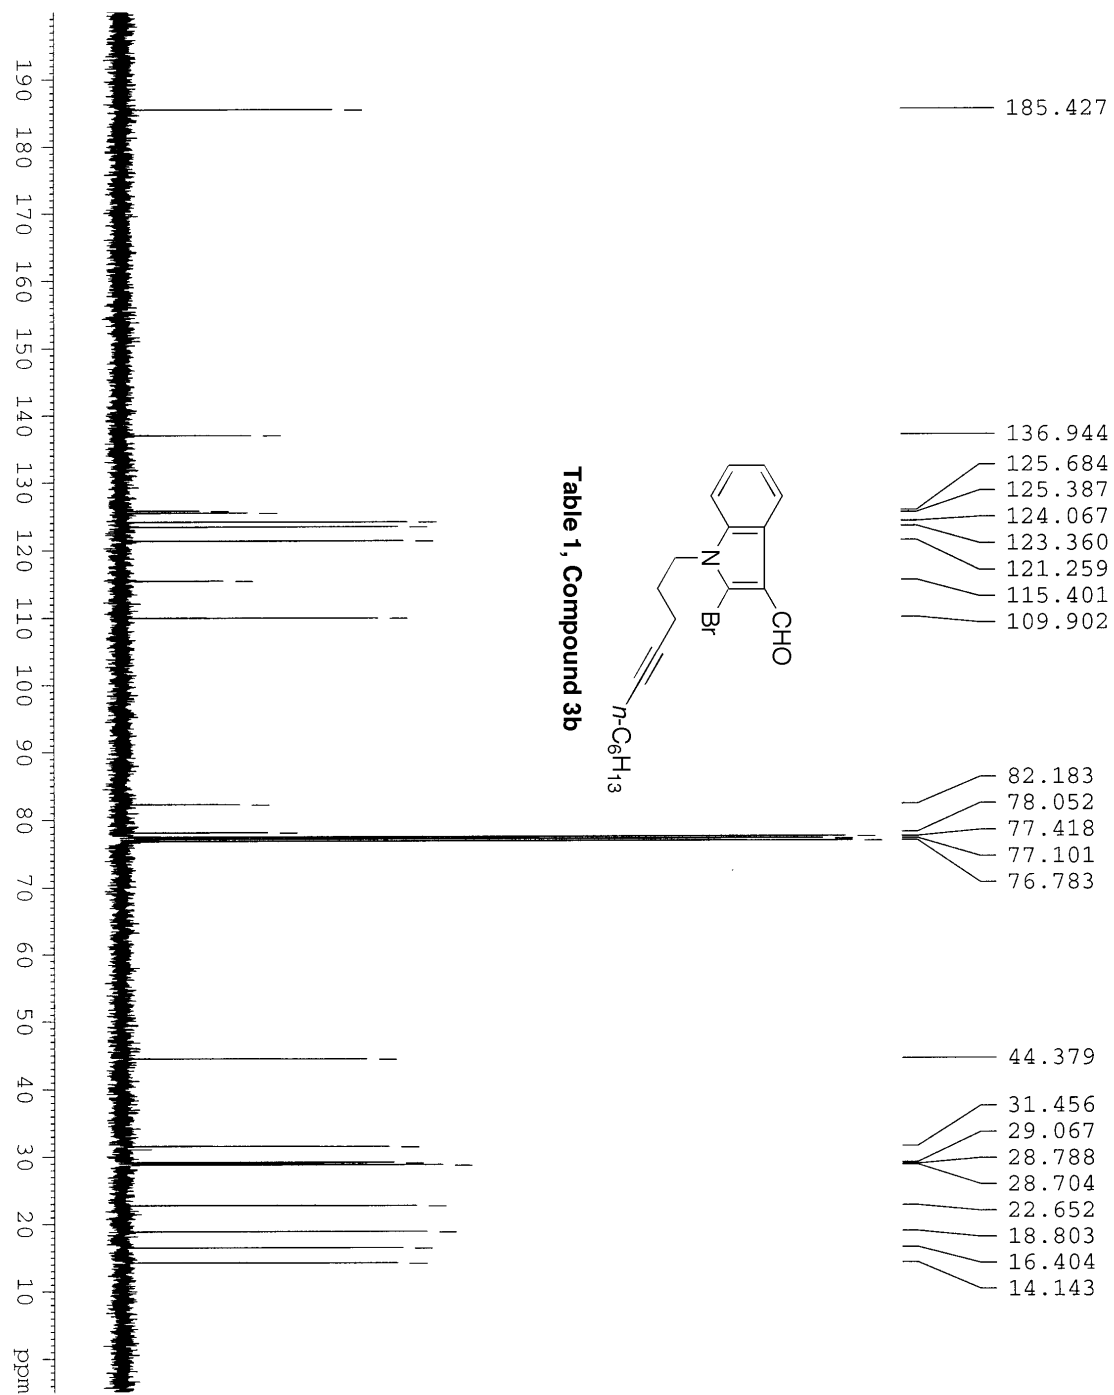

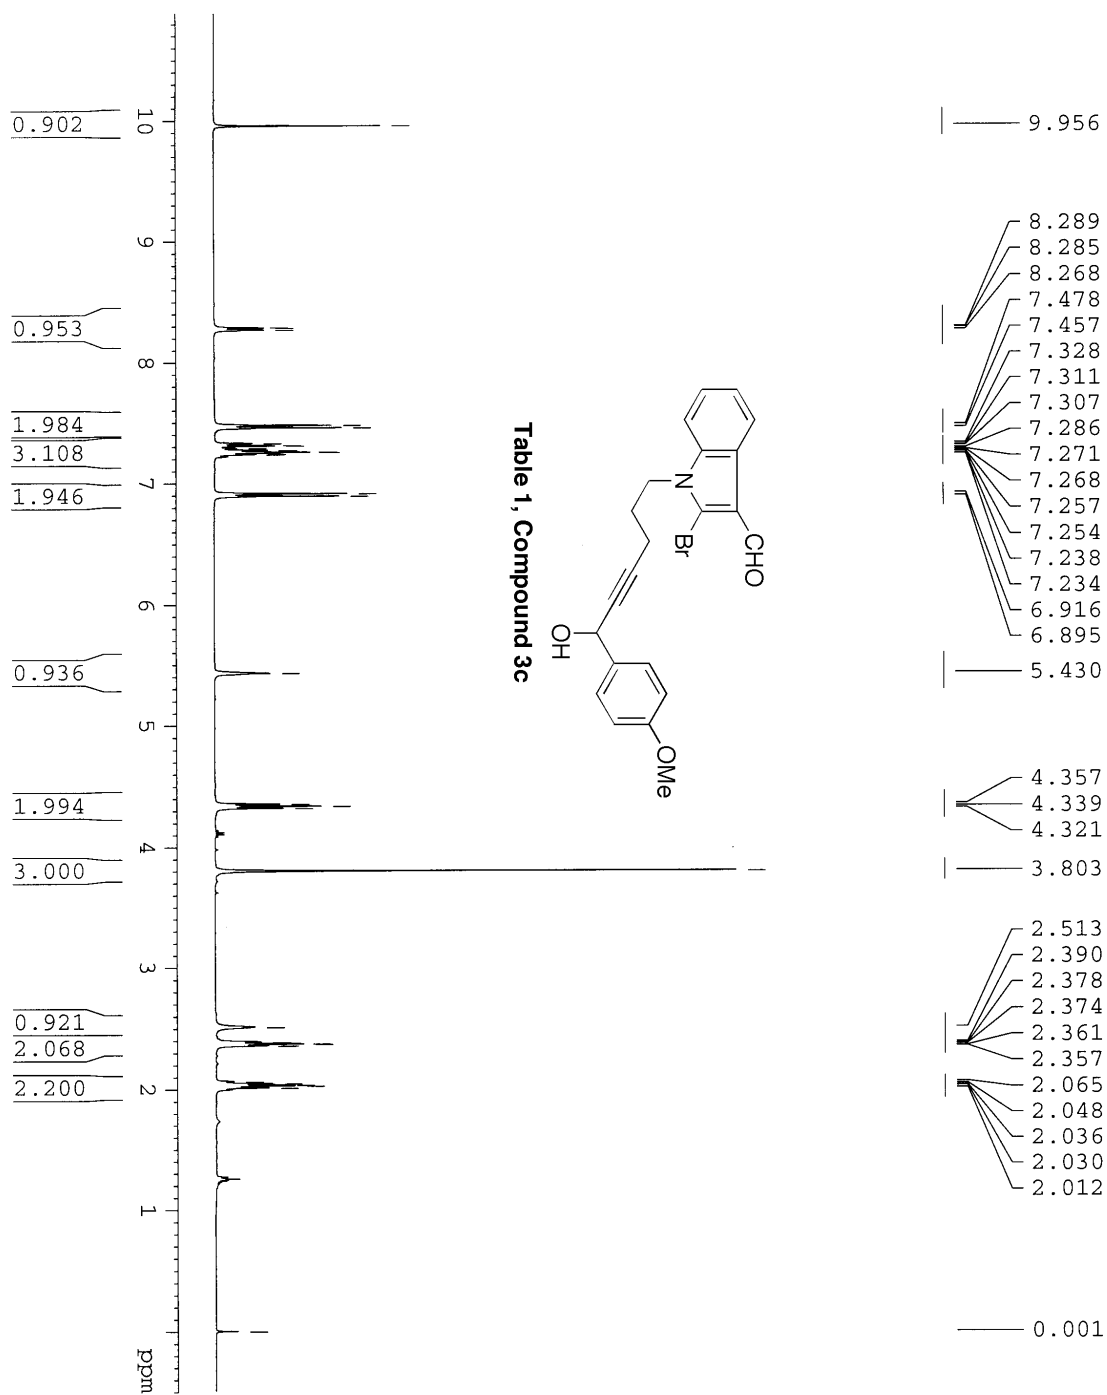



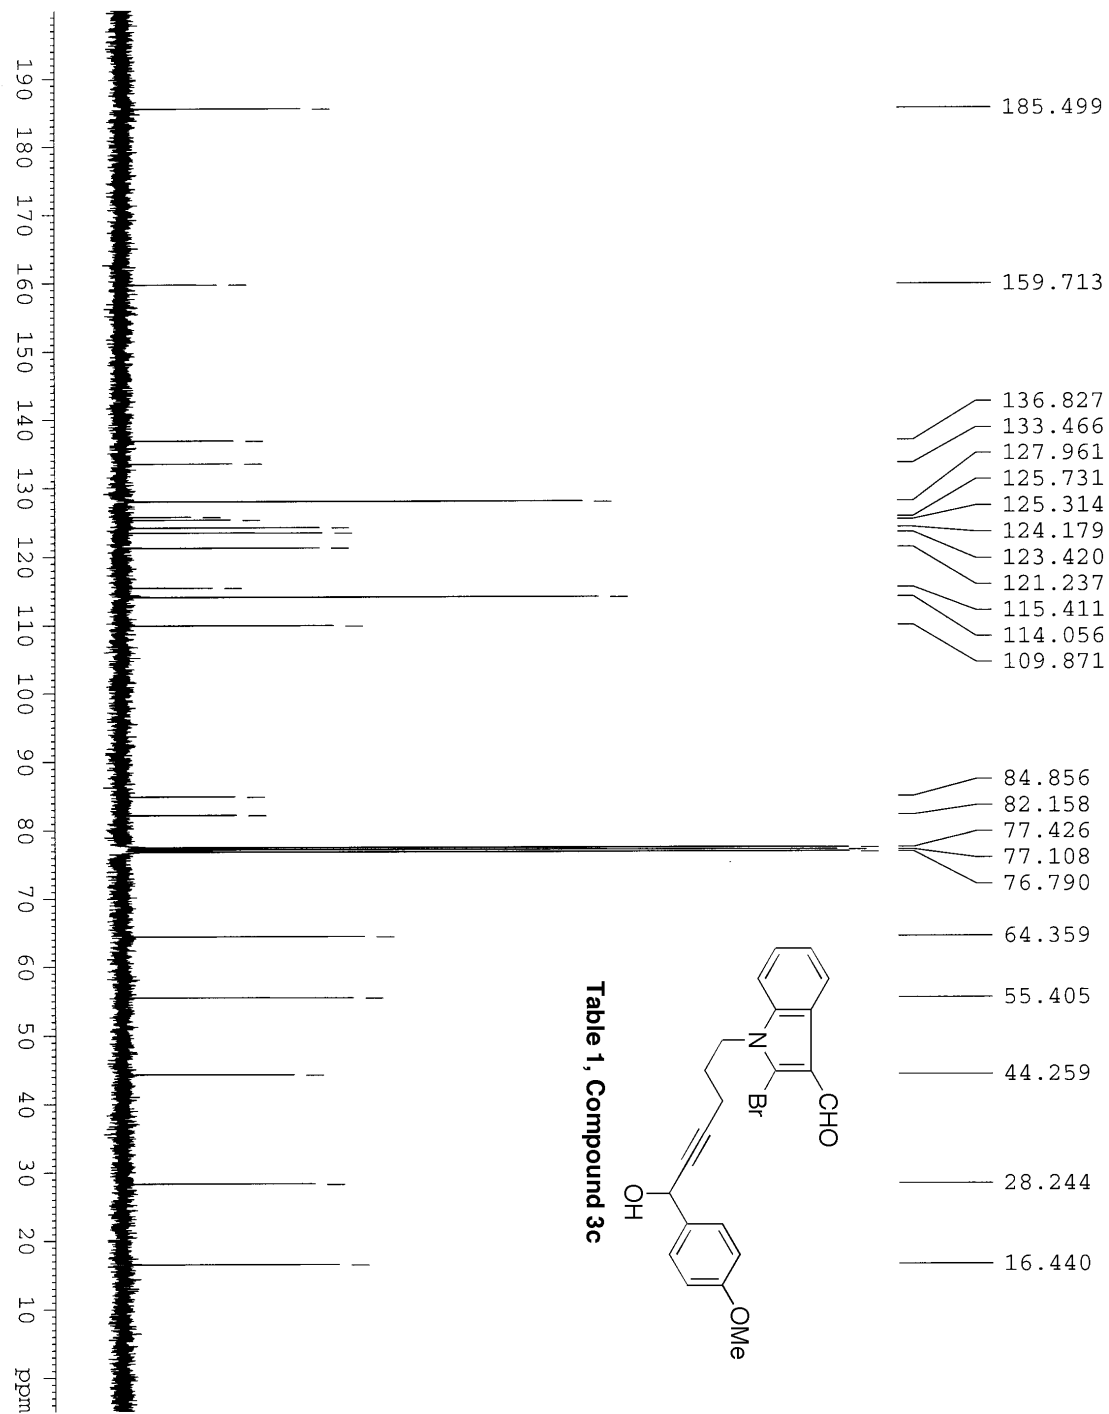

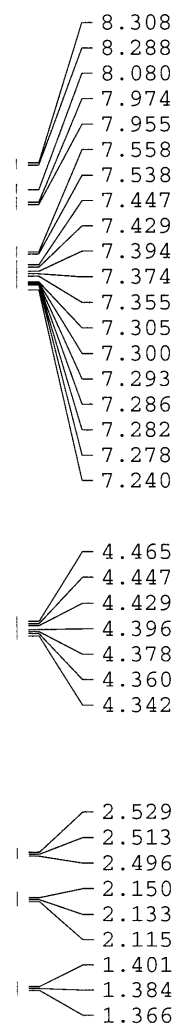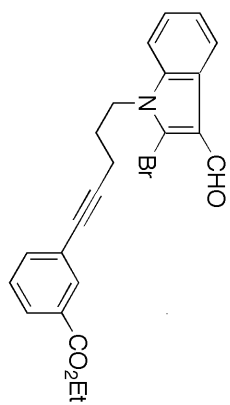

Table 1, Compound 3d

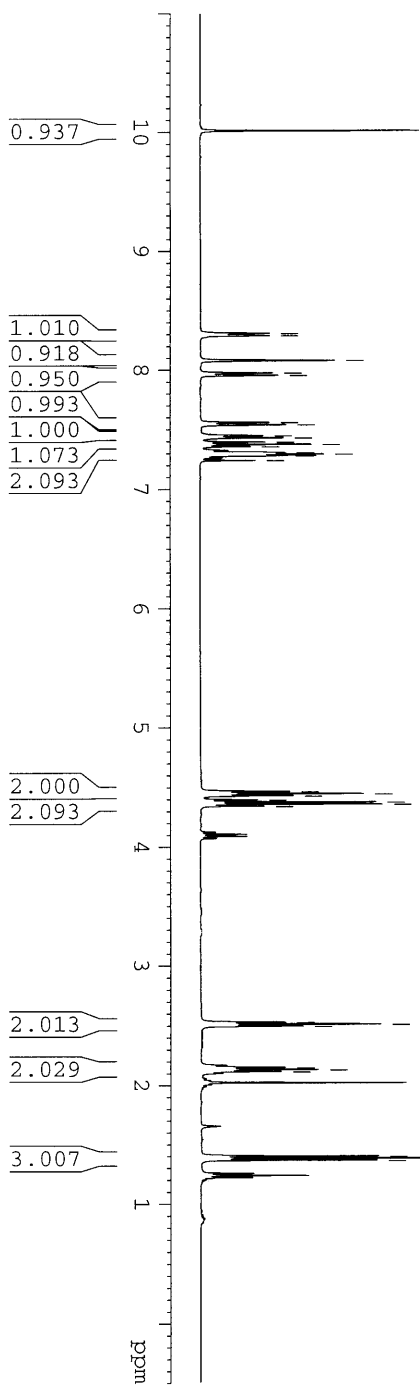

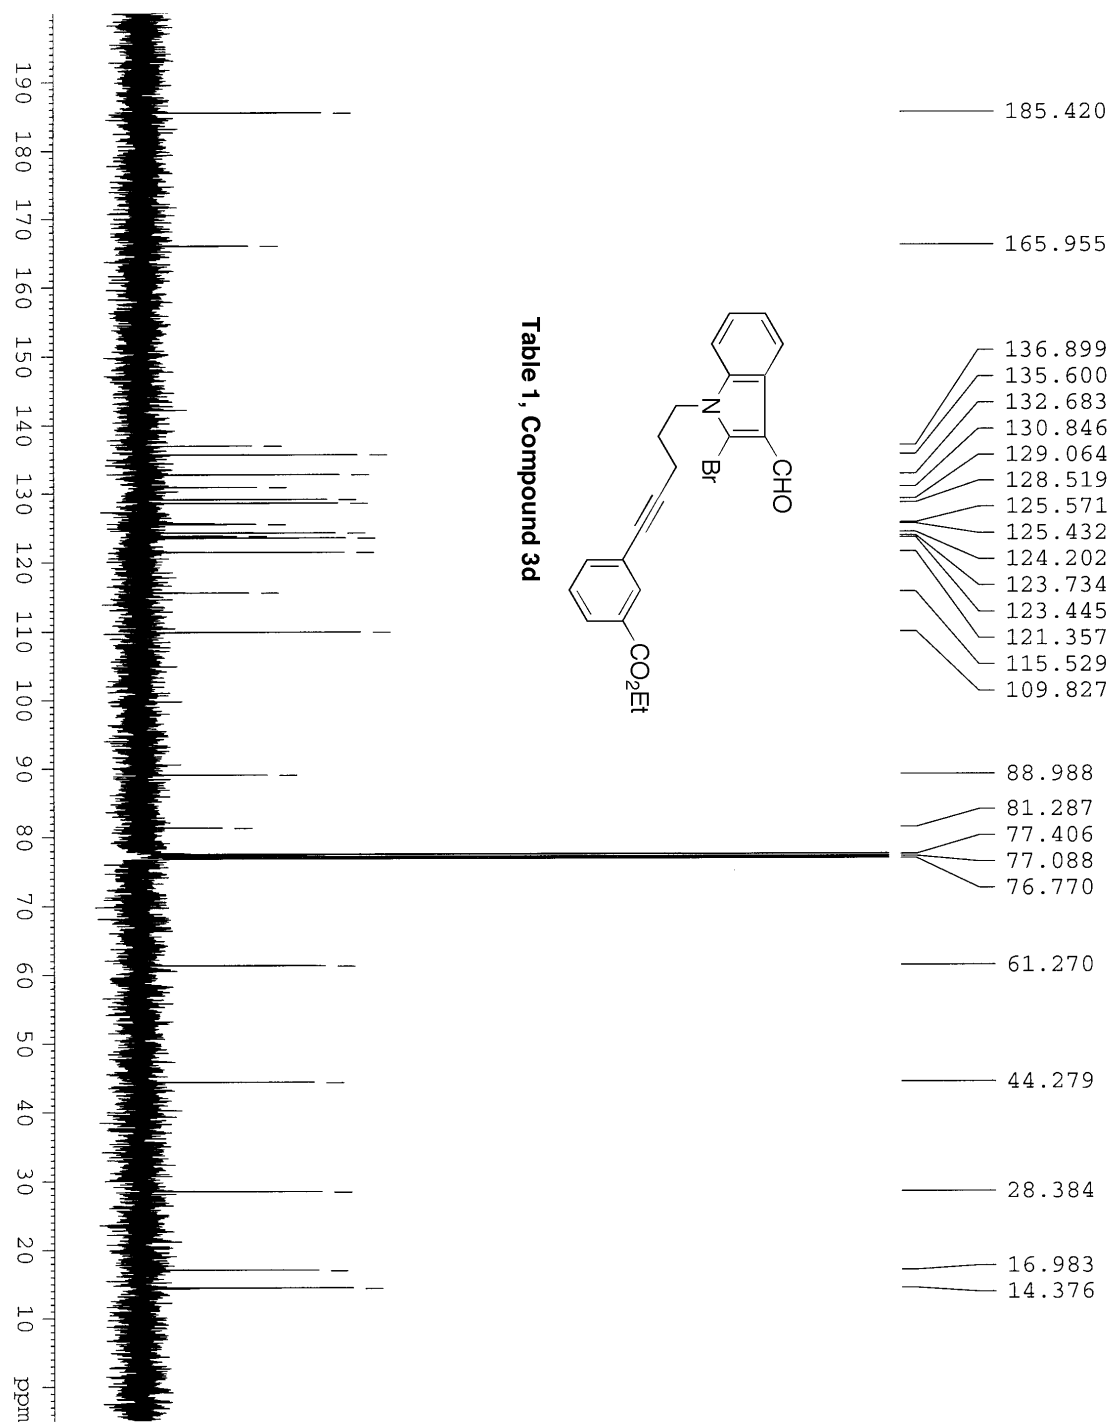

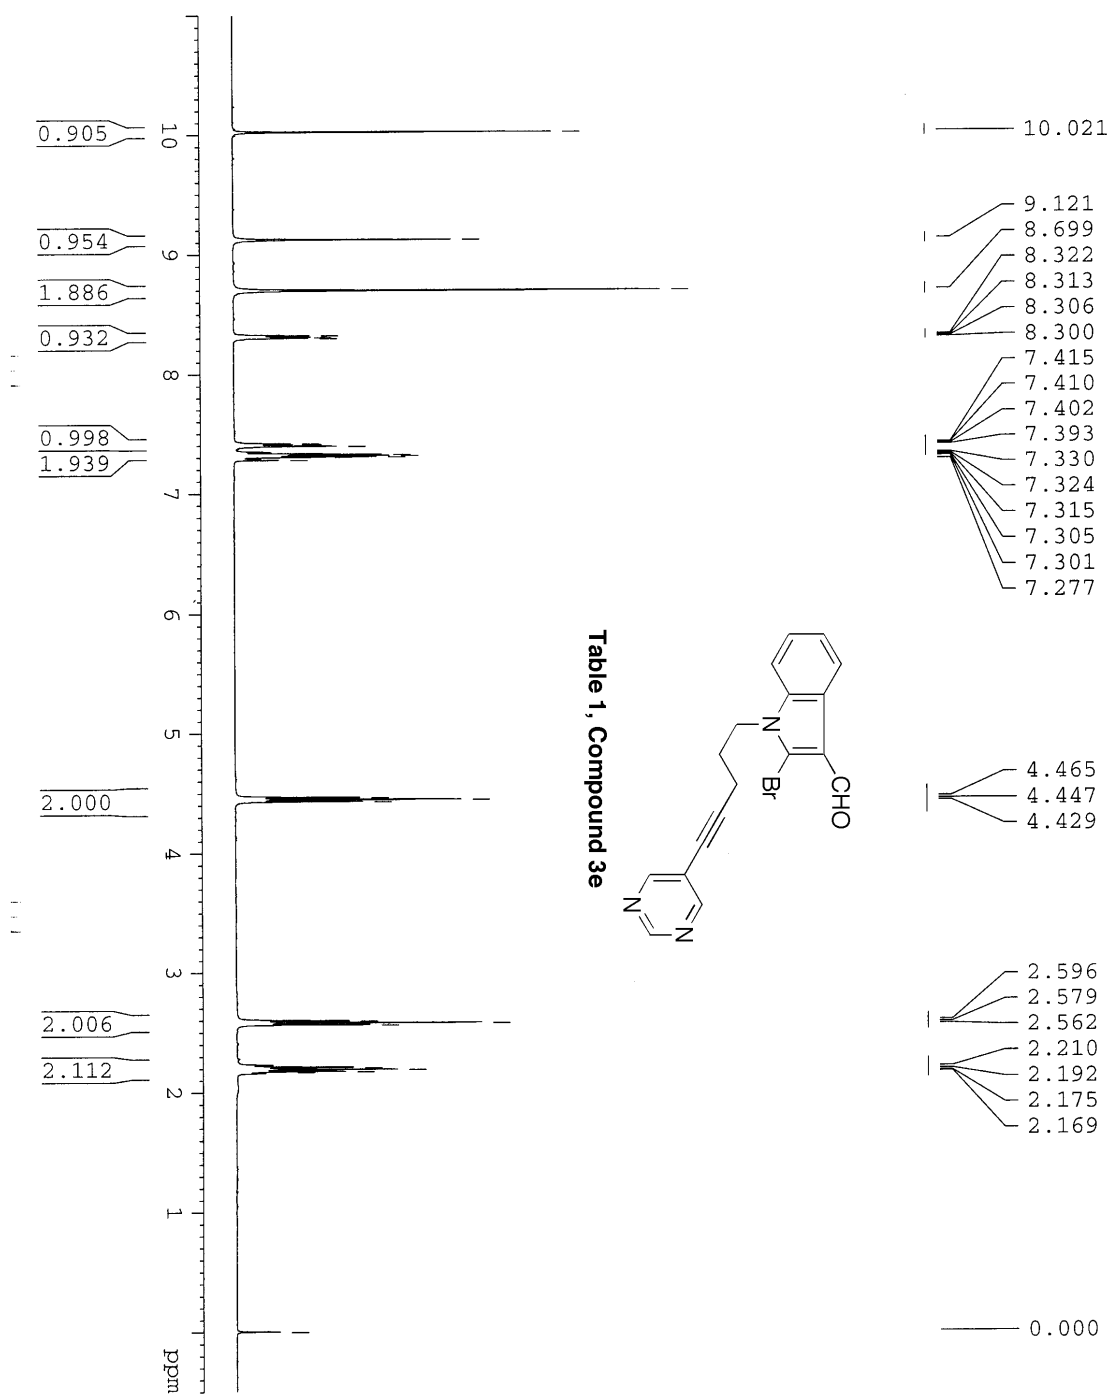

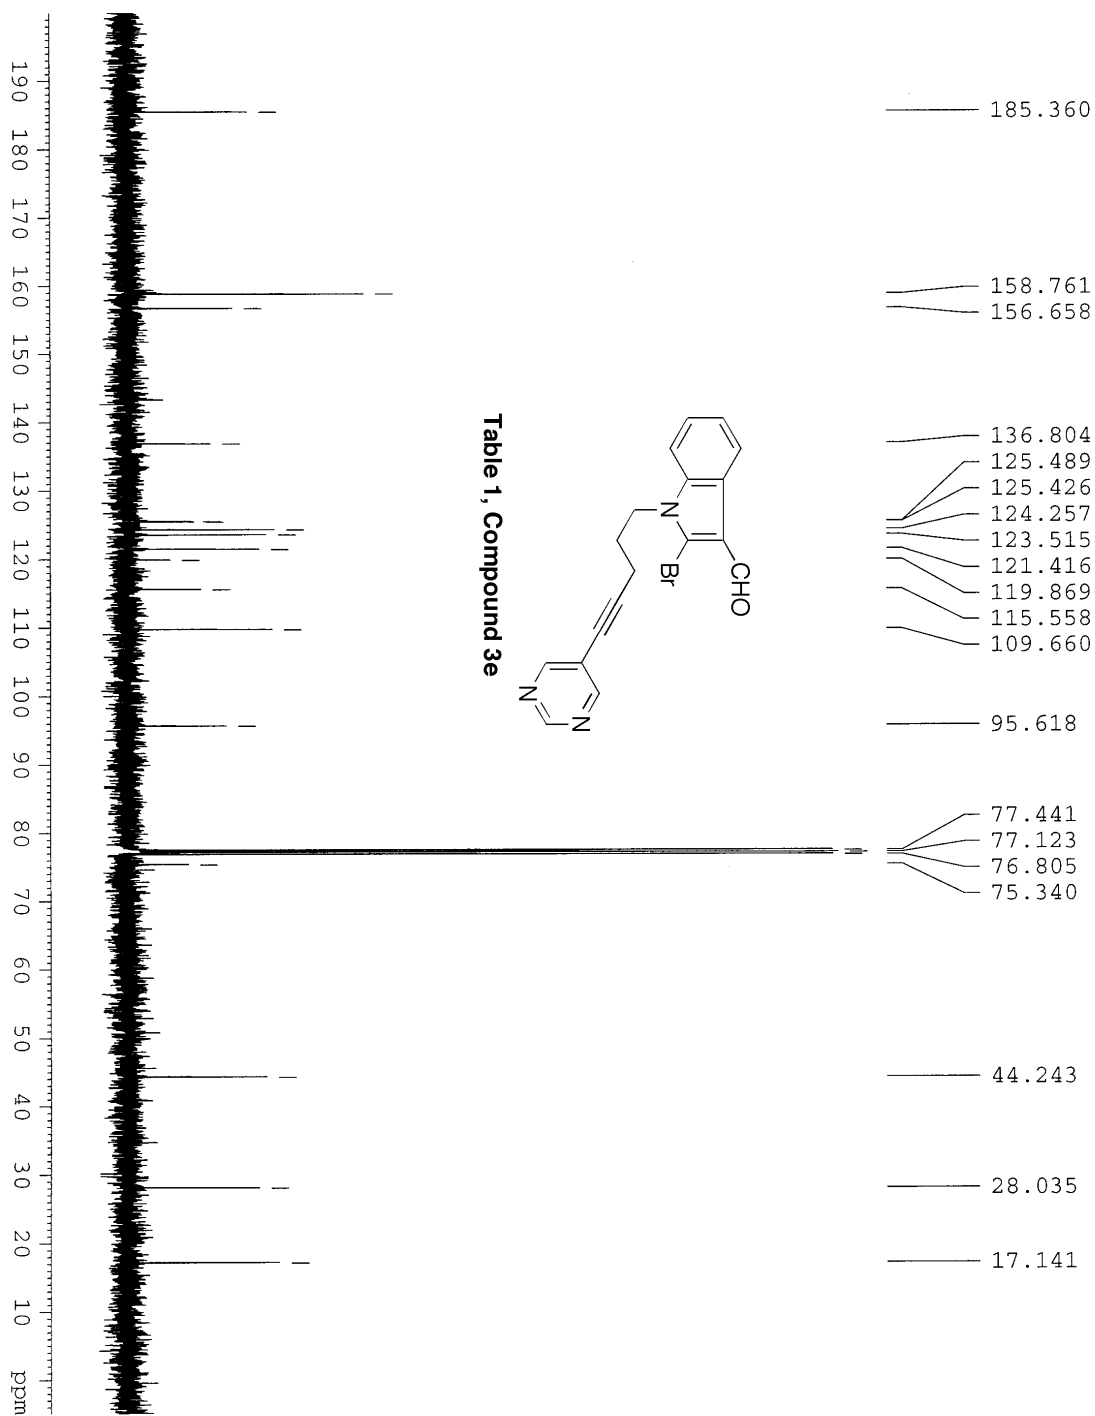

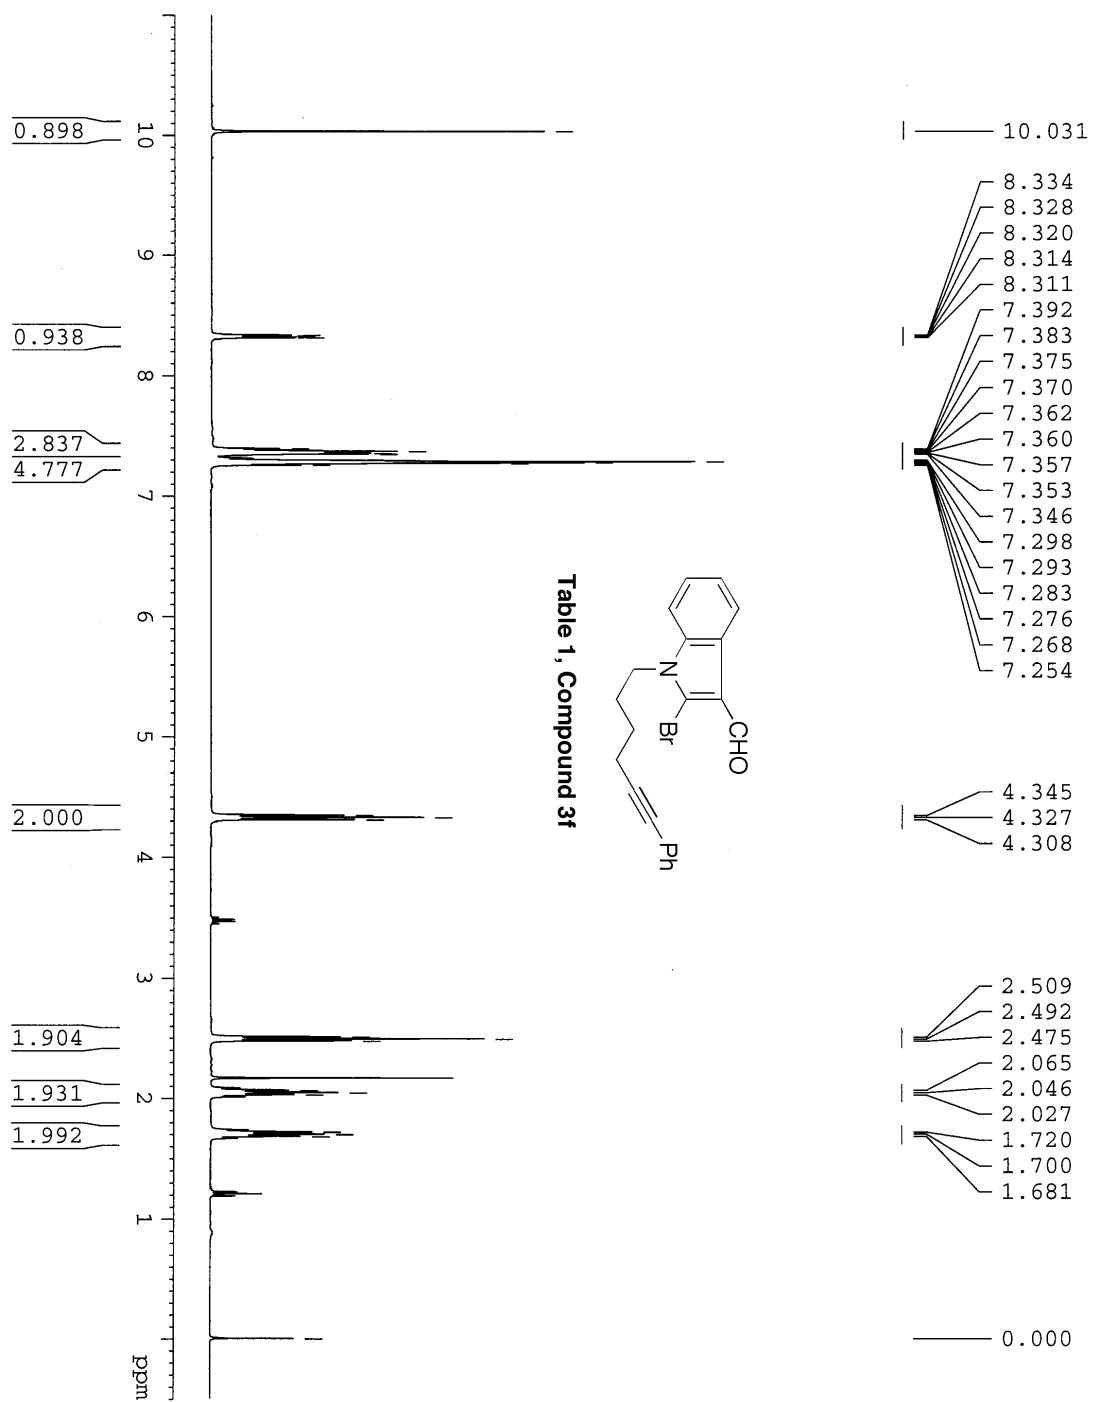

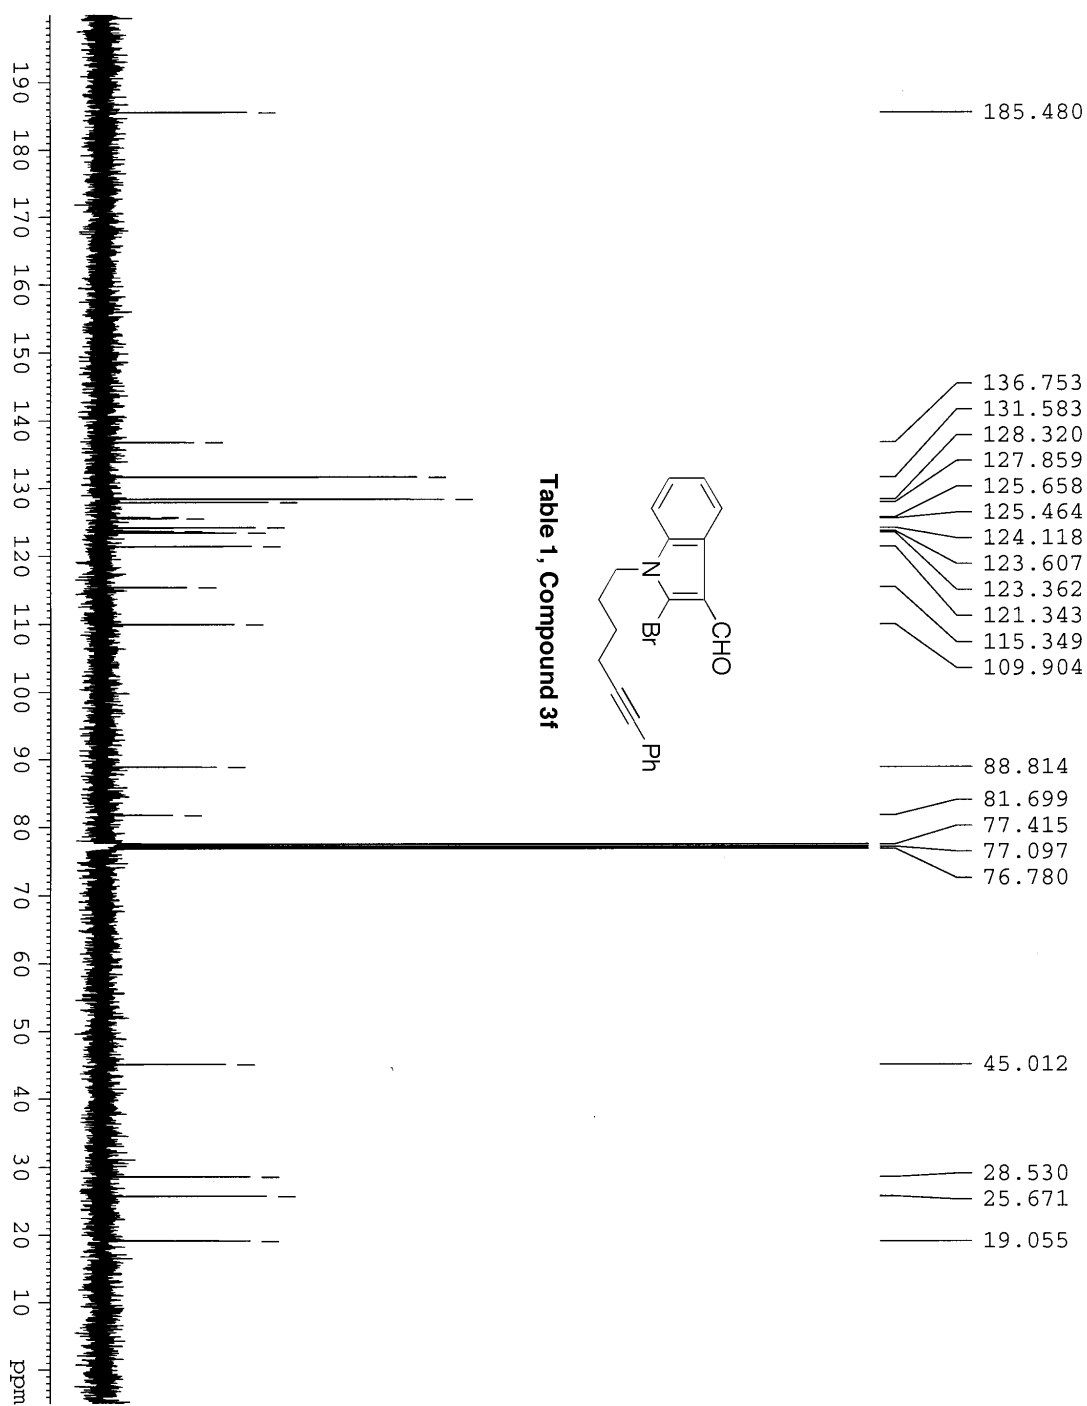

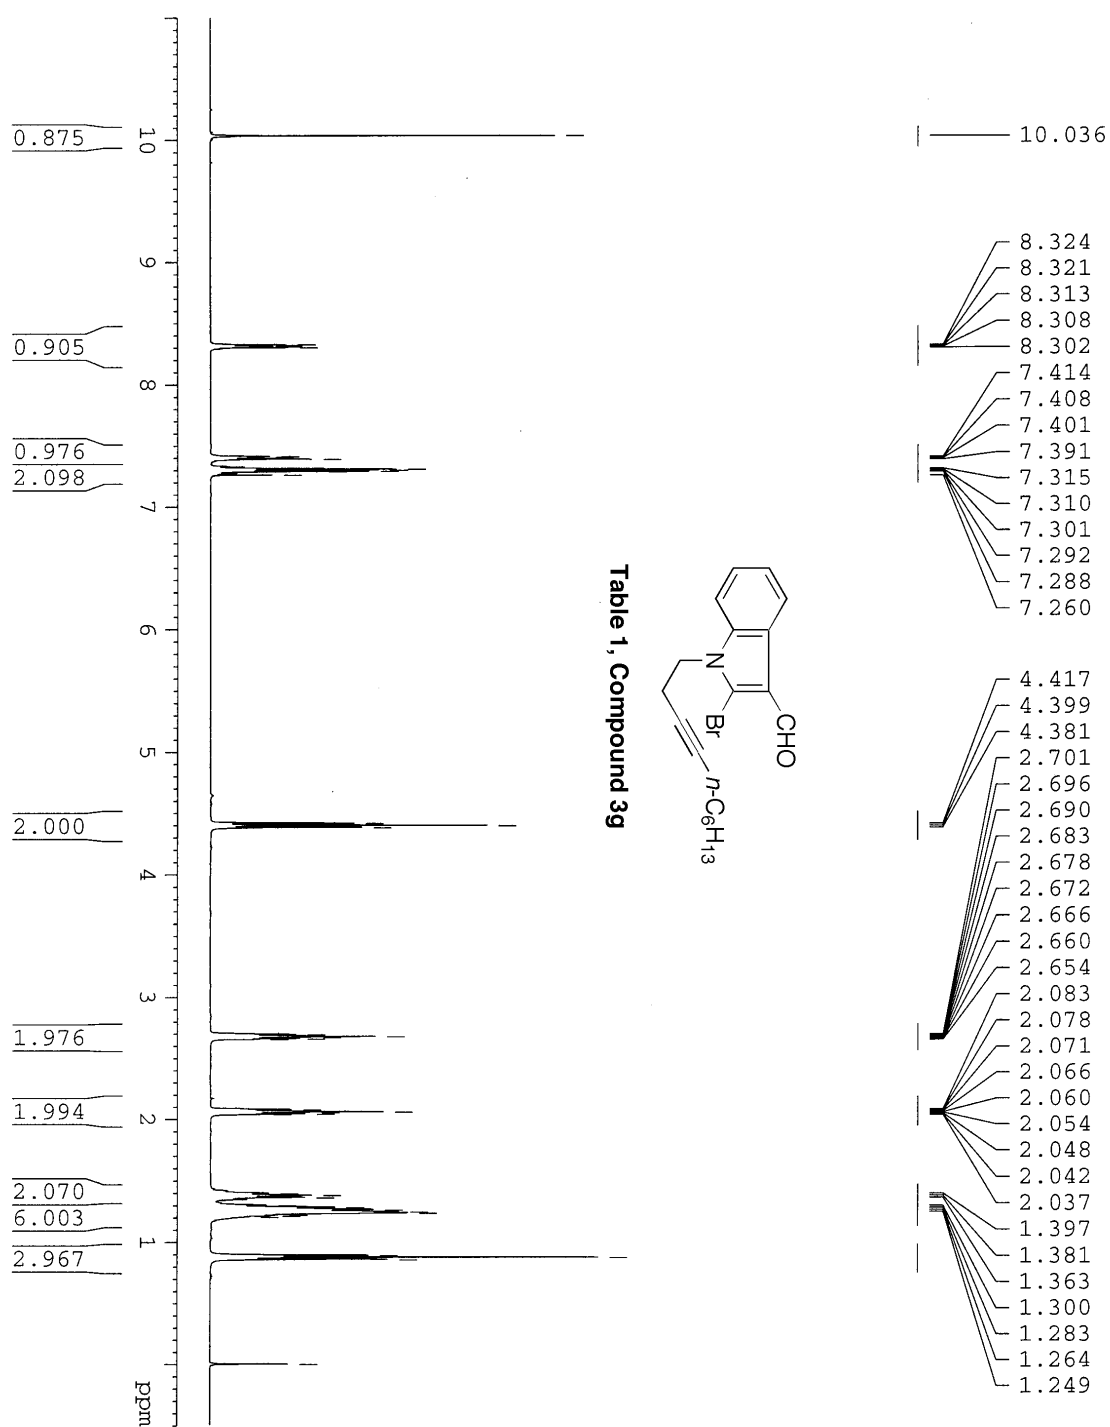



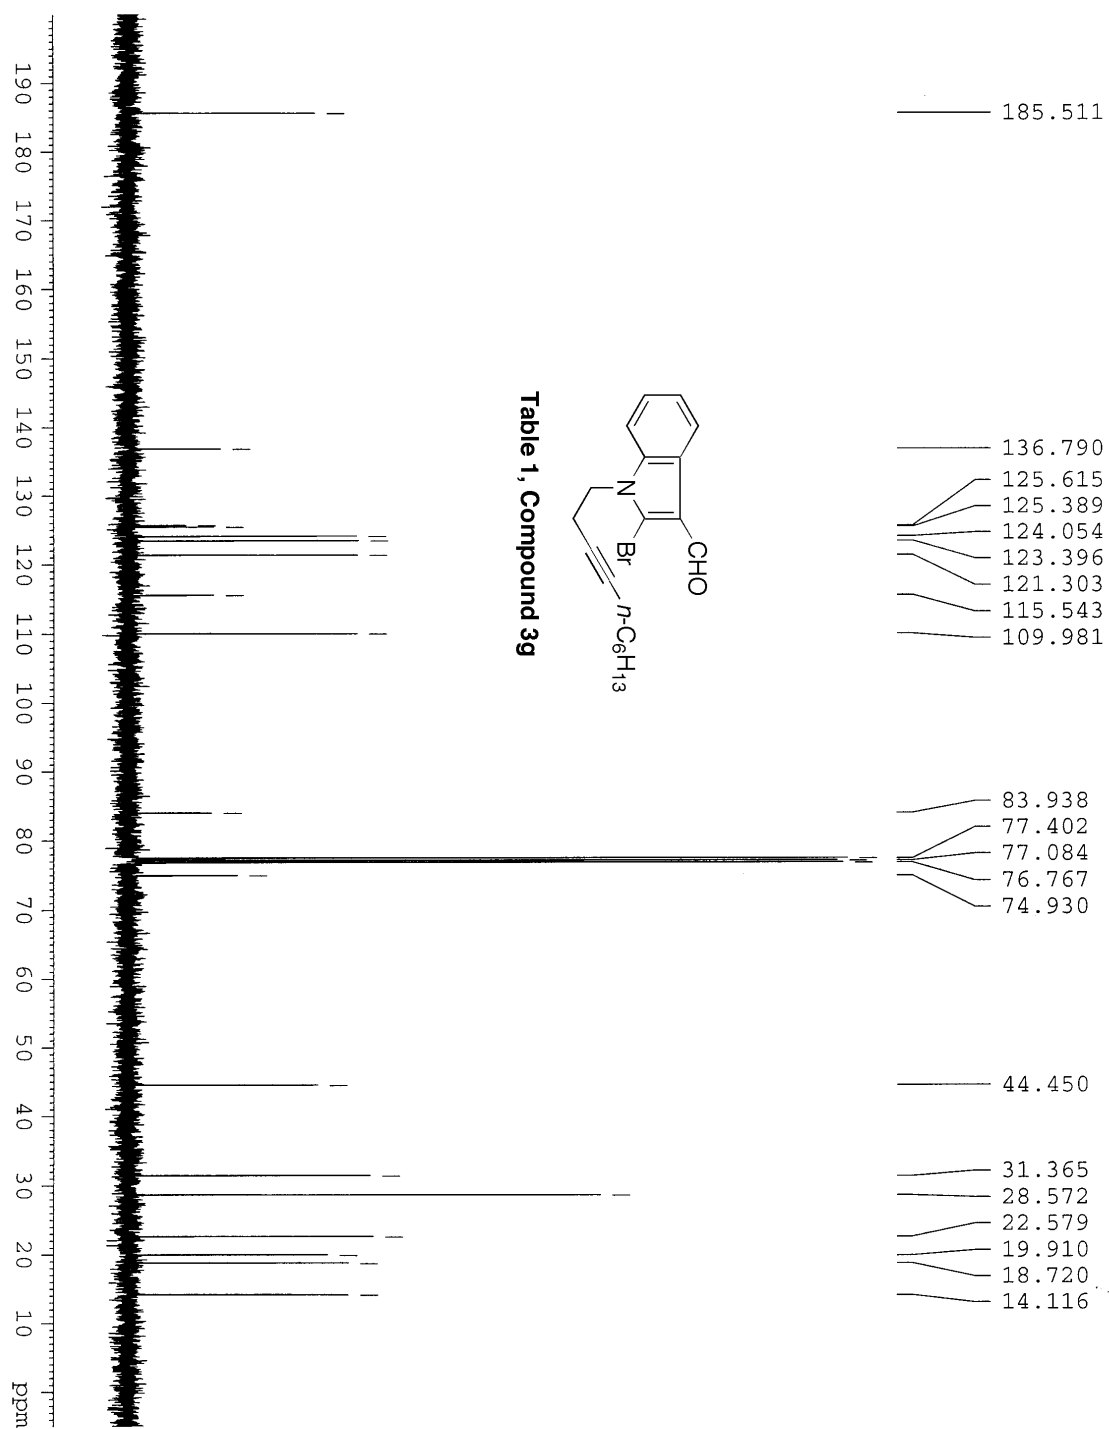

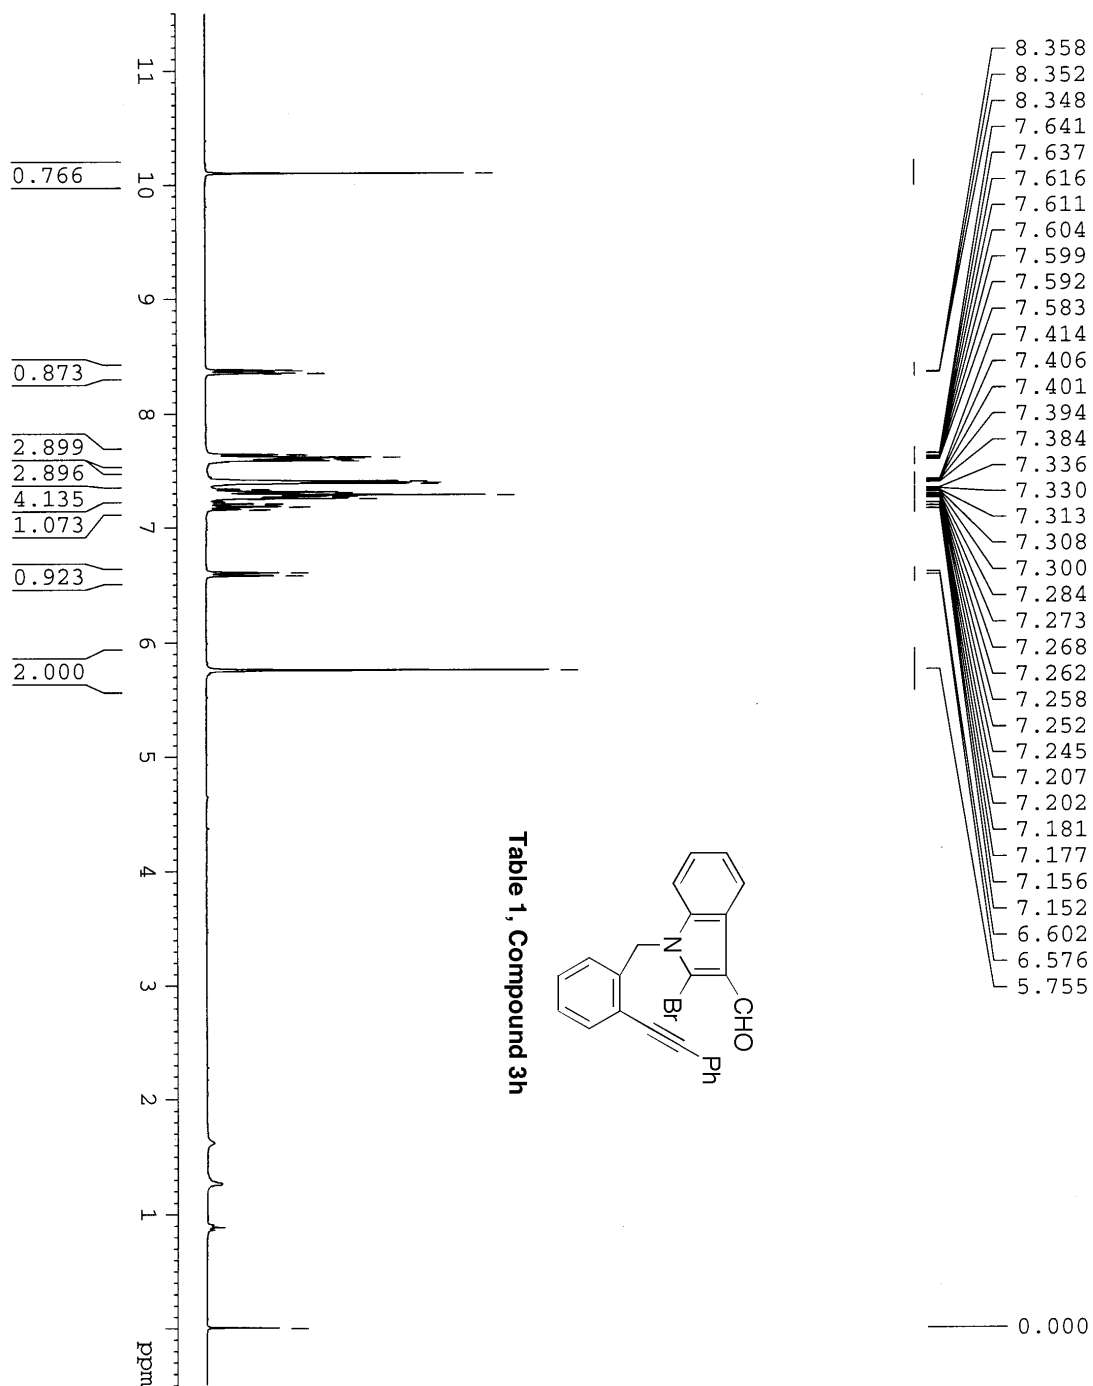

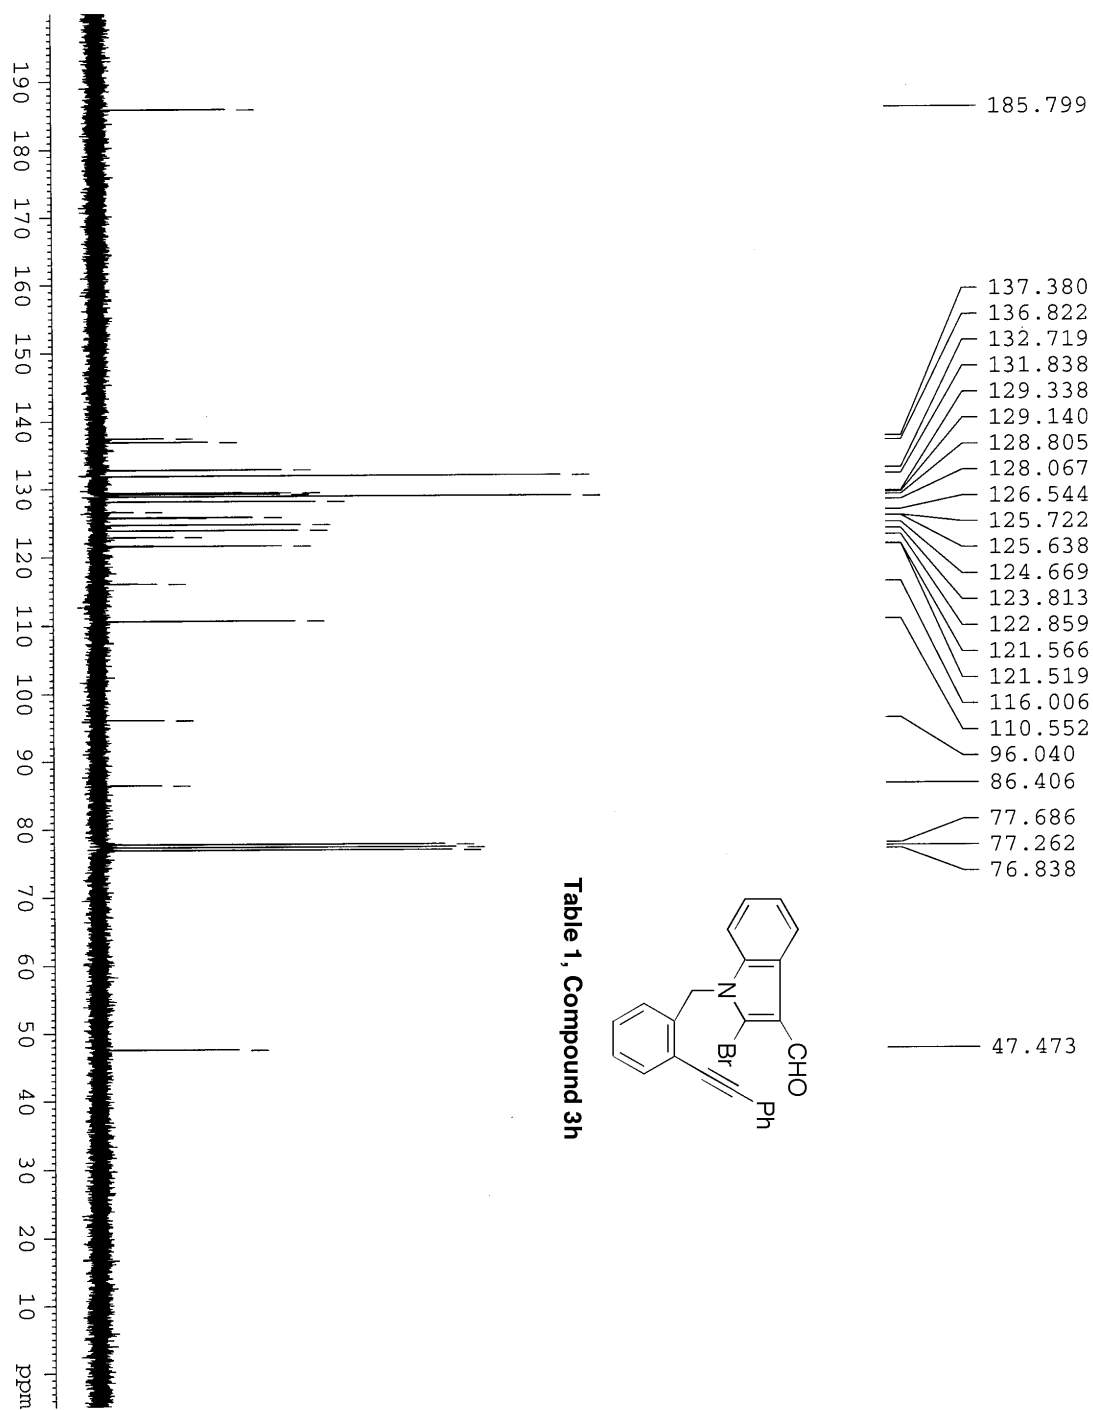

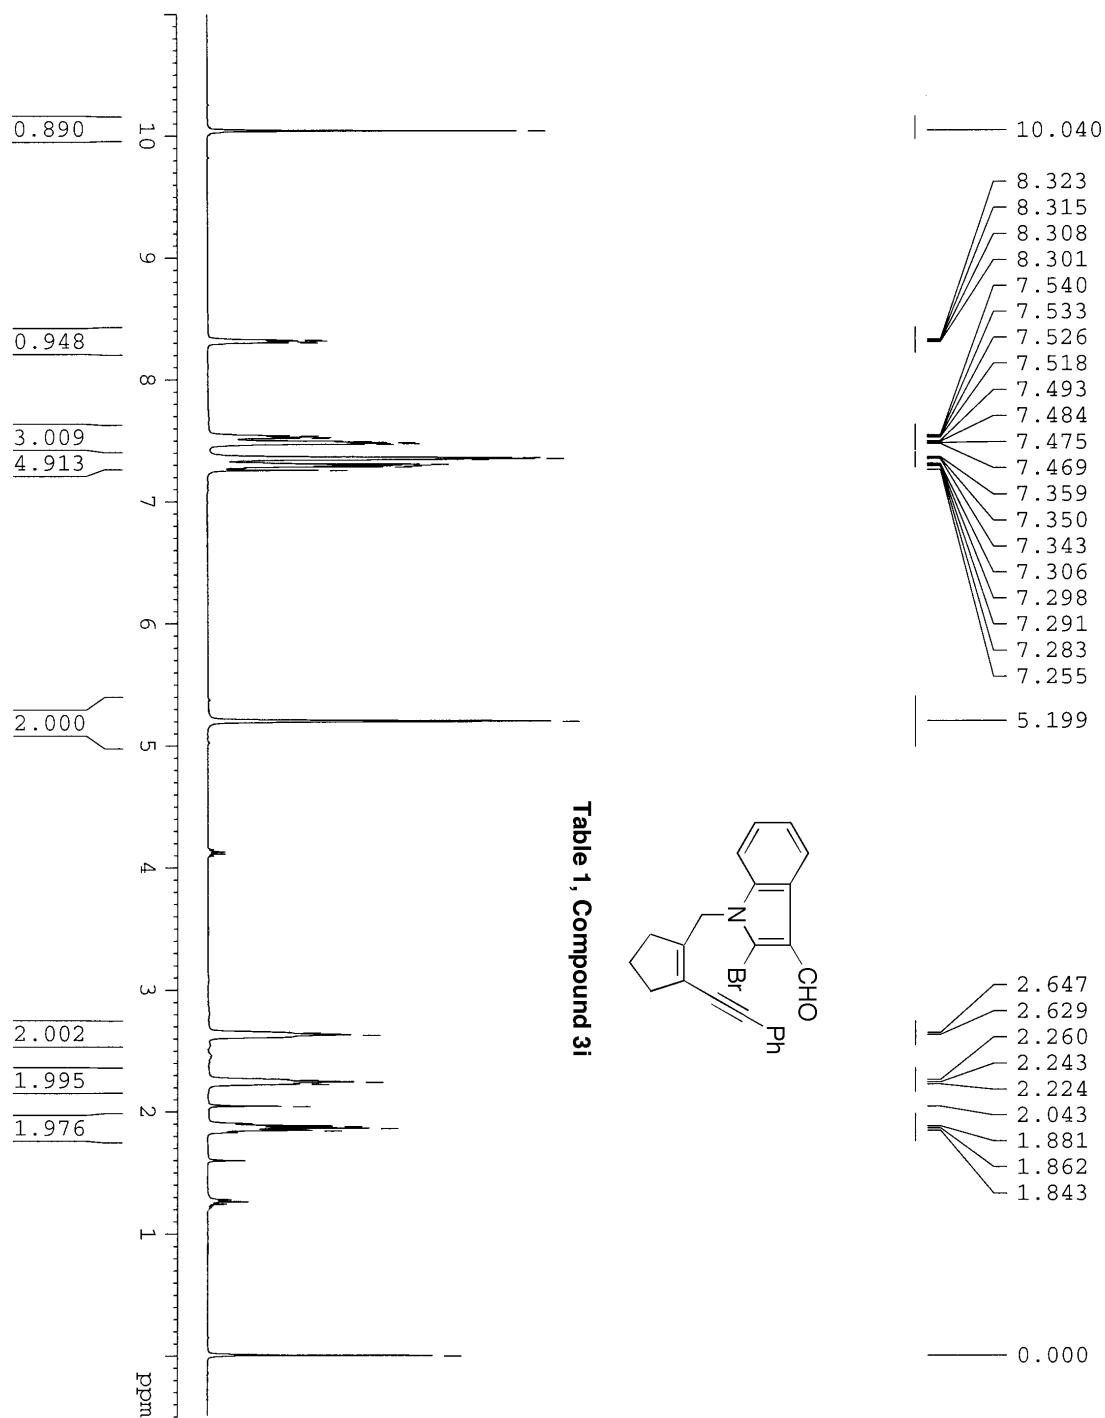

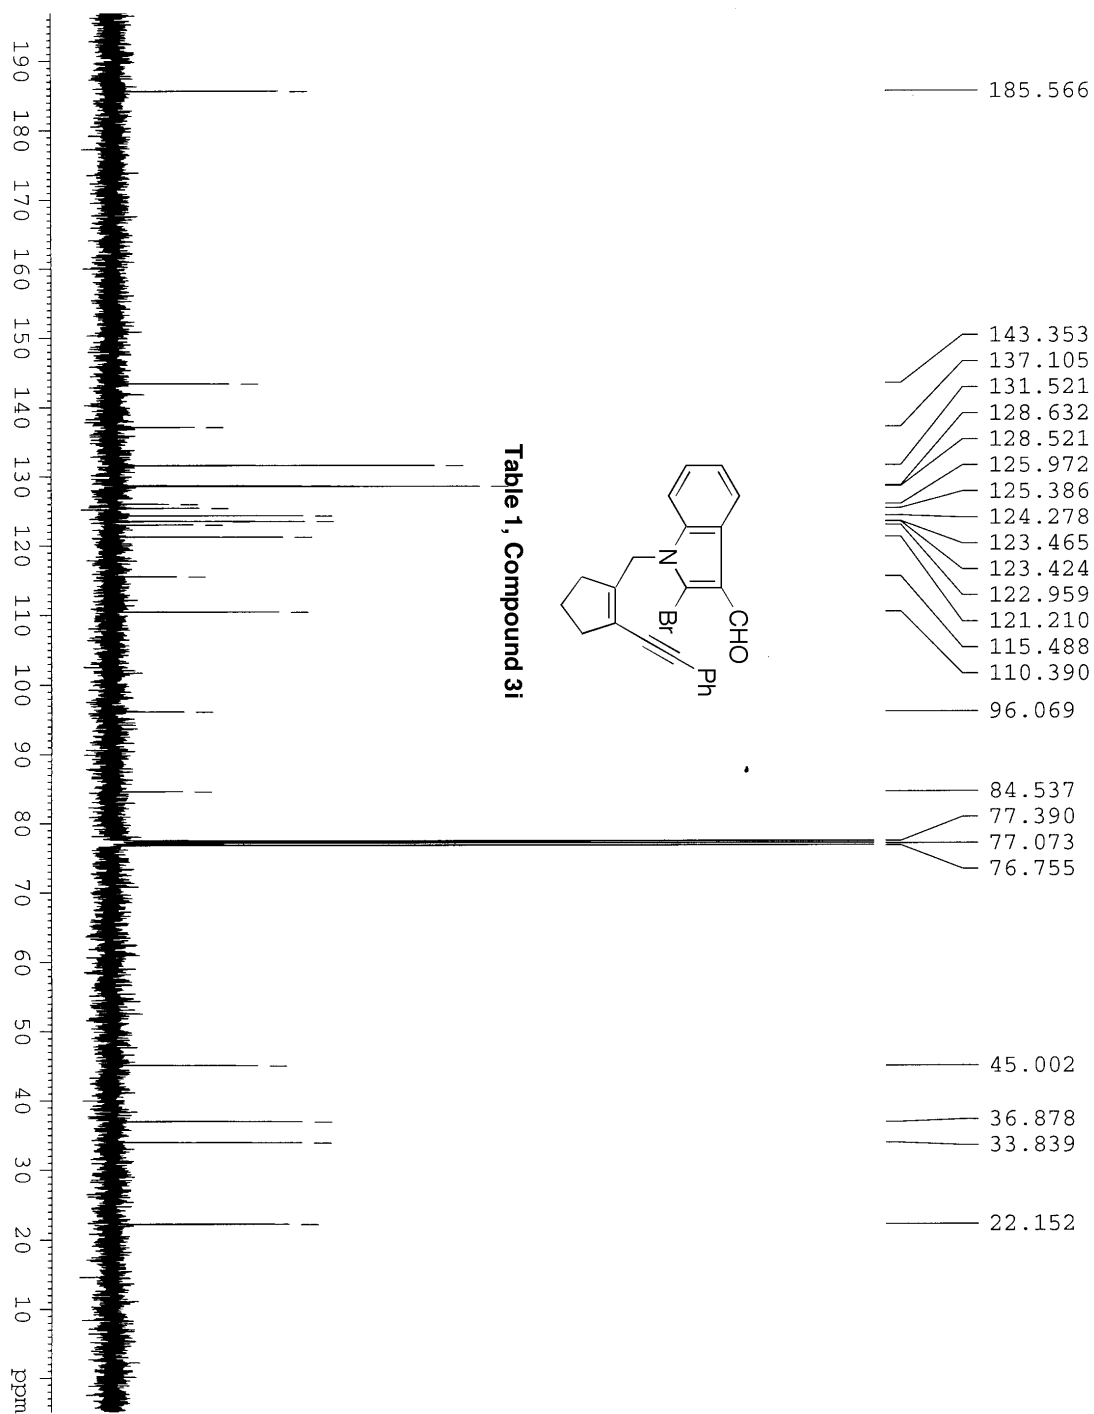

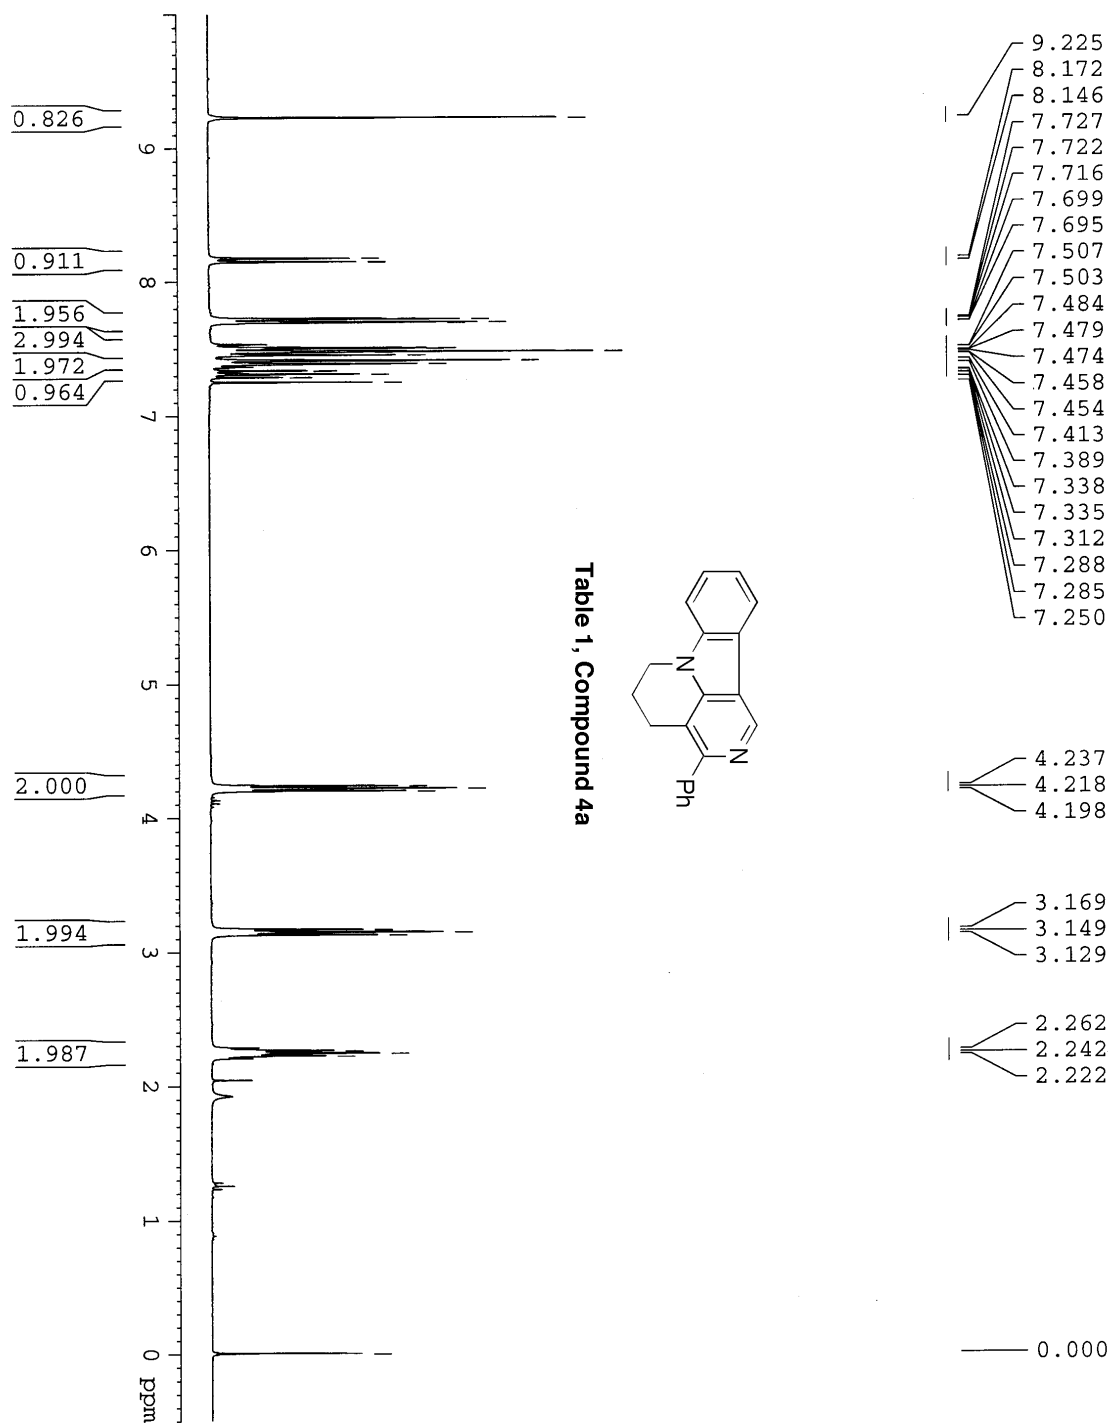

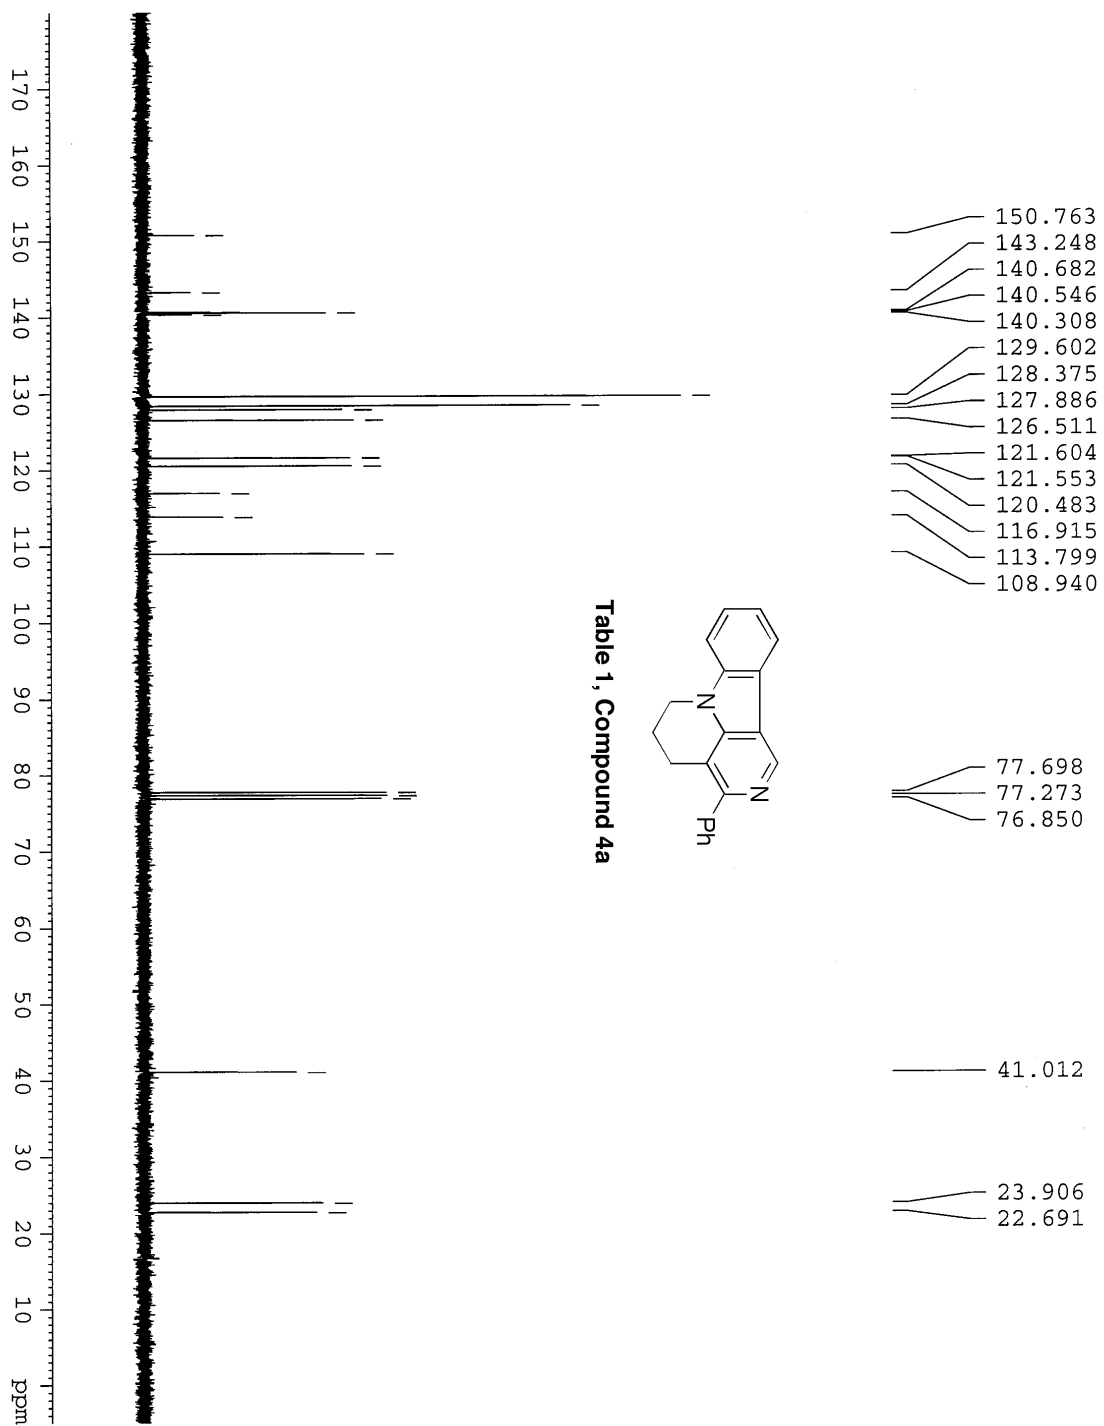

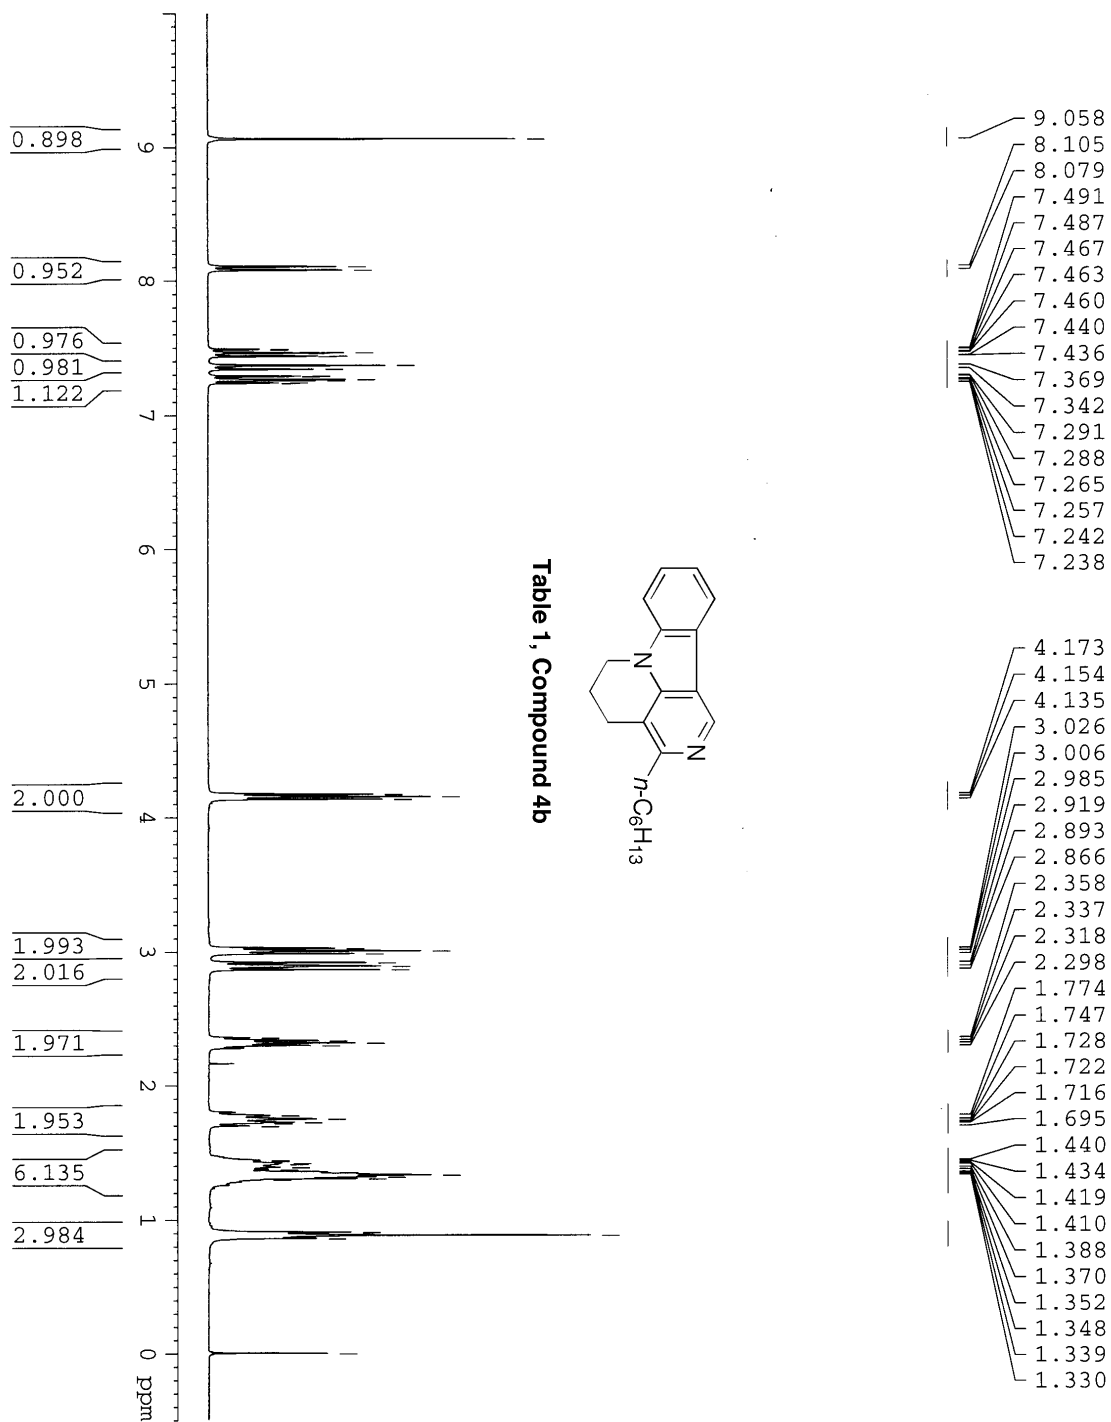



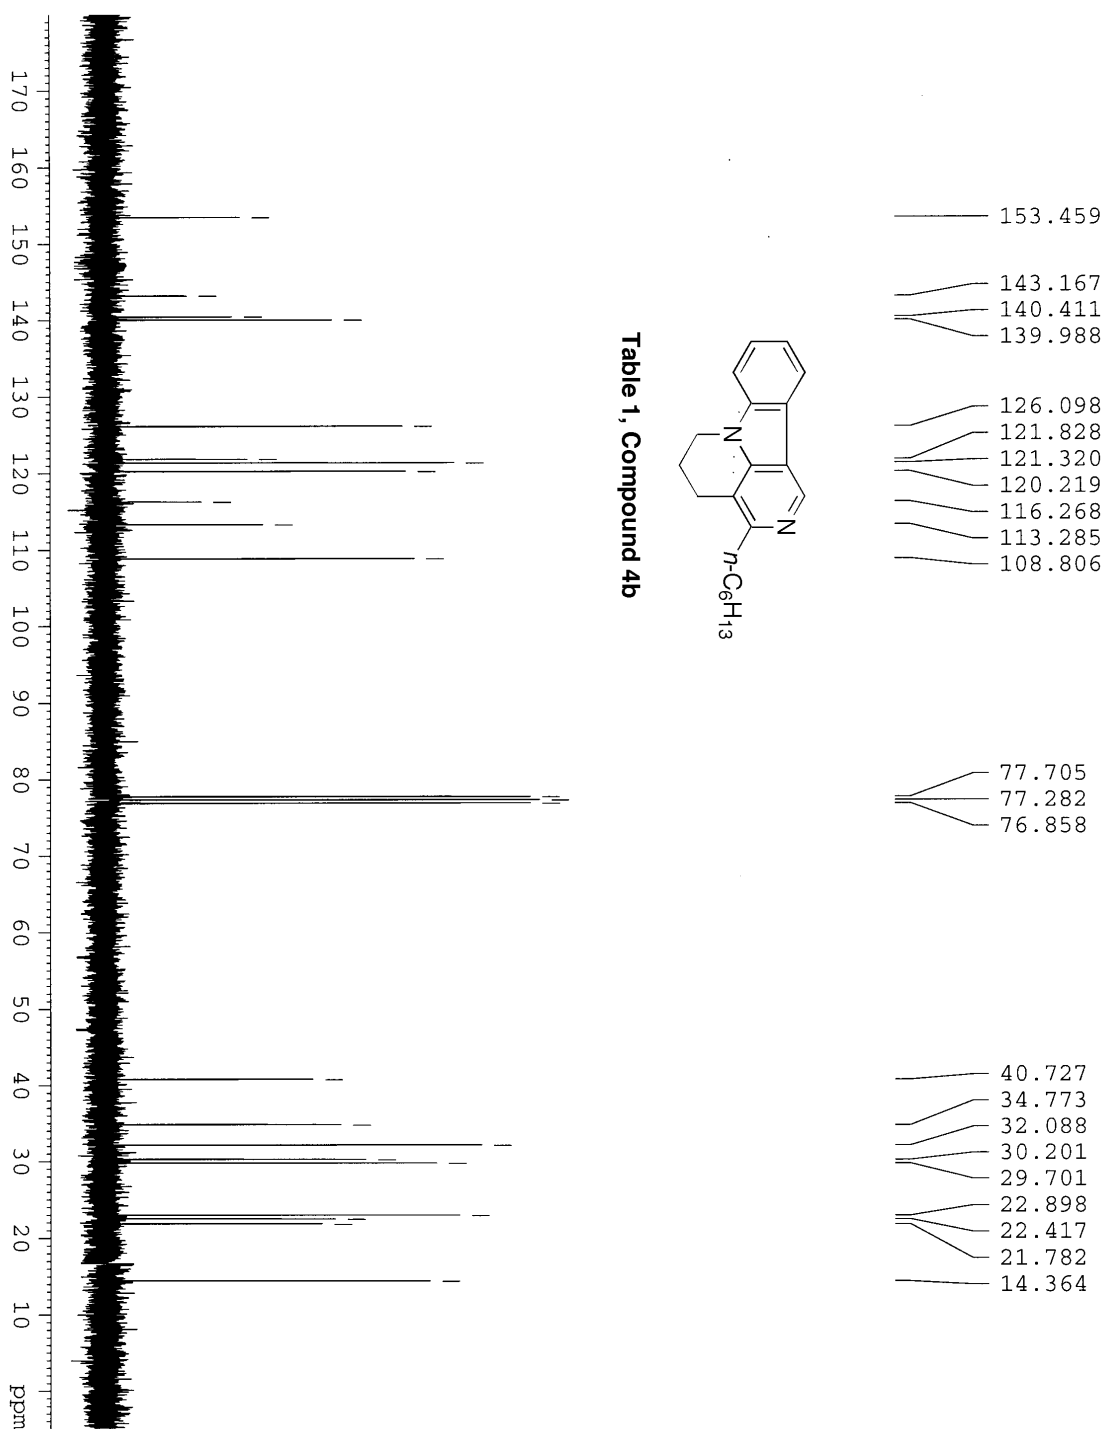

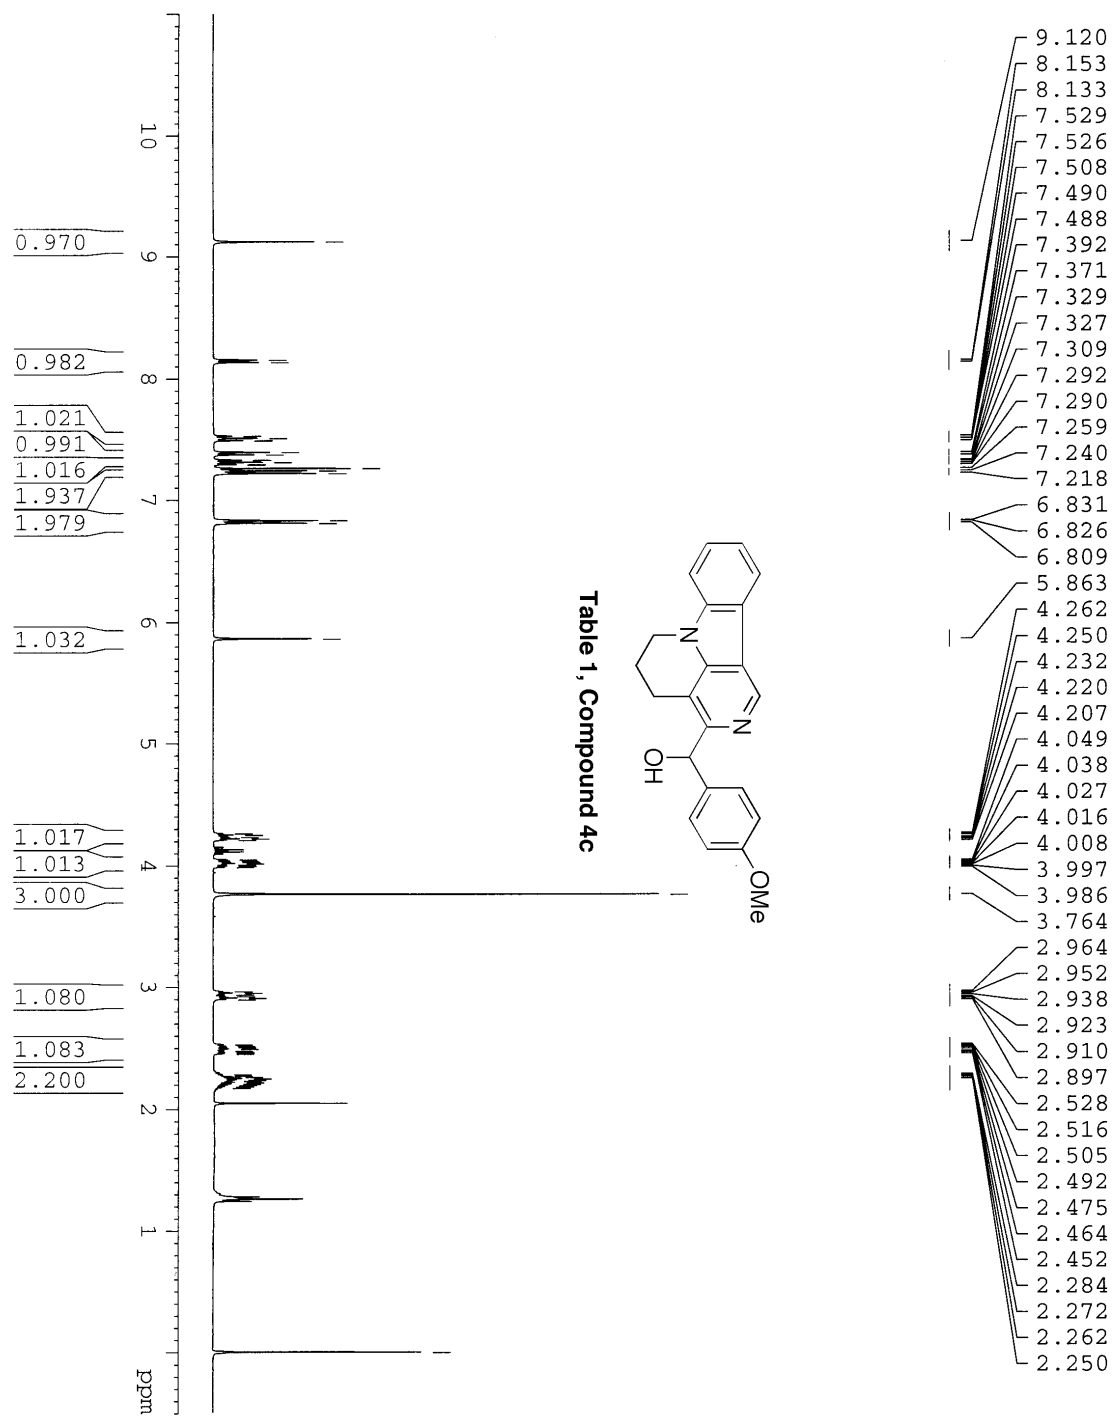

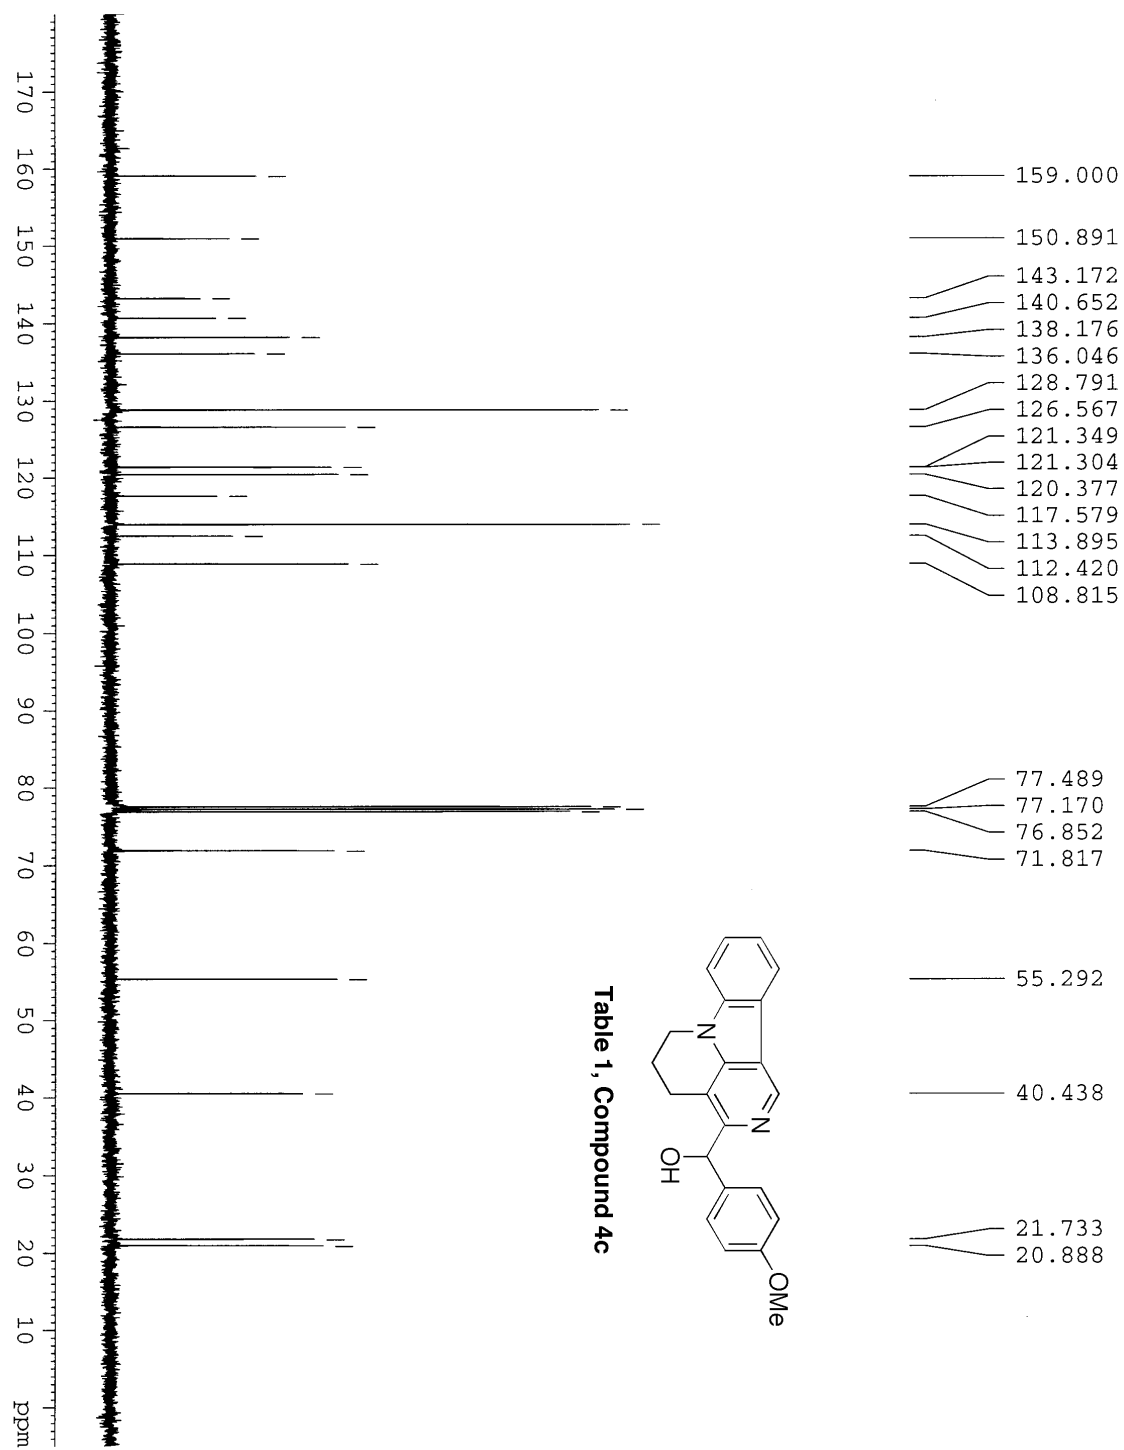

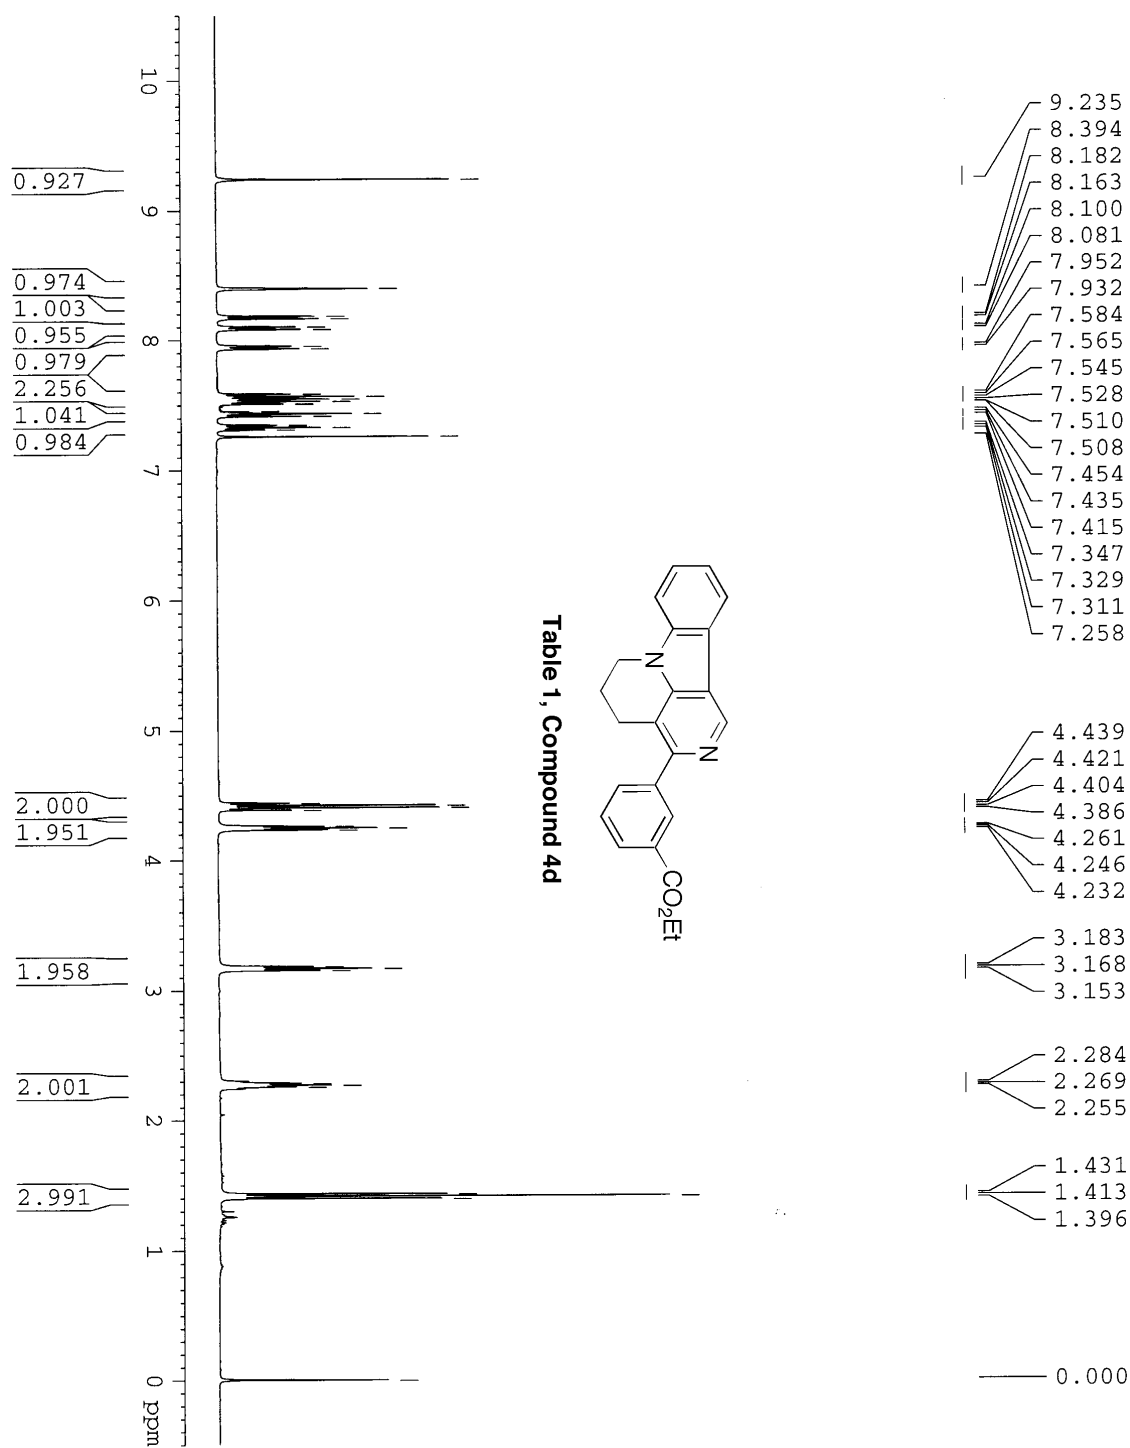

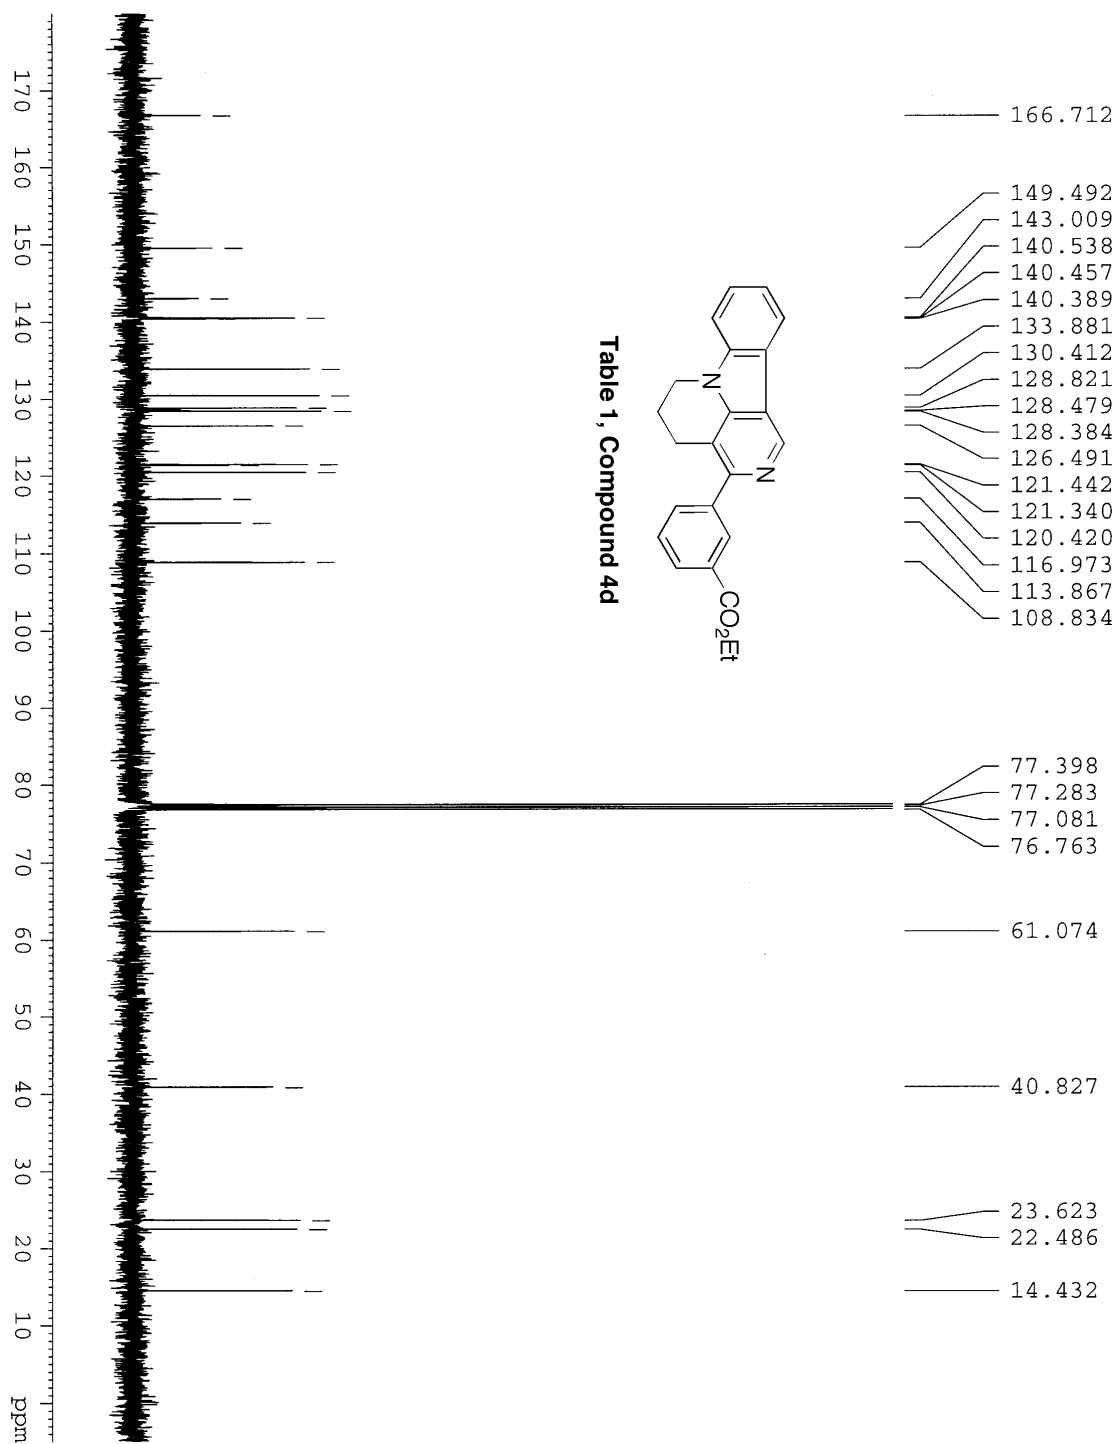

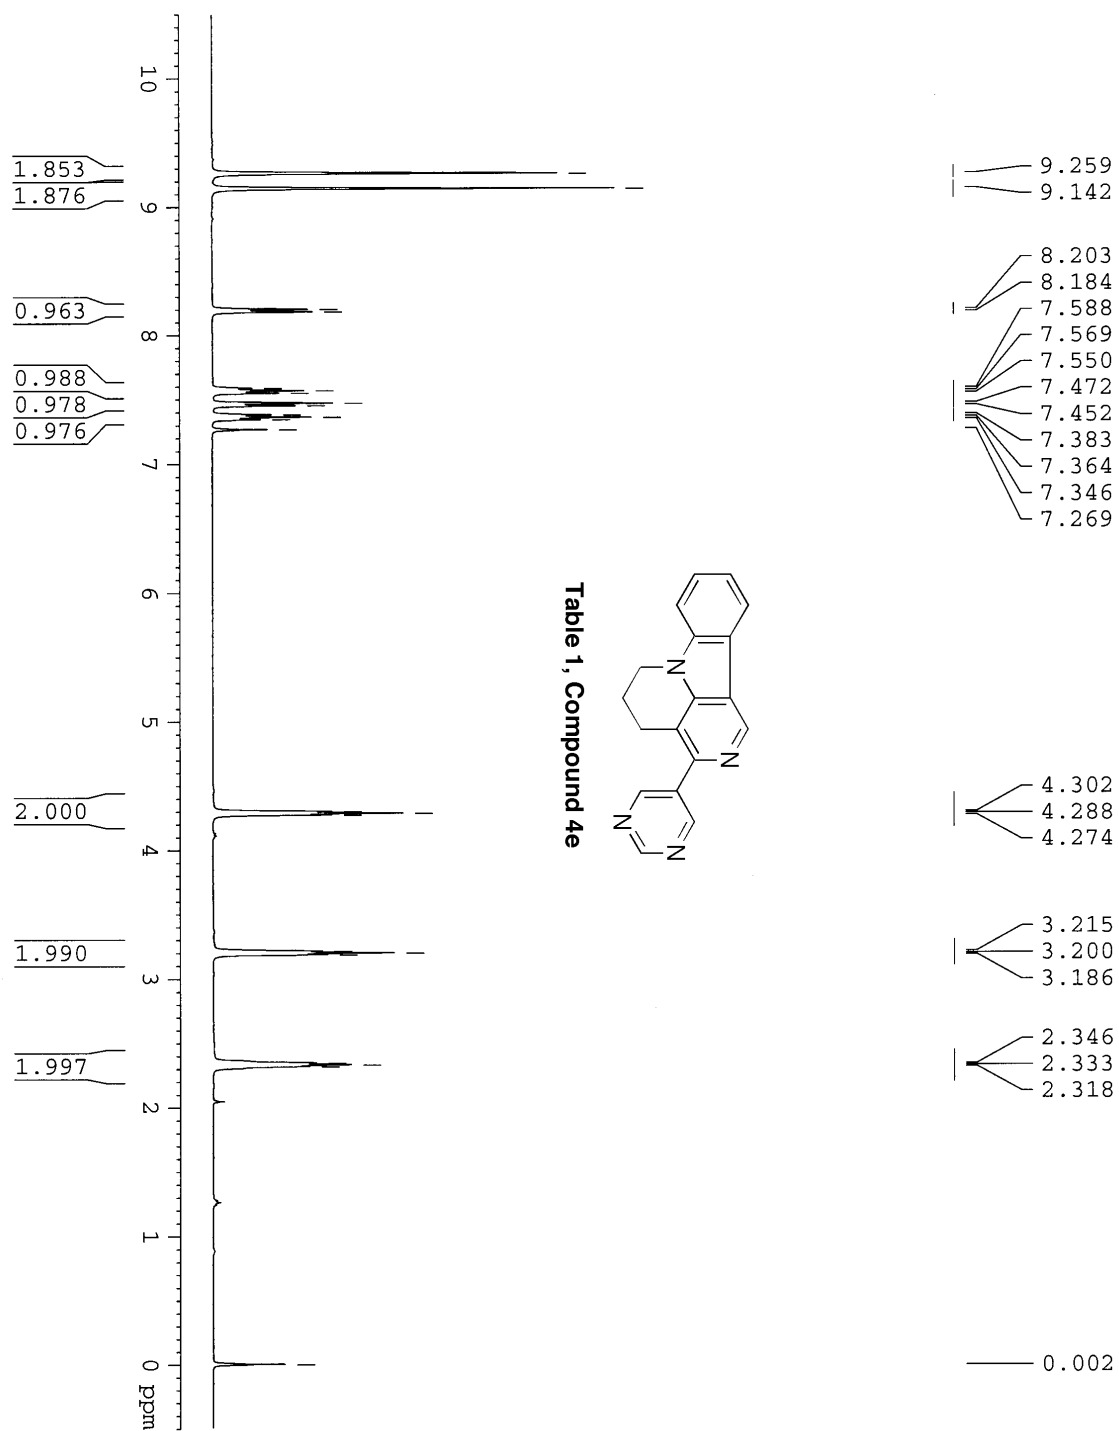

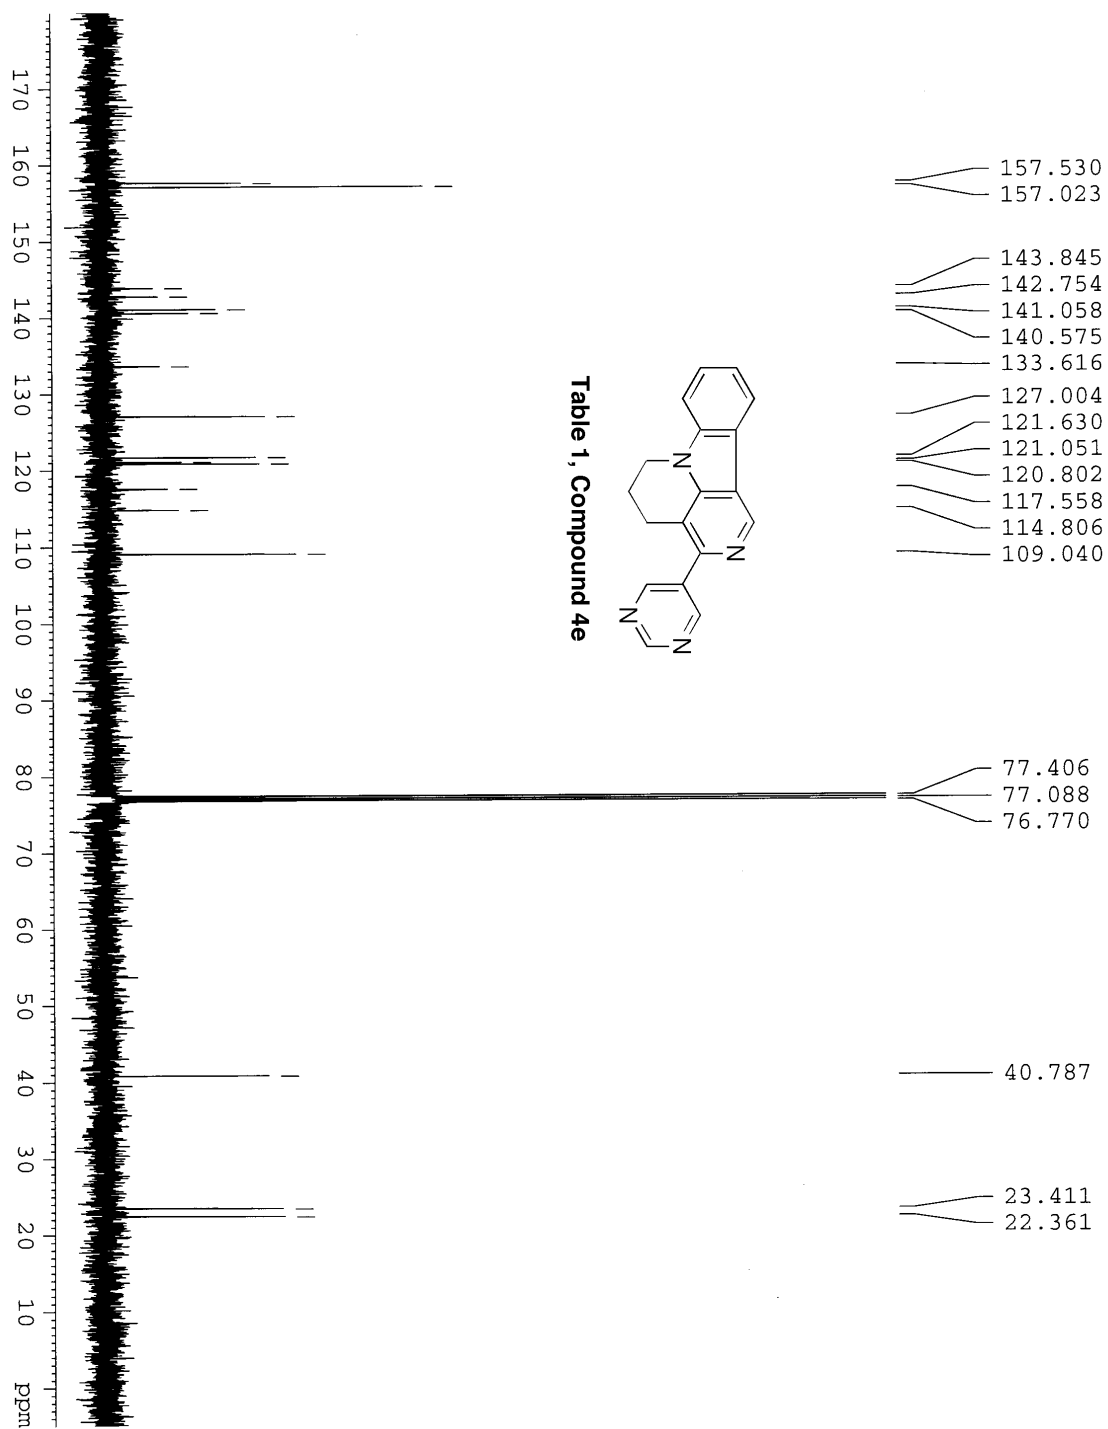

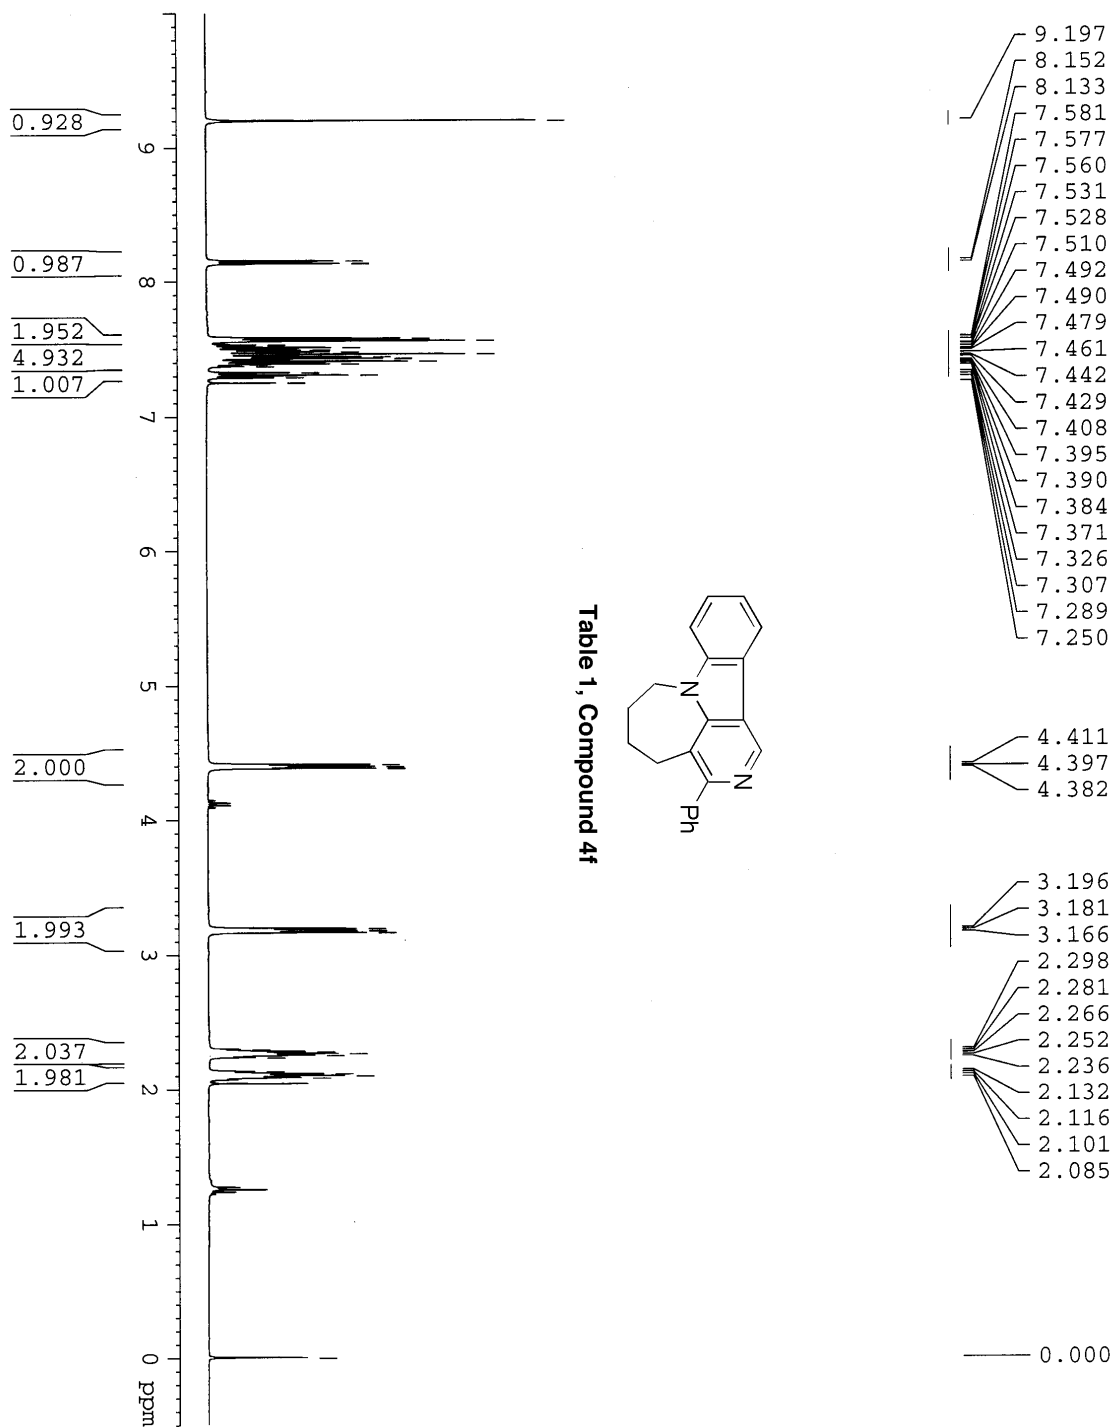



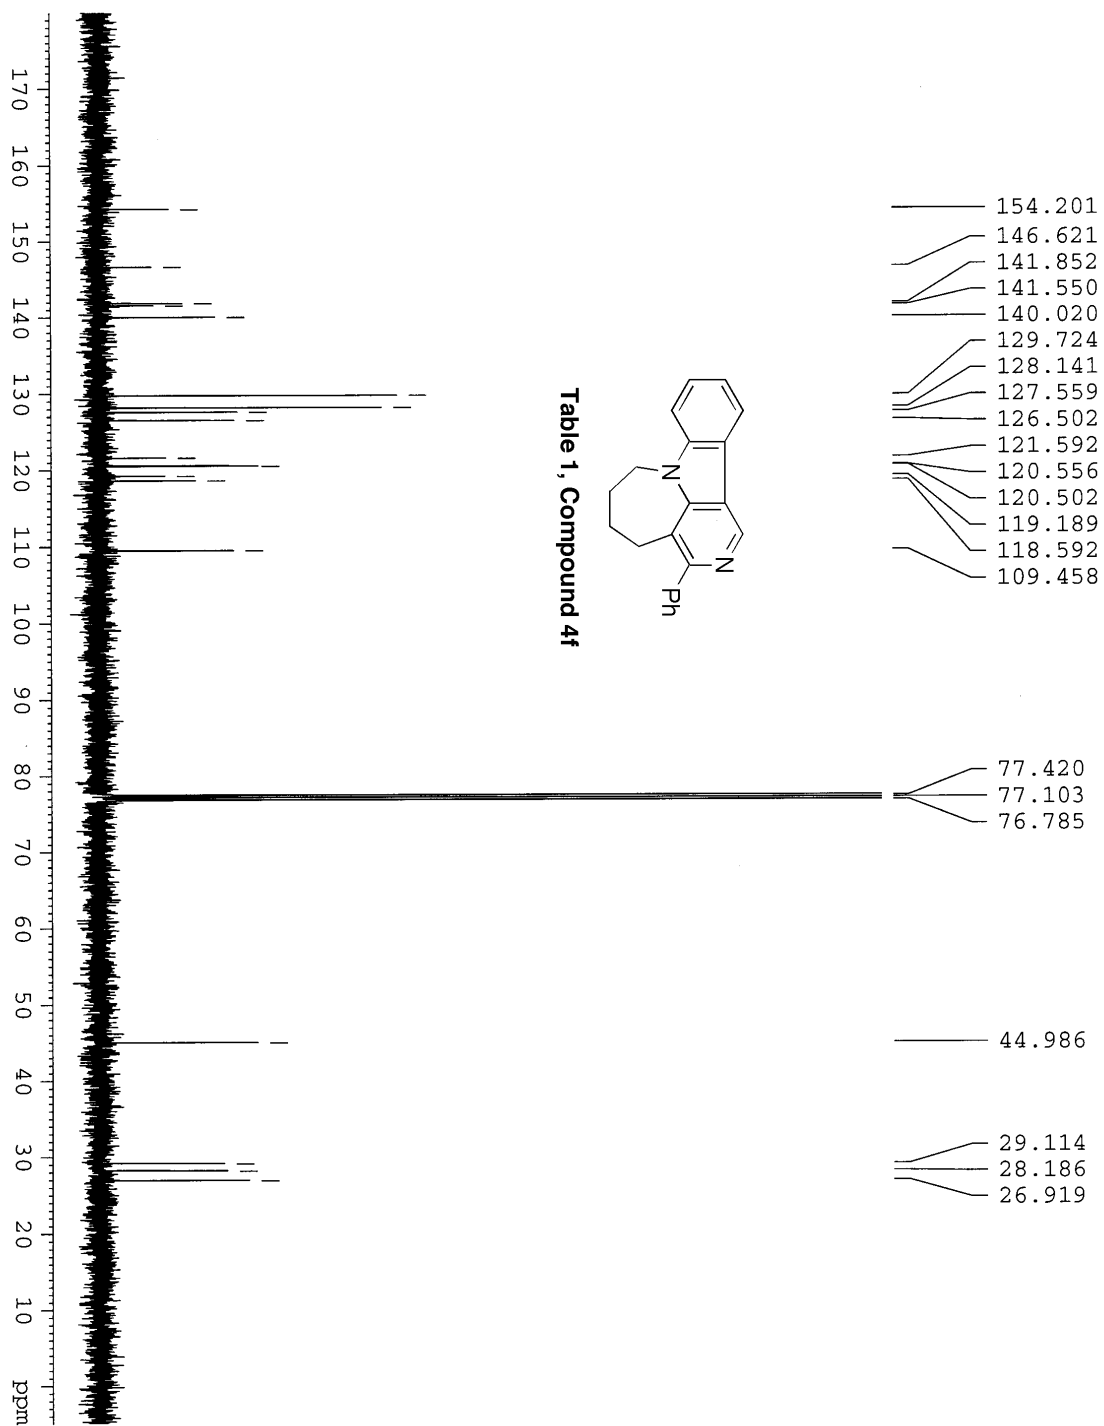

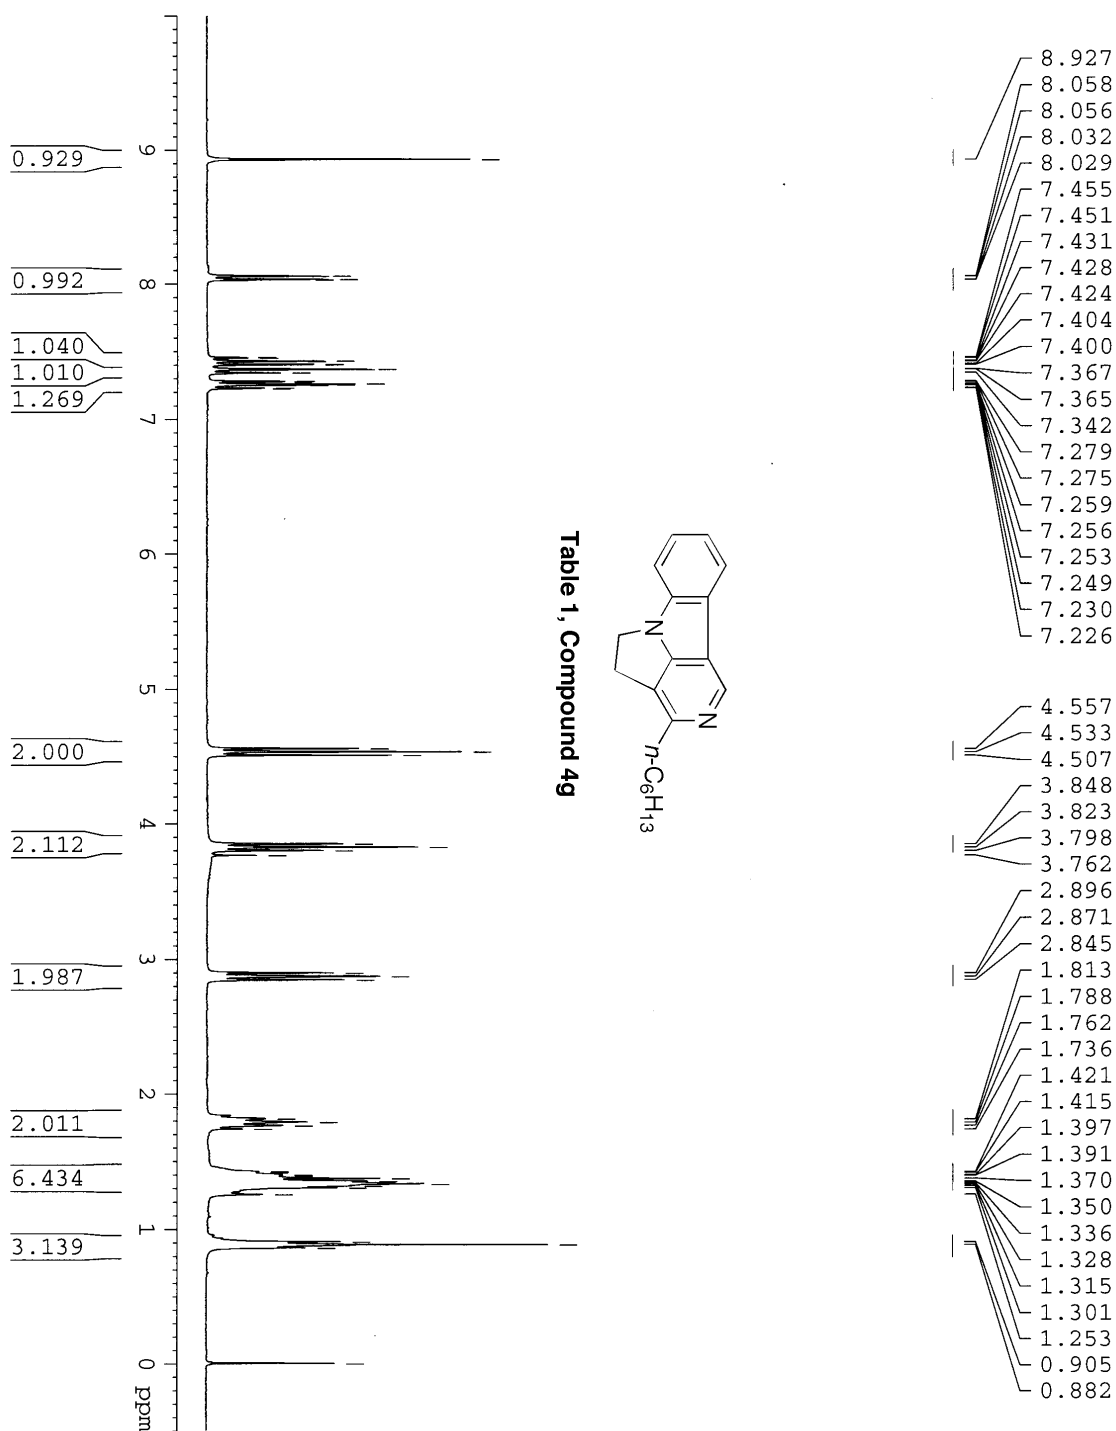

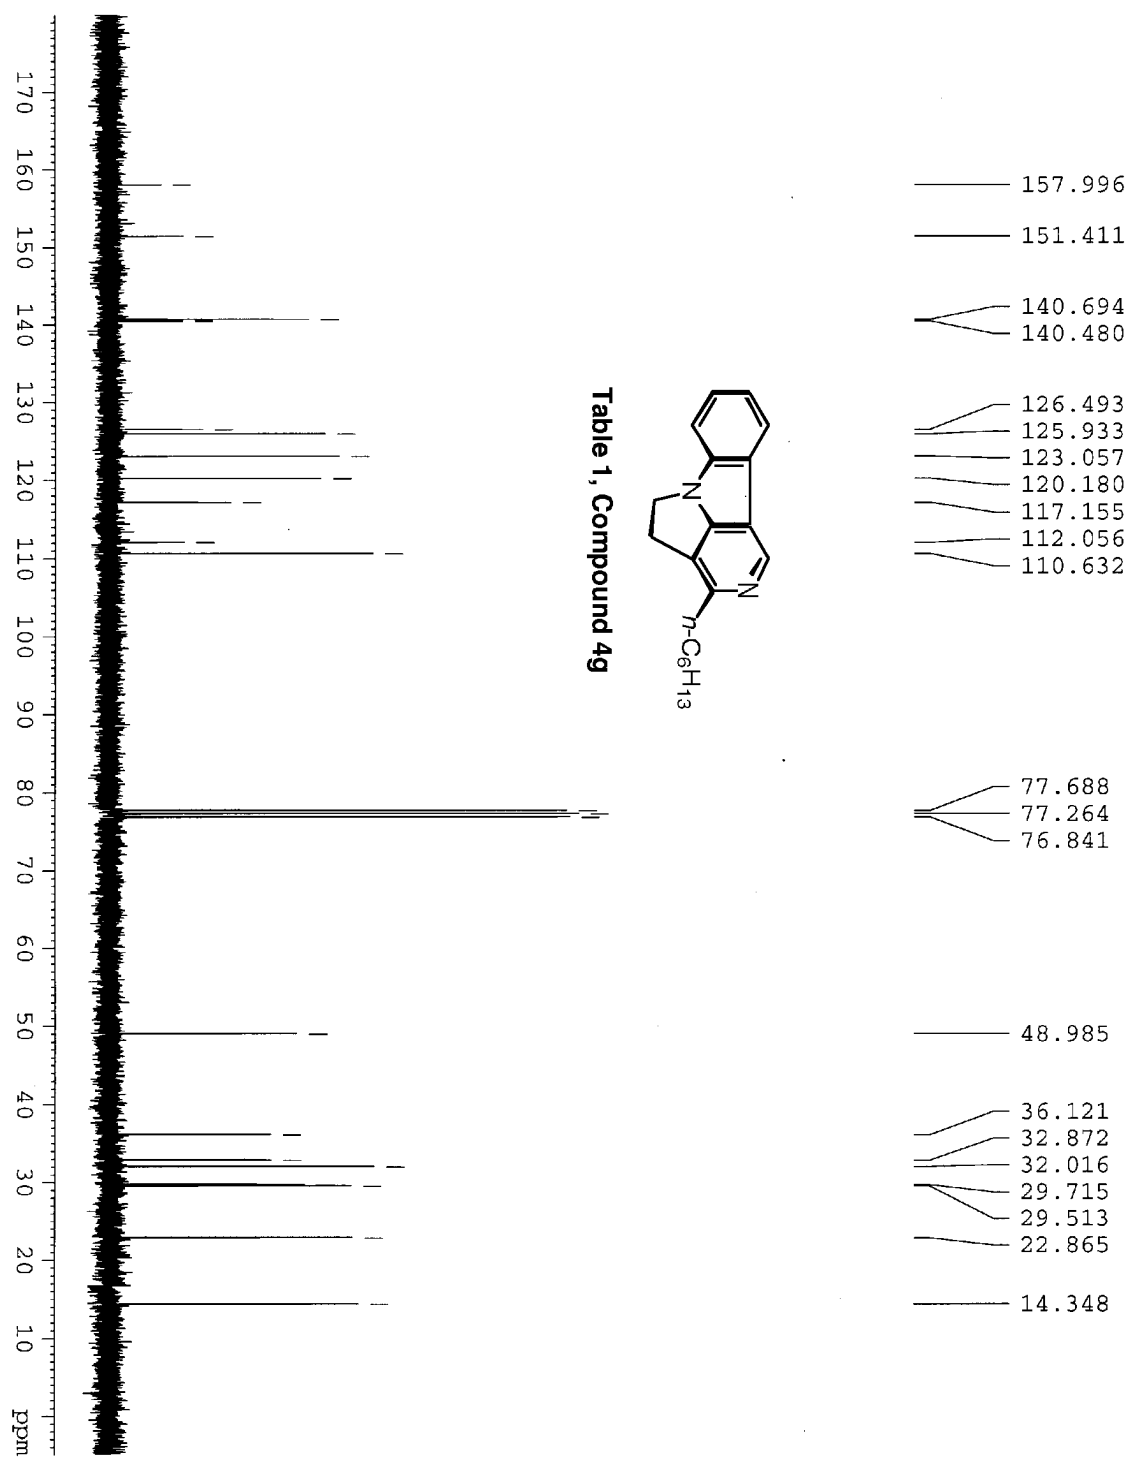

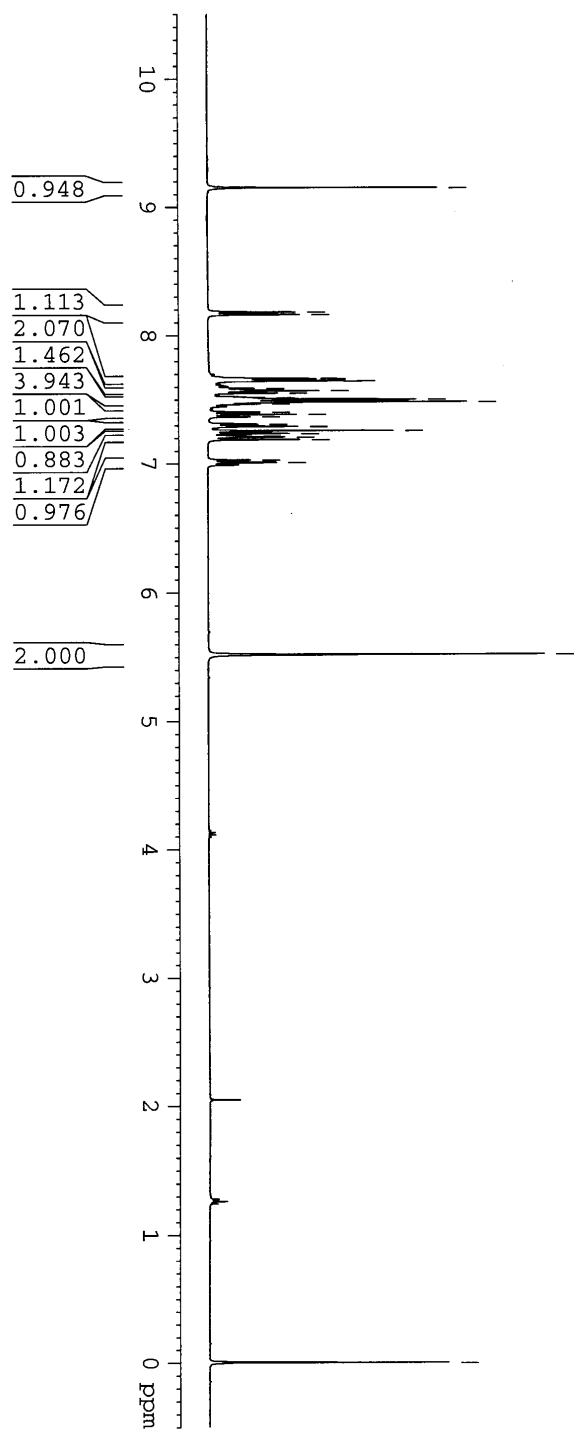

Table 1, Compound 4h

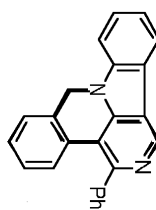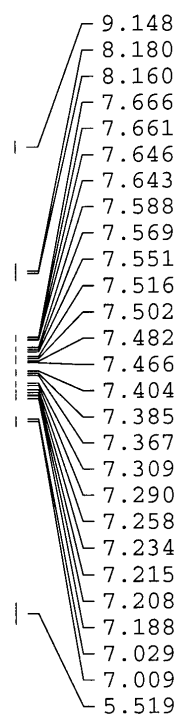

0.000

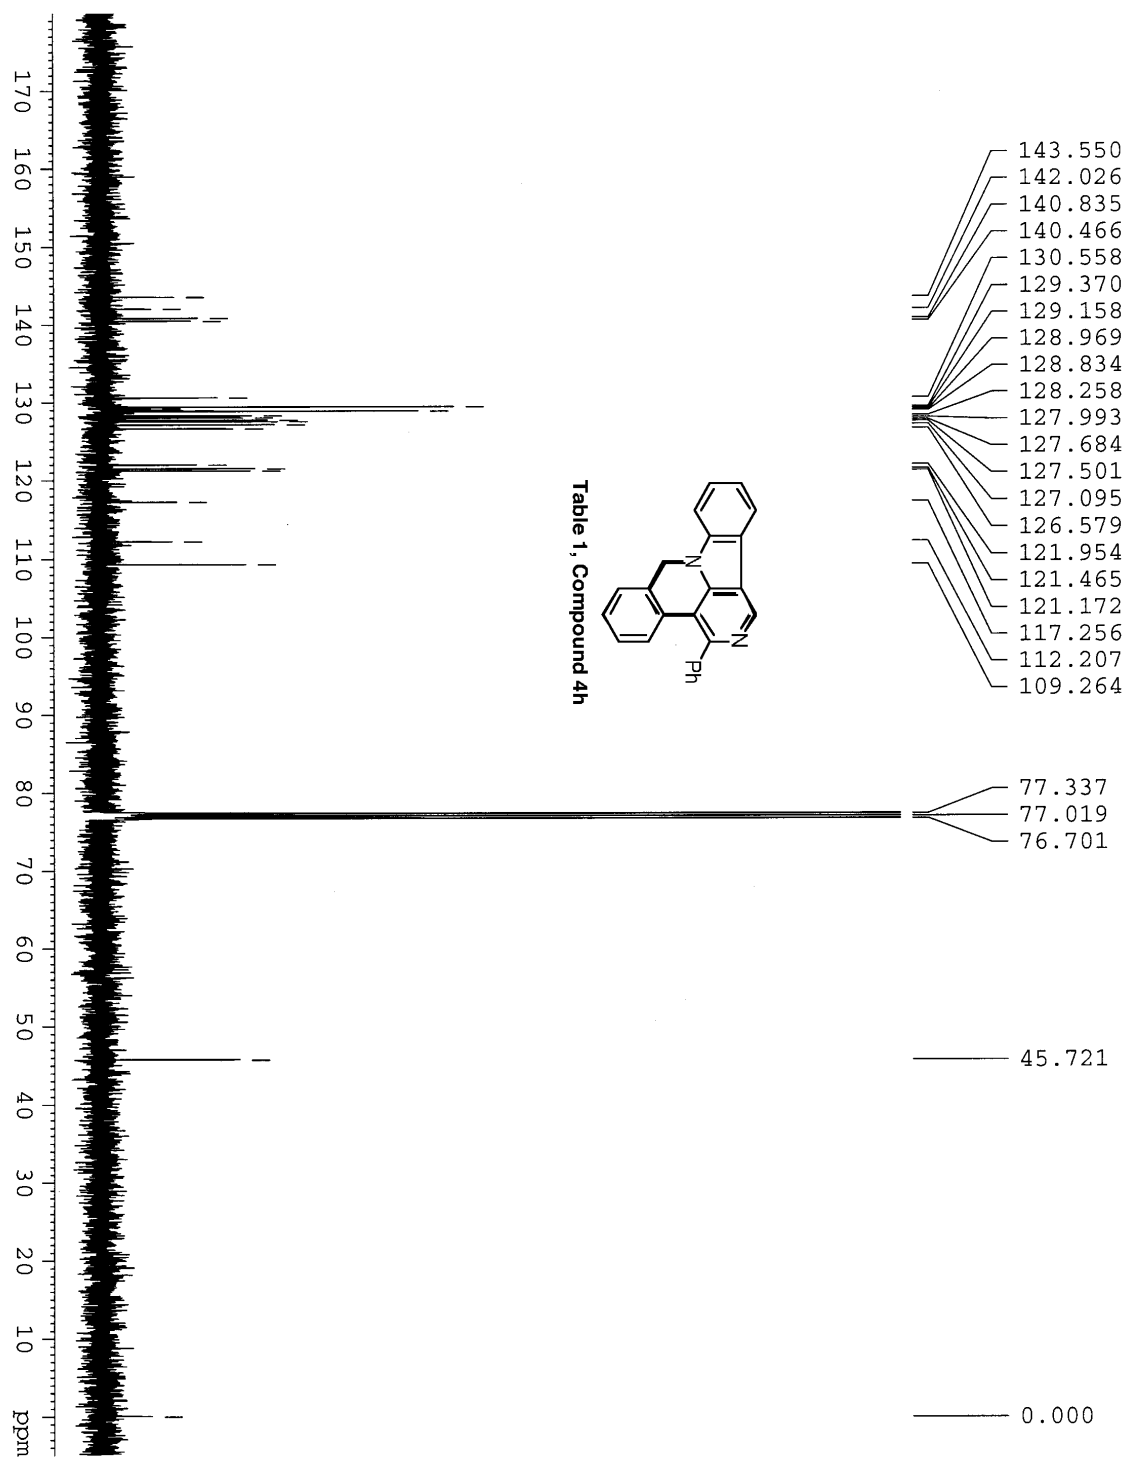

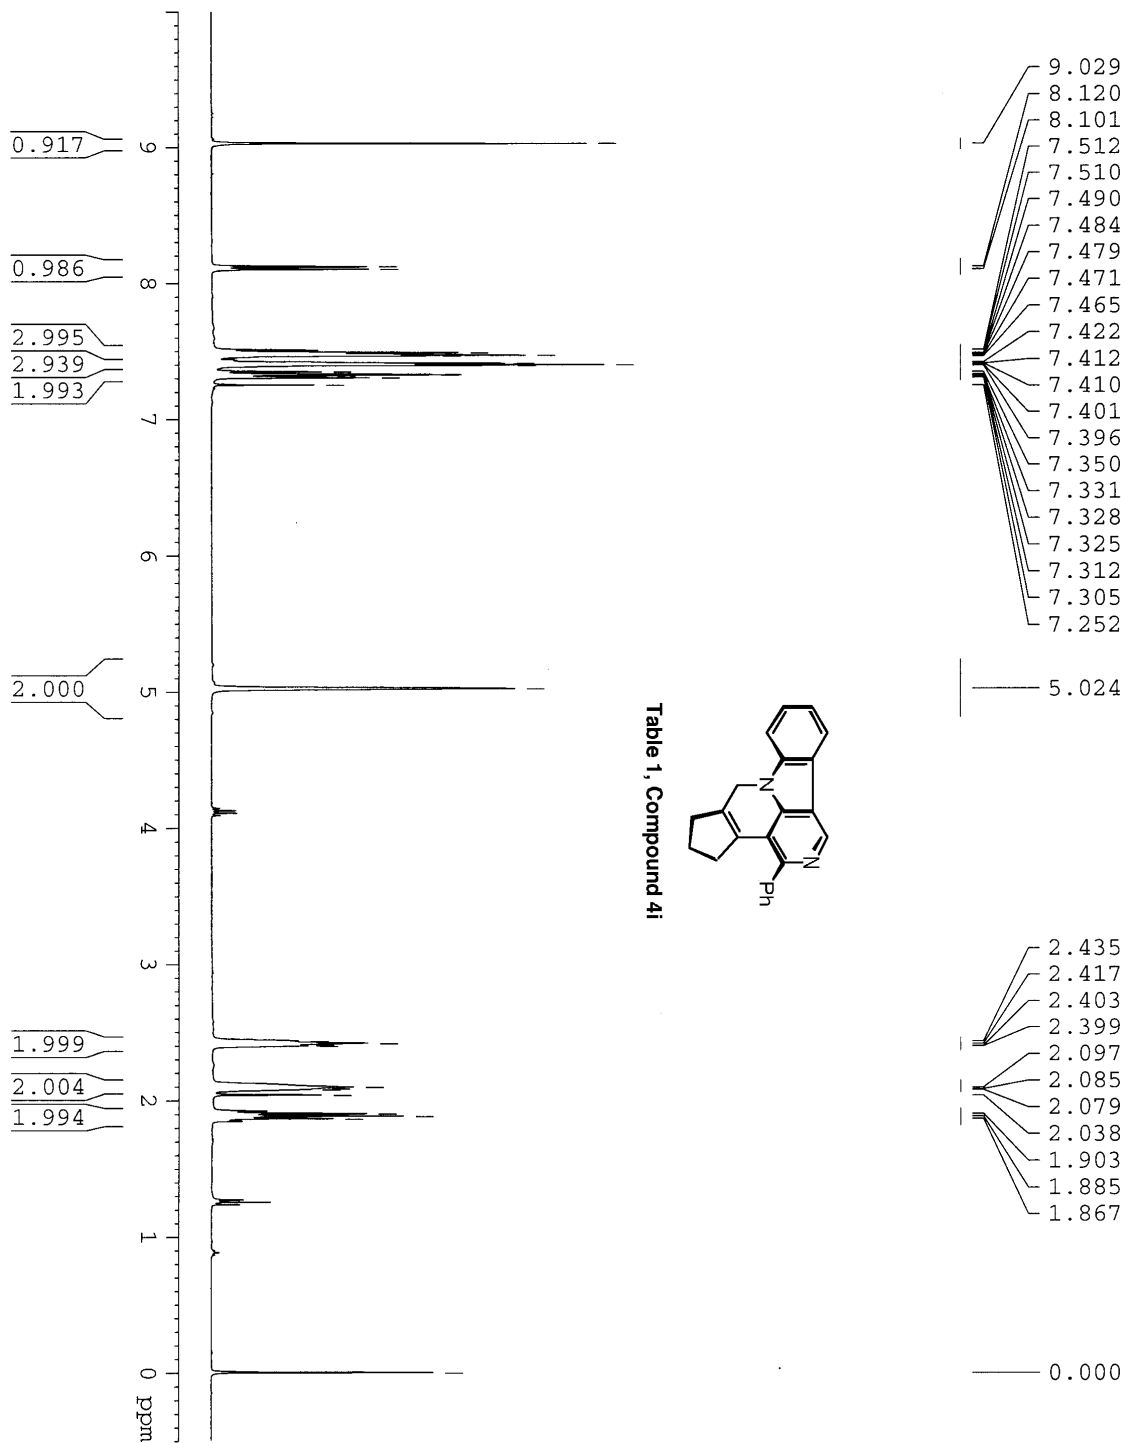

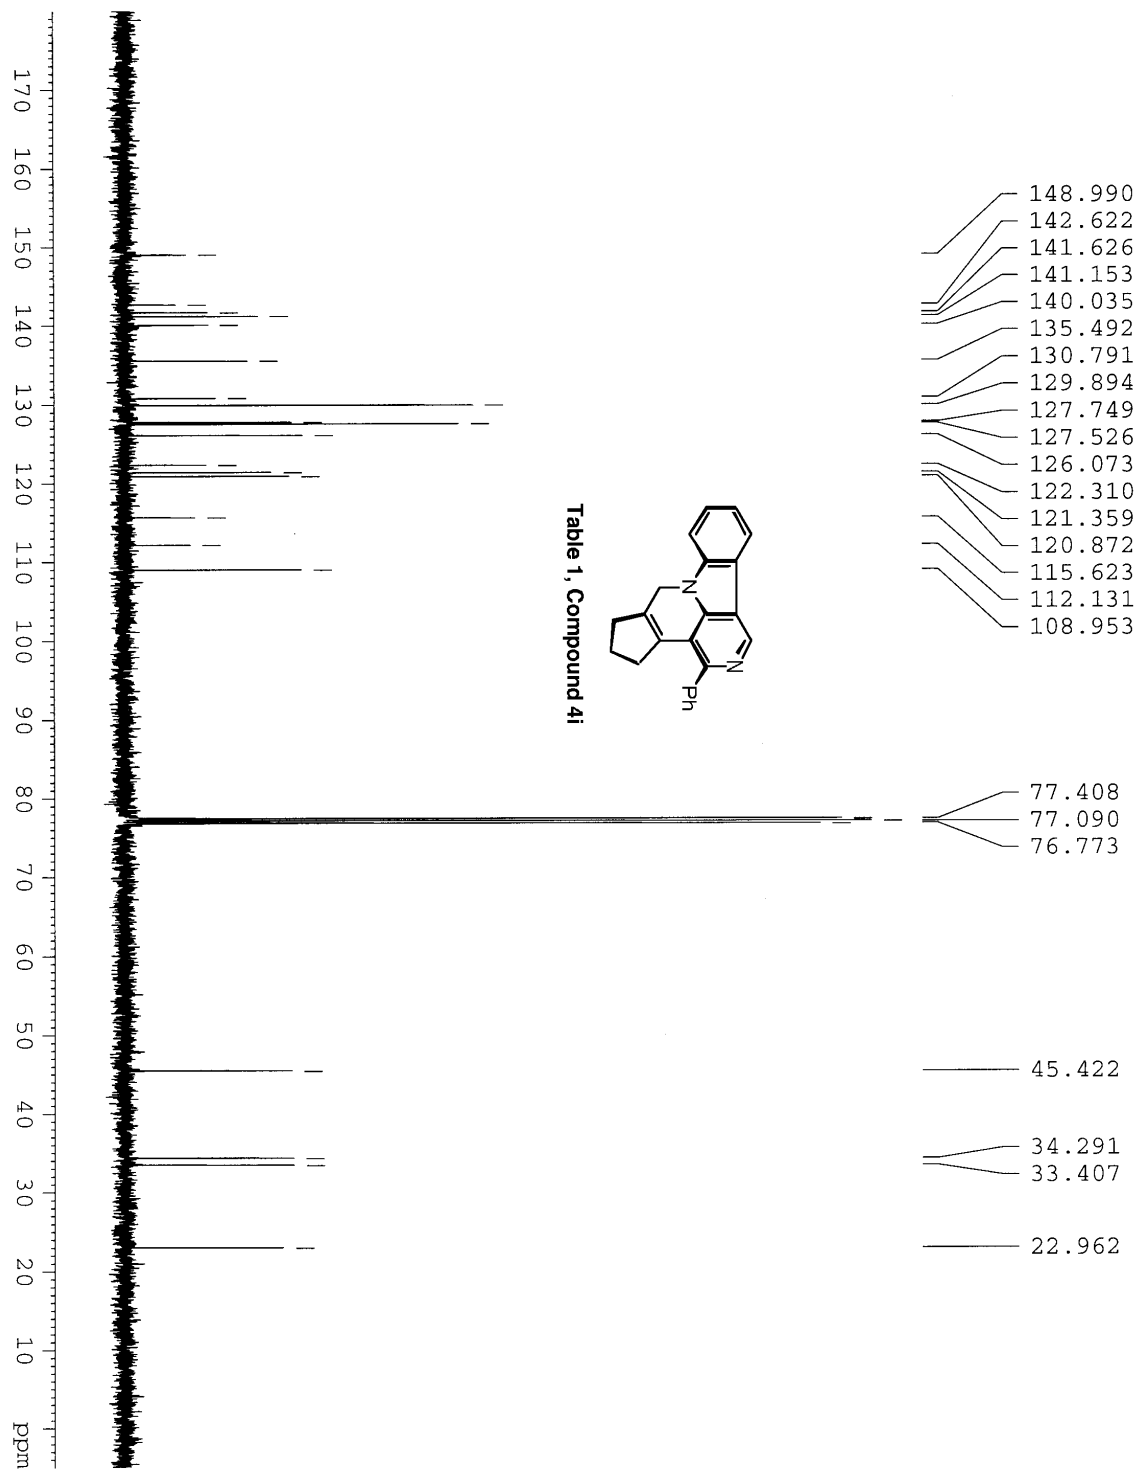

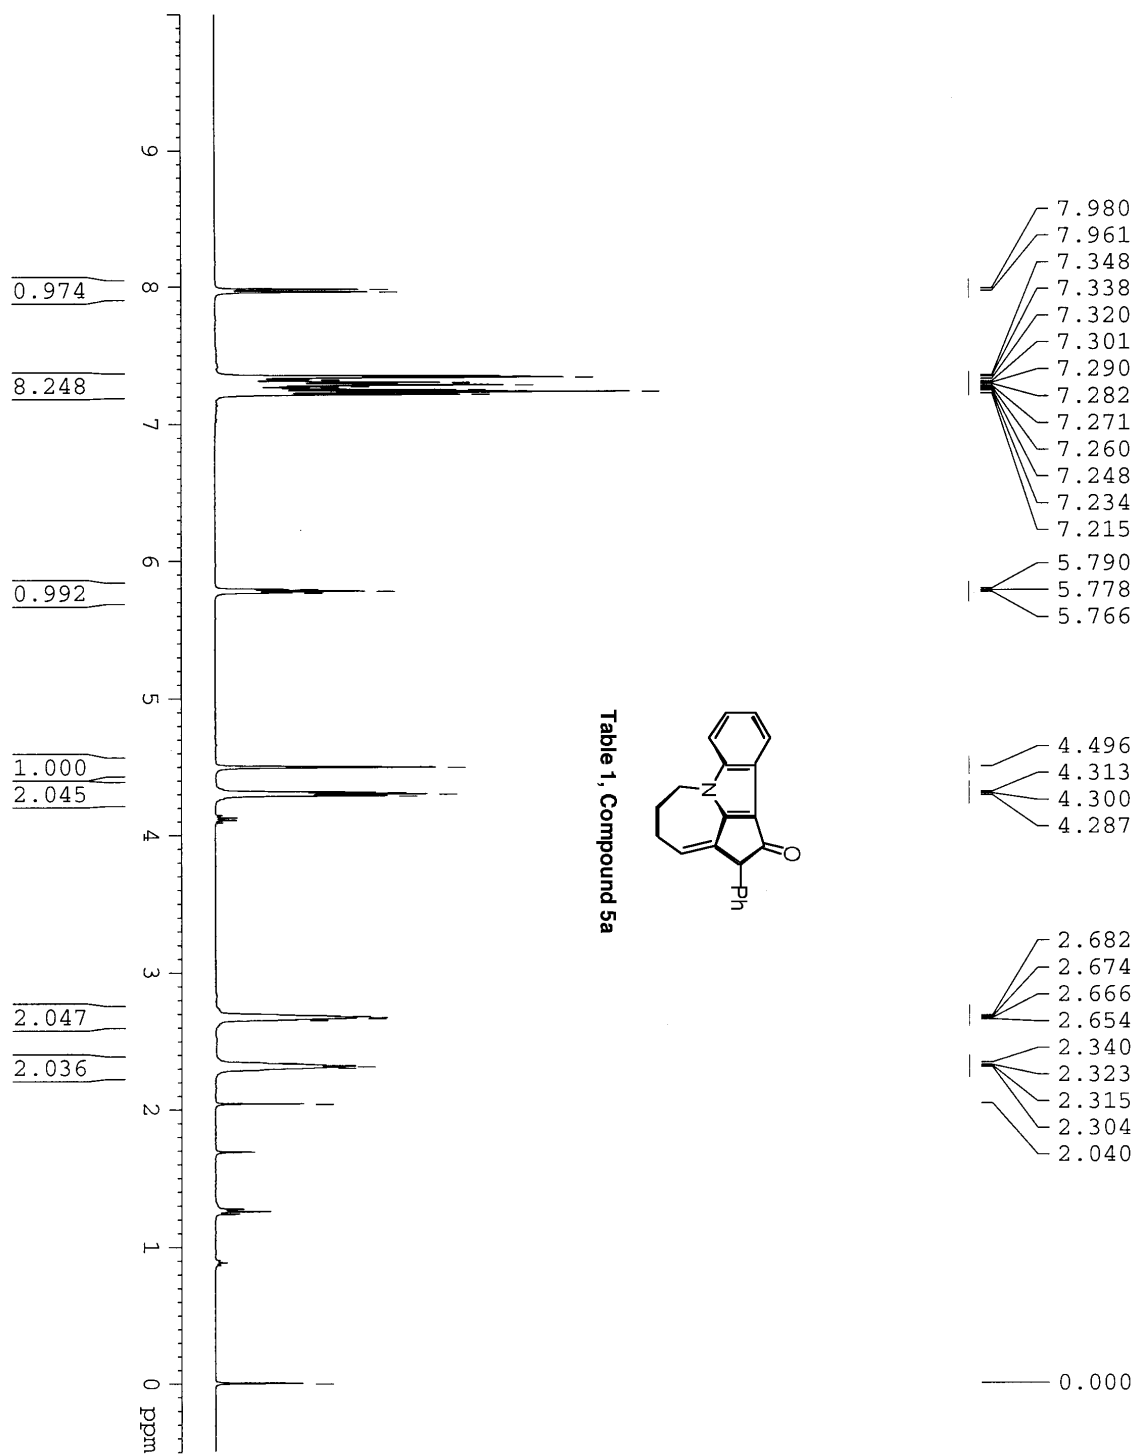



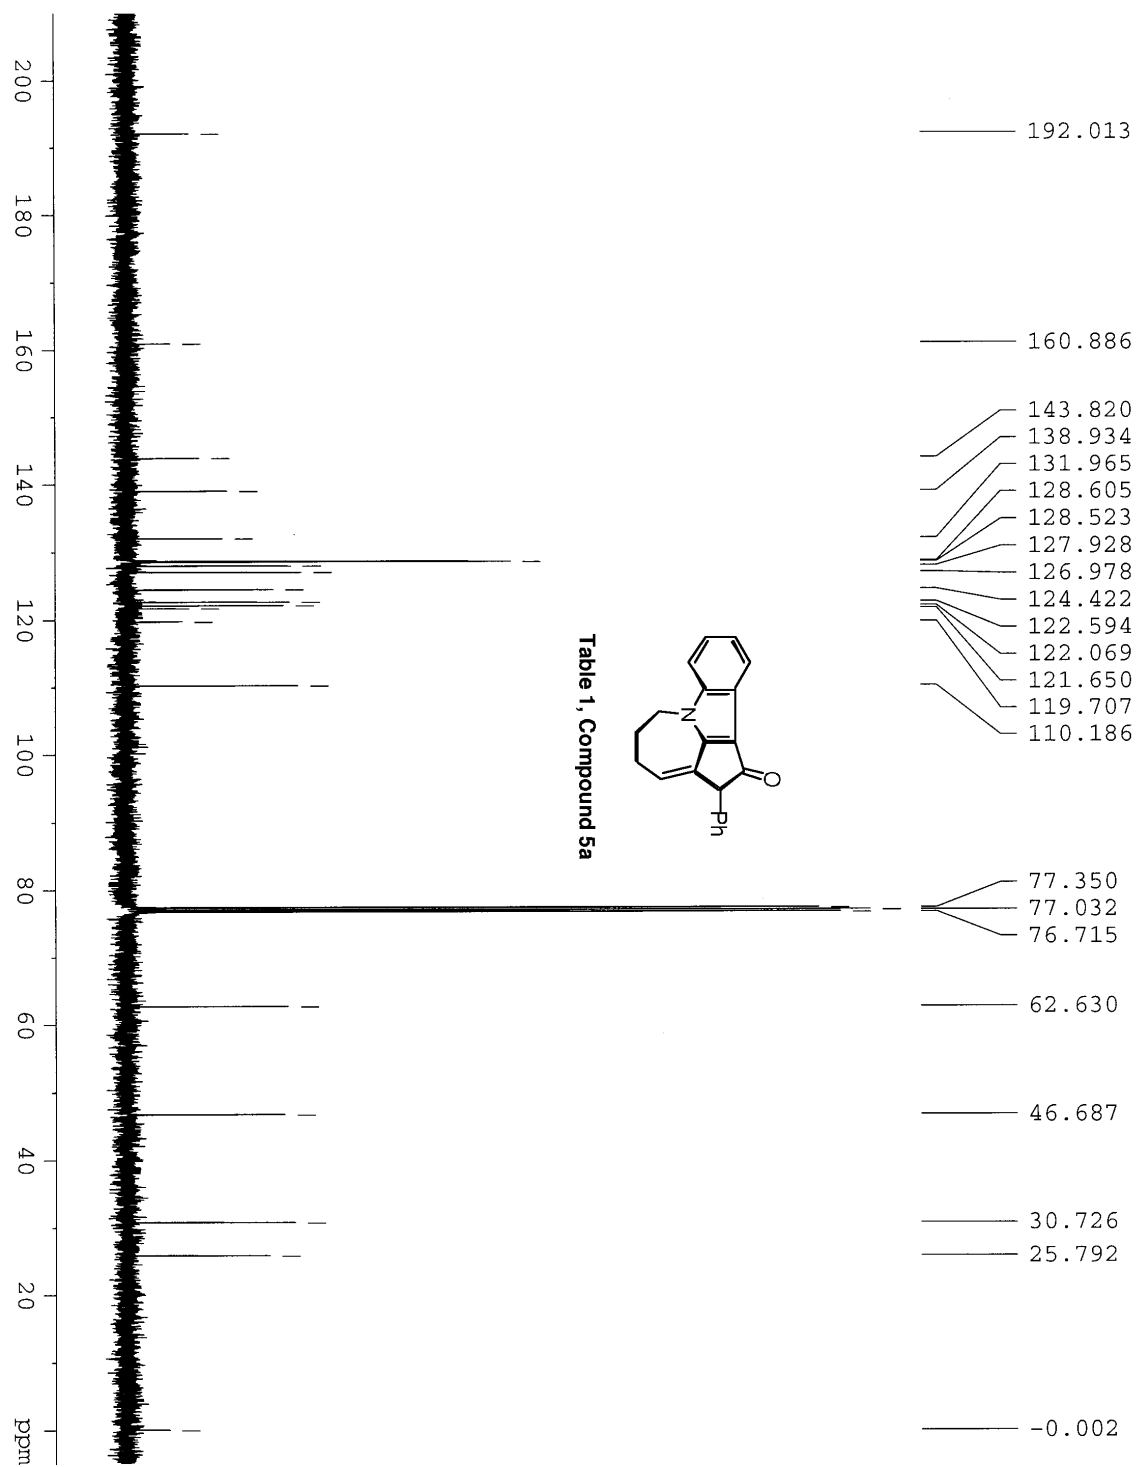

Supplement: Supplementary file 1 [file 5836440]
